# Supplementary material for: Transition-metal-free persulfuration to construct unsymmetrical disulfides and mechanistic study of the sulfur redox process
Source: Royal Society of Chemistry journal article supplement (doi:10.1039/c4cc09633a), 2015-01-01

Supporting Information

**Transition-metal-free Persulfuration to Construct Unsymmetrical  
Disulfides and Mechanistic Study of Sulfur Redox Process**

Xiao Xiao,<sup>†</sup> Minghao Feng,<sup>†</sup> and Xuefeng Jiang\*,<sup>†</sup>

<sup>†</sup> Shanghai Key Laboratory of Green Chemistry and Chemical Process, Department of Chemistry,  
East China Normal University, 3663 North Zhongshan Road, Shanghai  
200062, P. R. China

[xfjiang@chem.ecnu.edu.cn](mailto:xfjiang@chem.ecnu.edu.cn)

**Index**

|                                                                        |           |
|------------------------------------------------------------------------|-----------|
| <b>I. General Information .....</b>                                    | <b>2</b>  |
| <b>II. Starting Materials Synthetic Procedure .....</b>                | <b>3</b>  |
| <b>III. General procedure .....</b>                                    | <b>4</b>  |
| <b>IV. Disulfides Synthesis and Spectra Data .....</b>                 | <b>4</b>  |
| <b>V. X-ray Crystallography Analysis of Compound 2i, 4 and 5 .....</b> | <b>21</b> |
| <b>VI. Gram Scale Reaction.....</b>                                    | <b>24</b> |
| <b>VII. Control Experiments.....</b>                                   | <b>25</b> |
| <b>VIII. References .....</b>                                          | <b>28</b> |
| <b>IX. NMR Spectra .....</b>                                           | <b>29</b> |

## **I. General Information**

### **NMR spectrum:**

$^1\text{H}$  and  $^{13}\text{C}$  NMR spectra were collected on 400 MHz NMR spectrometers (Bruker AVANCE) using  $\text{CDCl}_3$ . Chemical shifts are reported in parts per million (ppm). Chemical shifts for protons are reported in parts per million downfield and are referenced to residual protium in the NMR solvent ( $\text{CHCl}_3 = \delta 7.26$ ). Chemical shifts for carbon are reported in parts per million downfield and are referenced to the carbon resonances of the solvent ( $\text{CDCl}_3 = \delta 77.0$ ). Data are represented as follows: chemical shift, multiplicity (br = broad, s = singlet, d = doublet, t = triplet, q = quartet, m = multiplet), coupling constants in Hertz (Hz), integration.

### **Mass spectroscopy:**

Mass spectra were in general recorded on a Shimadzu GCMS-QP2010 Ultra and a HP 5989A mass selective detector.

### **Chromatography:**

Column chromatography was performed with silica gel (200-300 mesh ASTM).

### **IR:**

TENSOR (27) Series FT-IR Spectrometers.

## II. Starting Materials Synthetic Procedure

Most of the thiosulfate and sulfinate sodium are prepared according to the reported literatures.<sup>[1, 2]</sup>

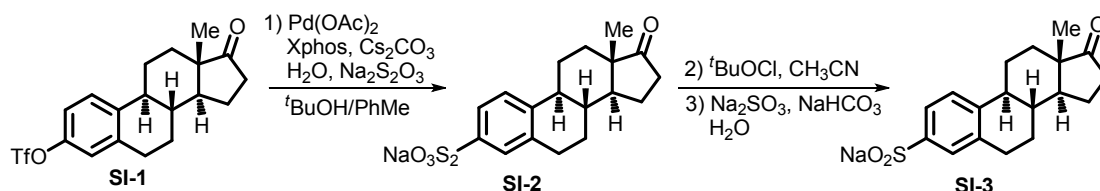

**SI-1** (483.0 mg, 1.2 mmol, 1.0 equiv.),  $\text{Pd}(\text{OAc})_2$  (26.9 mg, 0.12 mmol, 10 mol%), Xphos (171.6 mg, 0.36 mmol, 30 mol%),  $\text{Cs}_2\text{CO}_3$  (782.0 mg, 2.4 mmol, 2.0 equiv.),  $\text{H}_2\text{O}$  (43.2 mg, 2.4 mmol, 2.0 equiv.),  $\text{Na}_2\text{S}_2\text{O}_3$  (474.3 mg, 3.0 mmol, 2.5 equiv.) was added to solvent of  $t\text{BuOH}/\text{PhMe}$  (1.2/1.8 mL) at  $\text{N}_2$  atmosphere. Then the mixture was heated to 80 °C for 8 h<sup>[1c]</sup> before  $\text{Et}_2\text{O}$  was added to this mixture, which was then filtered at atmosphere pressure,  $\text{MeOH}$  (20 mL) was added to the filter cake, which was then filtered at atmosphere pressure. The filtrate was collected and removed the solvent under vacuum to give the crude **SI-2**.

The crude product **SI-2** was dissolved in  $\text{CH}_3\text{CN}$  (10 mL) and treated with  $\text{H}_2\text{O}$  (108.0 mg, 6.0 mmol, 5.0 equiv.),  $t\text{BuOCl}$  (651.4 mg, 6.0 mmol, 5.0 equiv.) at 0 °C for 30 min. Then removed the solvent under vacuum and purified by silica gel to give the corresponding sulfonyl chloride.

The corresponding sulfonyl chloride (113.0 mg, 0.32 mmol),  $\text{Na}_2\text{SO}_3$  (80.7 mg, 0.64 mmol, 2.0 equiv.) and  $\text{NaHCO}_3$  (53.8 mg, 0.64 mmol, 2.0 equiv.) was added to the solvent of water (1.0 mL), then the mixture was heated to 80 °C for 8 h. Removed the solvent under vacuum, then added  $\text{MeOH}$  to dissolved the residue. Then the mixture was filtered at atmosphere pressure. The filtrate was collected and concentrated to give **SI-3** (82 mg, 0.24 mmol, 20% over three steps) as a colorless solid.

### III. General procedure:

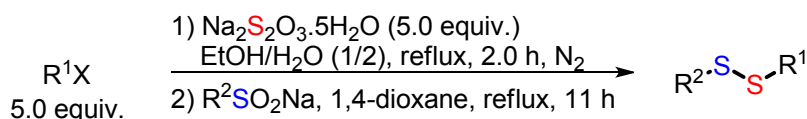

Step 1: To a Schlenk tube were added  $\text{Na}_2\text{S}_2\text{O}_3 \cdot 5\text{H}_2\text{O}$  (248.2 mg, 1.0 mmol, 5.0 equiv.), alkyl halide (1.0 mmol, 5.0 equiv.), EtOH/ $\text{H}_2\text{O}$  (0.25 mL/0.5 mL), the mixture was stirred at reflux for 2 hours under  $\text{N}_2$  atmosphere, then removed the solvent to proceed step 2.

Step 2:  $\text{R}^2\text{SO}_2\text{Na}$  (0.2 mmol, 1.0 equiv.), 1,4-dioxane (1.0 mL) were added to the reaction, then the mixture was stirred at 110 °C (reflux) for 11 hours. When the reaction was finished, the mixture was cooled to room temperature. The desired product was obtained after work up and purification.

### VI. Disulfides Synthesis and Spectra Data

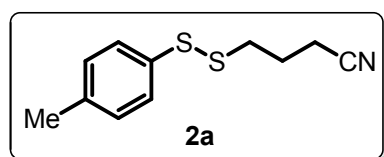

Compound **2a**: The reaction was conducted according to the general procedure. After the reaction was finished,  $\text{PPh}_3$  (31.5 mg, 0.12 mmol, 0.6 equiv.) was added. The reaction system was stirred at 50 °C for 4 hours before it was concentrated under vacuum. Purification by column chromatography afforded the title product (41.9 mg, 0.188 mmol, 94%) as a yellow oil.  $^1\text{H NMR}$  (400 MHz,  $\text{CDCl}_3$ )  $\delta$  7.43 (d,  $J$  = 8.0 Hz, 2H), 7.15 (d,  $J$  = 8.0 Hz, 2H), 2.81 (t,  $J$  = 6.8 Hz, 2H), 2.44 (t,  $J$  = 7.2 Hz, 2H), 2.34 (s, 3H), 2.09-2.03 (m, 2H);  $^{13}\text{C NMR}$  (100 MHz,  $\text{CDCl}_3$ )  $\delta$  137.74, 133.11, 129.90, 129.06, 118.94, 36.41, 24.08, 21.04, 15.59; **IR** (film) 3028, 2924, 2247, 1900, 1488, 1424, 1260, 1206, 1110, 1017, 805, 761  $\text{cm}^{-1}$ ; **HRMS (EI)** Calcd for  $\text{C}_{11}\text{H}_{13}\text{NS}_2$  223.0489, Found 223.0491.

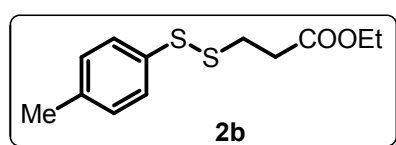

Compound **2b**: The reaction was conducted according to the general procedure.

Concentration under vacuum and purification by column chromatography gave the title compound (44.6 mg, 0.174 mmol, 87%) as a yellow oil. **<sup>1</sup>H NMR** (400 MHz, CDCl<sub>3</sub>) δ 7.43 (d, *J* = 8.0 Hz, 2H ), 7.14 (d, *J* = 8.0 Hz, 2H ), 4.13 (q, *J* = 7.2 Hz, 2H ), 2.95 (t, *J* = 7.2 Hz, 2H ), 2.72 (t, *J* = 7.2 Hz, 2H), 2.34 (s, 3H), 1.25 (t, *J* = 7.2 Hz, 3H); **<sup>13</sup>C NMR** (100 MHz, CDCl<sub>3</sub>) δ 171.61, 137.26, 133.43, 129.77, 128.49, 60.70, 33.73, 33.04, 20.99, 14.12; **IR** (film) 2978, 1733, 1487, 1372, 1235, 1181, 1023, 932, 849, 804 cm<sup>-1</sup>; **HRMS (EI)** Calcd for C<sub>12</sub>H<sub>16</sub>O<sub>2</sub>S<sub>2</sub> 256.0592, Found 256.0594.

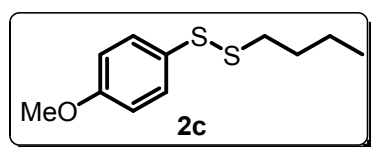

Compound **2c**: To a Schlenk tube were added <sup>n</sup>BuS<sub>2</sub>O<sub>3</sub>Na (1.0 mmol, 5.0 equiv.), 4-MeOPhSO<sub>2</sub>Na (0.2 mmol, 1.0 equiv.) and 1,4-dioxane (1.0 mL), the mixture was stirred at 110 °C (reflux) for 11 hours. When the reaction was finished, the mixture was cooled to room temperature, worked up with tri-*o*-tolylphosphine (0.12 mmol, 0.6 equiv.) at 100 °C for 4 hours. The mixture was then concentrated and purified by column chromatography to afford desired product (24.2 mg, 0.106 mmol, 53%) as a yellow oil. **<sup>1</sup>H NMR** (400 MHz, CDCl<sub>3</sub>) δ 7.49-7.47 (m, 2H), 6.88-6.85 (m, 2H), 3.81 (s, 3H), 2.73 (t, *J* = 7.2 Hz, 2H), 1.69-1.62 (m, 2H), 1.43-1.33 (m, 2H), 0.89 (t, *J* = 7.2 Hz, 3H); **<sup>13</sup>C NMR** (100 MHz, CDCl<sub>3</sub>) δ 159.40, 131.59, 128.44, 114.55, 55.36, 38.43, 30.72, 21.58, 13.64; **IR** (film) 2955, 1588, 1490, 1458, 1287, 1244, 1175, 1097, 1031, 823, 738 cm<sup>-1</sup>; **HRMS (EI)** Calcd for C<sub>11</sub>H<sub>16</sub>OS<sub>2</sub> 228.0643, Found 228.0645.

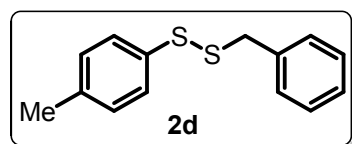

Compound **2d**<sup>[3]</sup>: The reaction was conducted according to the general procedure. Concentration under vacuum and purification by column chromatography gave the title compound (38.4 mg, 0.156 mmol, 78%) as a colorless solid. **<sup>1</sup>H NMR** (400 MHz, CDCl<sub>3</sub>) δ 7.42 (dd, *J* = 8.0, 2.0 Hz, 2H), 7.35 (m, 5H) 7.17 (d, *J* = 8.0 Hz, 2H) 4.00 (d, *J* = 2.0 Hz, 2H), 2.40 (s, 3H); **<sup>13</sup>C NMR** (100 MHz, CDCl<sub>3</sub>) δ 137.11, 136.62, 133.51, 129.68, 129.36, 128.59, 128.48, 127.44, 43.19, 21.02; **IR** (film) 3027, 2921, 1892,

1597, 1488, 1451, 1262, 1203, 1073, 1022, 914, 803, 763, 698  $\text{cm}^{-1}$ ; **MS (EI)**  $m/z$  246 (M<sup>+</sup>).

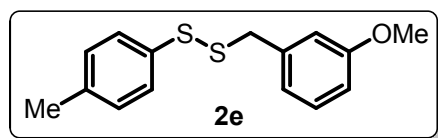

Compound **2e**: The reaction was conducted according to the general procedure. Concentration under vacuum and purification by column chromatography gave the title compound (50.3 mg, 0.182 mmol, 91%) as a colorless oil. **<sup>1</sup>H NMR** (400 MHz,  $\text{CDCl}_3$ )  $\delta$  7.40 (d,  $J$  = 8.0 Hz, 2H), 7.24 (t,  $J$  = 8.0 Hz, 1H), 7.14 (d,  $J$  = 8.0 Hz, 2H), 6.90 (d,  $J$  = 8.4 Hz, 1H), 6.84-6.82 (m, 2H), 3.95 (s, 2H), 3.80 (s, 3H), 2.37 (s, 3H); **<sup>13</sup>C NMR** (100 MHz,  $\text{CDCl}_3$ )  $\delta$  159.60, 138.11, 137.13, 133.53, 129.67, 129.46, 128.66, 121.70, 114.69, 113.13, 55.14, 43.36, 21.02; **IR** (film) 2919, 2834, 1894, 1599, 1489, 1453, 1435, 1296, 1263, 1222, 1151, 1115, 1078, 1043, 1016, 996, 934, 871, 804, 782, 735, 700  $\text{cm}^{-1}$ ; **HRMS (EI)** Calcd for  $\text{C}_{15}\text{H}_{16}\text{OS}_2$  276.0643, Found 276.0645.

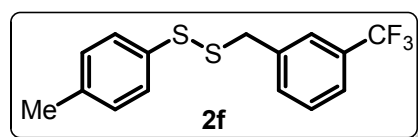

Compound **2f**: The reaction was conducted according to the general procedure. After the reaction was finished, tri-*o*-tolylphosphine (36.5 mg, 0.12 mmol, 0.6 equiv.) was added. The reaction system was stirred at 100 °C for 4 hours before it was cooled to room temperature. Then DDQ (27.2 mg, 0.12 mmol, 0.6 equiv.) was added (to obtain the purified unsymmetrical disulfide, DDQ was added to oxidize a small amount of 3-CF<sub>3</sub>BnSH), and the system was stirred at room temperature for 4 hours before it was concentrated under vacuum. Purification by column chromatography afforded the title product (49.0 mg, 0.156 mmol, 78%) as a red oil. **<sup>1</sup>H NMR** (400 MHz,  $\text{CDCl}_3$ )  $\delta$  7.50-7.36 (m, 4H), 7.30 (d,  $J$  = 8.0 Hz, 2H), 7.08 (d,  $J$  = 8.0 Hz, 2H), 3.96 (s, 2H), 2.33 (s, 3H); **<sup>19</sup>F NMR** (377 MHz,  $\text{CDCl}_3$ )  $\delta$  62.65; **<sup>13</sup>C NMR** (100 MHz,  $\text{CDCl}_3$ )  $\delta$  137.77, 137.41, 133.01, 132.70, 130.71 (q,  $^2J_{\text{C-F}}$  = 32.1 Hz), 129.70, 128.84, 128.83, 126.13 (q,  $^3J_{\text{C-F}}$  = 3.8 Hz), 124.16 (q,  $^3J_{\text{C-F}}$  = 3.8 Hz), 123.94 (q,  $^1J_{\text{C-F}}$  = 270.6 Hz),

42.57, 20.98; **IR** (film) 3028, 1489, 1448, 1327, 1166, 1124, 1075, 899, 801, 744, 699  $\text{cm}^{-1}$ ; **HRMS (EI)** Calcd for  $\text{C}_{15}\text{H}_{13}\text{F}_3\text{S}_2$  314.0411, Found 314.0409.

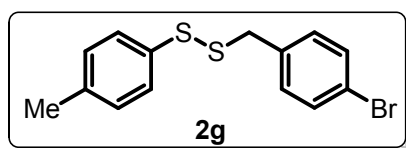

Compound **2g**: The reaction was conducted according to the general procedure. After the reaction was finished, DDQ (27.2 mg, 0.12 mmol, 0.6 equiv.) was added. The reaction system was stirred at room temperature for 4 hours before it was concentrated under vacuum. Purification by column chromatography afforded the title product (48.8 mg, 0.150 mmol, 75%) as a white solid.  **$^1\text{H}$  NMR** (400 MHz,  $\text{CDCl}_3$ )  $\delta$  7.39 (d,  $J = 8.4$  Hz, 2H), 7.32 (d,  $J = 8.0$  Hz, 2H), 7.12 (m, 4H), 3.87 (s, 2H), 2.35 (s, 3H);  **$^{13}\text{C}$  NMR** (100 MHz,  $\text{CDCl}_3$ )  $\delta$  137.29, 135.74, 133.20, 131.49, 131.01, 129.68, 128.73, 121.43, 42.40, 21.03; **IR** (film) 3027, 2920, 1896, 1589, 1485, 1404, 1193, 1071, 1012, 873, 805, 731  $\text{cm}^{-1}$ ; **HRMS (EI)** Calcd for  $\text{C}_{14}\text{H}_{13}\text{BrS}_2$  323.9642, Found 323.9639.

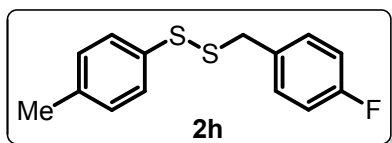

Compound **2h**: The reaction was conducted according to the general procedure. After the reaction was finished, tri-*o*-tolylphosphine (36.5 mg, 0.12 mmol, 0.6 equiv.) was added. The reaction system was stirred at 100  $^{\circ}\text{C}$  for 4 hours before it was cooled to room temperature. Then DDQ (27.2 mg, 0.12 mmol, 0.6 equiv.) was added, and the system was stirred at room temperature for 4 hours before it was concentrated under vacuum. Purification by column chromatography afforded the title product (37.5 mg, 0.142 mmol, 71%) as a red oil.  **$^1\text{H}$  NMR** (400 MHz,  $\text{CDCl}_3$ )  $\delta$  7.38 (d,  $J = 8.4$  Hz, 2H), 7.30-7.25 (m, 2H), 7.14 (d,  $J = 8.0$  Hz, 2H), 7.03-6.97 (m, 2H), 3.94 (s, 2H), 2.38 (s, 3H);  **$^{19}\text{F}$  NMR** (377 MHz,  $\text{CDCl}_3$ )  $\delta$  114.83;  **$^{13}\text{C}$  NMR** (100 MHz,  $\text{CDCl}_3$ )  $\delta$  162.16 (d,  $^1J_{\text{C-F}} = 244.7$  Hz), 137.24, 133.35, 132.47 (d,  $^4J_{\text{C-F}} = 3.2$  Hz), 130.97 (d,  $^3J_{\text{C-F}} = 8.1$  Hz), 129.70, 128.63, 115.34 (d,  $^2J_{\text{C-F}} = 21.4$  Hz), 42.30, 21.02; **IR** (film) 2919, 1897, 1599, 1502, 1423, 1300, 1226, 1155, 1086, 1016, 835, 806, 747, 680  $\text{cm}^{-1}$ ;

**HRMS (EI)** Calcd for  $C_{14}H_{13}FS_2$  264.0443, Found 264.0446.

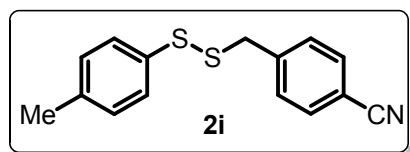

Compound **2i**: Step 1 was according to the general procedure. Removed the solvent after step 1 was finished, TolSO<sub>2</sub>Na (0.2 mmol), 1,4-dioxane (1.0 mL) were added, the mixture was stirred at 90 °C for 11 hours. After the reaction was finished, the mixture was concentrated, purified by column chromatography to afford desired product (29.3 mg, 0.108 mmol, 54%) as a white solid. **<sup>1</sup>H NMR** (400 MHz, CDCl<sub>3</sub>) δ 7.54 (d, *J* = 8.0 Hz, 2H), 7.36 (d, *J* = 8.0 Hz, 2H), 7.29 (d, *J* = 8.0 Hz, 2H), 7.09 (d, *J* = 8.0 Hz, 2H), 3.93 (s, 2H), 2.35 (s, 3H); **<sup>13</sup>C NMR** (100 MHz, CDCl<sub>3</sub>) δ 142.36, 137.58, 132.79, 132.11, 130.07, 129.72, 128.82, 118.66, 111.10, 42.53, 21.01; **IR** (film) 2922, 2228, 1902, 1604, 1490, 1413, 1178, 1103, 1021, 841, 804, 741 cm<sup>-1</sup>; **HRMS (EI)** Calcd for  $C_{15}H_{13}NS_2$  271.0489, Found 271.0490.

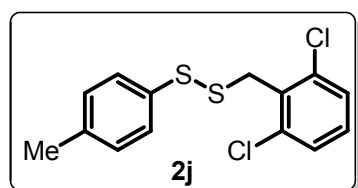

Compound **2j**: The reaction was conducted according to the general procedure. After the reaction was finished, DDQ (27.2 mg, 0.12 mmol, 0.6 equiv.) was added. The reaction system was stirred at room temperature for 4 hours before it was concentrated under vacuum. Purification by column chromatography afforded the title product (46.7 mg, 0.148 mmol, 74%) as a white solid. **<sup>1</sup>H NMR** (400 MHz, CDCl<sub>3</sub>) δ 7.44 (d, *J* = 8.0 Hz, 2H), 7.29 (d, *J* = 8.0 Hz, 2H), 7.15-7.11 (m, 3H), 4.34 (s, 2H), 2.37 (s, 3H); **<sup>13</sup>C NMR** (100 MHz, CDCl<sub>3</sub>) δ 136.88, 135.95, 133.67, 133.03, 129.54, 128.95, 128.24, 127.97 38.58, 21.01; **IR** (film) 2921, 1894, 1567, 1488, 1434, 1299, 1209, 1089, 1018, 872, 804, 769, 733, 674 cm<sup>-1</sup>; **HRMS (EI)** Calcd for  $C_{14}H_{12}Cl_2S_2$  313.9757, Found 313.9754.



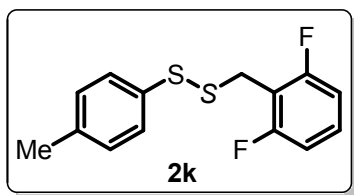

Compound **2k**: The reaction was conducted according to general procedure. Concentration under vacuum and purification by column chromatography gave the title compound (48.5 mg, 0.172 mmol, 86%) as a colorless oil. **<sup>1</sup>H NMR** (400 MHz, CDCl<sub>3</sub>) δ 7.40 (d, *J* = 8.0 Hz, 2H), 7.23-7.15 (m, 1H), 7.11 (d, *J* = 8.0 Hz, 2H), 6.88-6.82 (m, 2H), 4.01 (s, 2H), 2.34 (s, 3H); **<sup>19</sup>F NMR** (377 MHz, CDCl<sub>3</sub>) δ 114.13; **<sup>13</sup>C NMR** (100 MHz, CDCl<sub>3</sub>) δ 161.40 (dd, <sup>1</sup>*J*<sub>C-F</sub> = 248.2 Hz, <sup>3</sup>*J*<sub>C-F</sub> = 7.7 Hz), 137.20, 133.39, 129.62, 129.07 (t, <sup>3</sup>*J*<sub>C-F</sub> = 10.2 Hz), 128.57, 113.45 (t, <sup>2</sup>*J*<sub>C-F</sub> = 19.1 Hz), 111.13 (dd, <sup>2</sup>*J*<sub>C-F</sub> = 19.0 Hz, <sup>4</sup>*J*<sub>C-F</sub> = 6.1 Hz), 29.61, 21.02; **IR** (film) 2924, 1905, 1624, 1590, 1470, 1272, 1235, 1173, 1135, 994, 788, 734, 695 cm<sup>-1</sup>; **HRMS (EI)** Calcd for C<sub>14</sub>H<sub>12</sub>F<sub>2</sub>S<sub>2</sub> 282.0348, Found 282.0347.

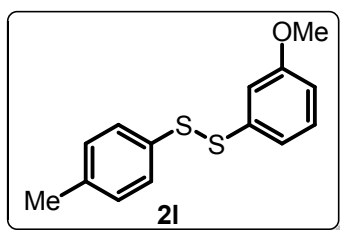

Compound **2l**: To a Schlenk tube were added 3-MeOPhS<sub>2</sub>O<sub>3</sub>Na (1.0 mmol, 5.0 equiv.), TolSO<sub>2</sub>Na (0.2 mmol, 1.0 equiv.) and 1,4-dioxane (1.0 mL), the mixture was stirred at 110 °C (reflux) for 11 hours. When the reaction was finished, the mixture was concentrated and purified by column chromatography to afford the desired product (26.7 mg, 0.102 mmol, 51%) as a white solid. **<sup>1</sup>H NMR** (400 MHz, CDCl<sub>3</sub>) δ 7.42 (d, *J* = 8.0 Hz, 2H), 7.24-7.20 (m, 1H), 7.13-7.08 (m, 4H), 6.78-6.75 (m, 1H), 3.78 (s, 3H), 2.34 (s, 3H); **<sup>13</sup>C NMR** (100 MHz, CDCl<sub>3</sub>) δ 159.96, 138.54, 137.54, 133.54, 129.81, 128.40, 119.51, 112.98, 112.40, 55.26, 21.03; **IR** (film) 2937, 1584, 1477, 1426, 1282, 1239, 1178, 1039, 851, 803, 772, 685 cm<sup>-1</sup>; **HRMS (EI)** Calcd for C<sub>14</sub>H<sub>14</sub>OS<sub>2</sub> 262.0486, Found 262.0488.

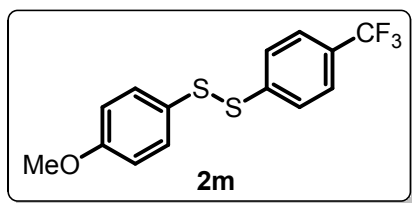

Compound **2m**: To a Schlenk tube were added, 4-CF<sub>3</sub>PhS<sub>2</sub>O<sub>3</sub>Na (1.0 mmol, 5.0 equiv.), 4-MeOPhSO<sub>2</sub>Na (0.2 mmol, 1.0 equiv.), and 1,4-dioxane (1.0 mL), the mixture was stirred at 110 °C (reflux) for 11 hours. When the reaction was finished, the mixture was concentrated and purified by column chromatography to afford the desired product (37.9 mg, 0.12 mmol, 60%) as a yellow oil. **<sup>1</sup>H NMR** (400 MHz, CDCl<sub>3</sub>) δ 7.63 (d, *J* = 8.0 Hz, 2H), 7.56 (d, *J* = 8.4 Hz, 2H), 7.43 (d, *J* = 8.8 Hz, 2H), 6.84 (d, *J* = 8.8 Hz, 2H), 3.79 (s, 3H); **<sup>19</sup>F NMR** (377 MHz, CDCl<sub>3</sub>) δ 62.40; **<sup>13</sup>C NMR** (100 MHz, CDCl<sub>3</sub>) δ 160.04, 142.31, 131.81, 128.80 (q, <sup>2</sup>*J*<sub>C-F</sub> = 32.5 Hz), 126.95, 126.86, 126.68 (q, <sup>1</sup>*J*<sub>C-F</sub> = 270.2 Hz), 125.82 (q, <sup>3</sup>*J*<sub>C-F</sub> = 3.7 Hz), 114.84, 55.36; **IR** (film) 2949, 2838, 1595, 1490, 1400, 1321, 1247, 1167, 1120, 1022, 824, 705 cm<sup>-1</sup>; **HRMS (EI)** Calcd for C<sub>14</sub>H<sub>11</sub>F<sub>3</sub>OS<sub>2</sub> 316.0203, Found 316.0201.

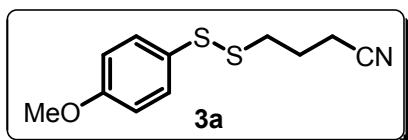

Compound **3a**: The reaction was conducted according to the general procedure. After the reaction was finished, tri-*m*-tolylphosphine (36.5 mg, 0.12 mmol, 0.6 equiv.) was added. The reaction system was stirred at room temperature for 4 hours before it was concentrated under vacuum. Purification by column chromatography afforded the title product (30.6 mg, 0.128 mmol, 64%) as a colorless oil. **<sup>1</sup>H NMR** (400 MHz, CDCl<sub>3</sub>) δ 7.50-7.46 (m, 2H), δ 6.89-6.85 (m, 2H), 3.81 (s, 3H), 2.81 (t, *J* = 6.4 Hz, 2H), 2.43 (t, *J* = 7.2 Hz, 2H), 2.11-2.04 (m, 2H); **<sup>13</sup>C NMR** (100 MHz, CDCl<sub>3</sub>) δ 159.85, 132.41, 127.35, 118.99, 114.75, 55.36, 36.32, 24.07, 15.57; **IR** (film) 2941, 2837, 2247, 2043, 1588, 1490, 1452, 1288, 1245, 1175, 1101, 1027, 825 cm<sup>-1</sup>; **HRMS (EI)** Calcd for C<sub>11</sub>H<sub>13</sub>NOS<sub>2</sub> 239.0439, Found 239.0438.

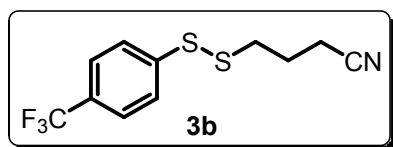

Compound **3b**: The reaction was conducted according to the general procedure. After the reaction was finished, tri-*m*-tolylphosphine (36.5 mg, 0.12 mmol, 0.6 equiv.) was added. The reaction system was stirred at room temperature for 4 hours before it was concentrated under vacuum. Purification by column chromatography afforded the title product (34.4 mg, 0.124mmol, 62%) as a yellow oil. **<sup>1</sup>H NMR** (400 MHz, CDCl<sub>3</sub>) δ 7.63 (d, *J* = 8.4 Hz, 2H ), 7.58 (d, *J* = 8.8 Hz, 2H ), 2.84 (t, *J* = 6.8 Hz, 2H ), 2.48 (t, *J* = 6.8 Hz, 2H ), 2.09-2.0 (m, 2H); **<sup>19</sup>F NMR** (377 MHz, CDCl<sub>3</sub>) δ 62.47; **<sup>13</sup>C NMR** (100 MHz, CDCl<sub>3</sub>) δ 141.5, 128.95 (q, <sup>2</sup>*J*<sub>C-F</sub> = 32.5 Hz), 126.70, 125.94 (q, <sup>3</sup>*J*<sub>C-F</sub> = 3.8 Hz) 123.88 (q, <sup>1</sup>*J*<sub>C-F</sub> = 270.2 Hz), 118.64, 36.42, 24.27, 15.73; **IR** (film) 2929, 2248, 1603, 1496, 1401, 1323, 1261, 1163, 1120, 1080, 1061, 1012, 829, 777, 724, 699 cm<sup>-1</sup>; **HRMS (EI)** Calcd for C<sub>11</sub>H<sub>10</sub>F<sub>3</sub>NS<sub>2</sub> 277.0207, Found 277.0205.

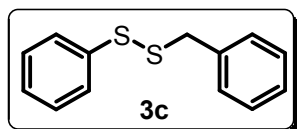

Compound **3c**<sup>[3]</sup>: The reaction was conducted according to the general procedure. After the reaction was finished, DDQ (27.2 mg, 0.12 mmol, 0.6 equiv.) was added. The reaction system was stirred at room temperature for 4 hours before it was concentrated under vacuum. Purification by column chromatography afforded the title product (40.0 mg, 0.172mmol, 86%) as a red oil. **<sup>1</sup>H NMR** (400 MHz, CDCl<sub>3</sub>) δ 7.51 (d, *J* = 7.6 Hz, 2H), 7.36-7.24 (m, 8H), 4.0 (s, 2H), **<sup>13</sup>C NMR** (100 MHz, CDCl<sub>3</sub>) δ 136.94, 136.50, 129.36, 128.89, 128.50, 127.58, 127.52, 126.6, 43.28; **IR** (film) 3062, 2922, 1580, 1478, 1443, 1301, 1230, 1069, 1024, 910, 740, 693 cm<sup>-1</sup>; **MS (EI)** *m/z* 232 (M<sup>+</sup>).

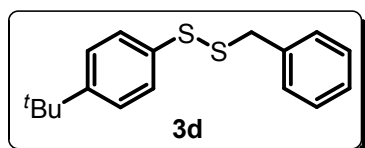

Compound **3d**: The reaction was conducted according to the general procedure. After

the reaction was finished, DDQ (27.2 mg, 0.12 mmol, 0.6 equiv.) was added. The reaction system was stirred at room temperature for 4 hours before it was concentrated under vacuum. Purification by column chromatography afforded the title product (38.0 mg, 0.132mmol, 66%) as a red oil. **<sup>1</sup>H NMR** (400 MHz, CDCl<sub>3</sub>) δ 7.47-7.45 (m, 2H), 7.9-7.30 (m, 7H), 4.01 (s, 2H), 1.38 (s, 9H); **<sup>13</sup>C NMR** (100 MHz, CDCl<sub>3</sub>) δ 150.27, 136.65, 133.56, 129.37, 128.48, 128.15, 127.45, 126.00, 43.35, 34.50, 31.25; **IR** (film) 3029, 2959, 1596, 1489, 1397, 1268, 1196, 1115, 1071, 1016, 916, 824, 763, 698 cm<sup>-1</sup>; **HRMS (EI)** Calcd for C<sub>17</sub>H<sub>20</sub>S<sub>2</sub> 288.1006, Found 288.1004.

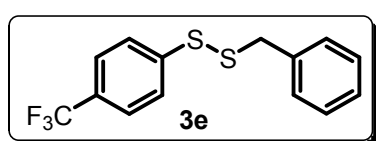

Compound **3e**: The reaction was conducted according to the general procedure. After the reaction was finished, DDQ (27.2 mg, 0.12 mmol, 0.6 equiv.) was added. The reaction system was stirred at room temperature for 4 hours before it was concentrated under vacuum. Purification by column chromatography afforded the title product (36.6 mg, 0.122mmol, 61%) as a white solid. **<sup>1</sup>H NMR** (400 MHz, CDCl<sub>3</sub>) δ 7.53 (s, 4H), 7.31-7.29 (m, 5H), 4.00 (s, 2H); **<sup>19</sup>F NMR** (377 MHz, CDCl<sub>3</sub>) δ 62.42; **<sup>13</sup>C NMR** (100 MHz, CDCl<sub>3</sub>) δ 141.98, 136.13, 129.34, 128.57, 128.40 (q, <sup>2</sup>J<sub>C-F</sub> = 32.5 Hz), 127.73, 126.41, 125.55 (q, <sup>3</sup>J<sub>C-F</sub> = 3.7 Hz), 124.01 (q, <sup>1</sup>J<sub>C-F</sub> = 270.1 Hz), 43.42; **IR** (film) 3031, 1603, 1494, 1453, 1401, 1323, 1165, 1121, 1071, 1013, 829, 764, 698 cm<sup>-1</sup>; **HRMS (EI)** Calcd for C<sub>14</sub>H<sub>11</sub>F<sub>3</sub>S<sub>2</sub> 300.0254, Found 300.0252.

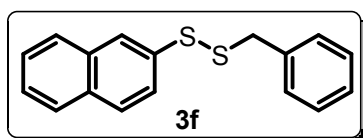

Compound **3f**<sup>[4]</sup>: The reaction was conducted according to the general procedure. Concentration under vacuum and purification by column chromatography gave the title compound (44.0 mg, 0.156 mmol, 78%) as a white solid. **<sup>1</sup>H NMR** (400 MHz, CDCl<sub>3</sub>) δ 7.92 (s, 1H), 7.87-7.79 (m, 3H), 7.60-7.49 (m, 3H), 7.36-7.28 (m, 5H), 4.03 (s, 2H); **<sup>13</sup>C NMR** (100 MHz, CDCl<sub>3</sub>) δ 136.59, 134.18, 133.41, 132.24, 129.39, 128.68, 128.52, 127.71, 127.55, 127.31, 126.61, 126.24, 126.00, 125.72, 43.28; **IR**

(film) 3052, 1947, 1586, 1496, 1452, 1344, 1231, 1195, 1134, 1067, 1020, 946, 888, 851, 810, 745, 697  $\text{cm}^{-1}$ ; **MS (EI)**  $m/z$  282 ( $M^+$ ).

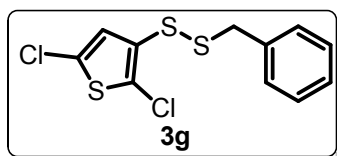

Compound **3g**: Step 1 was according to the general procedure. Removed the solvent after step 1 was finished, sodium 2,5-dichlorothiophene-3-sulfinate (0.2 mmol, 1.0 equiv.), 1,4-dioxane (1.0 mL) were added, the mixture was stirred at 90 °C for 11 hours. After the reaction was finished, DDQ (27.2 mg, 0.12 mmol, 0.6 equiv.) was added. The reaction system was stirred at room temperature for 4 hours before it was concentrated under vacuum. Purification by column chromatography afforded the title product (44.2 mg, 0.144 mmol, 72%) as a colorless oil.  **$^1\text{H}$  NMR** (400 MHz,  $\text{CDCl}_3$ )  $\delta$  7.30-7.26 (m, 5H), 6.56 (s, 1H), 3.99 (s, 2H);  **$^{13}\text{C}$  NMR** (100 MHz,  $\text{CDCl}_3$ )  $\delta$  136.3, 131.50, 129.35, 128.58, 128.31, 127.74, 126.33, 125.94, 43.99; **IR** (film) 3092, 3028, 2920, 1947, 1878, 1598, 1504, 1452, 1415, 1303, 1231, 1195, 1138, 1032, 913, 823, 761, 697  $\text{cm}^{-1}$ ; **HRMS (EI)** Calcd for  $\text{C}_{11}\text{H}_8\text{Cl}_2\text{S}_3$  305.9165, Found 305.9168.

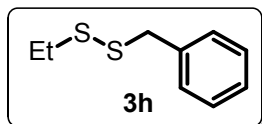

Compound **3h**<sup>[5]</sup>: The reaction was conducted according to the general procedure. After the reaction was finished, DDQ (27.2 mg, 0.12 mmol, 0.6 equiv.) was added. The reaction system was stirred at room temperature for 4 hours before it was concentrated under vacuum. Purification by column chromatography afforded the title product (22.8 mg, 0.124mmol, 62%) as a red oil.  **$^1\text{H}$  NMR** (400 MHz,  $\text{CDCl}_3$ )  $\delta$  7.39-7.30 (m, 5H), 3.94 (s, 2H), 2.47 (q,  $J$  = 7.2 Hz, 2H) 1.26 (t,  $J$  = 7.2 Hz, 3H );  **$^{13}\text{C}$  NMR** (100 MHz,  $\text{CDCl}_3$ )  $\delta$  137.54, 129.25, 128.45, 127.34, 43.73, 32.39, 14.26; **IR** (film) 3028, 2967, 2922, 1600, 1494, 1450, 1252, 1195, 1067, 1031, 968, 913, 763, 698, 668  $\text{cm}^{-1}$ ; **MS (EI)**  $m/z$  184 ( $M^+$ ).

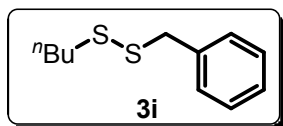

Compound **3i**<sup>[6]</sup>: The reaction was conducted according to the general procedure. After the reaction was finished, DDQ (27.2 mg, 0.12 mmol, 0.6 equiv.) was added. The reaction system was stirred at room temperature for 4 hours before it was concentrated under vacuum. Purification by column chromatography afforded the title product (32.7 mg, 0.154mmol, 77%) as a red oil. **<sup>1</sup>H NMR** (400 MHz, CDCl<sub>3</sub>) δ 7.26-7.17 (m, 5H), 3.8 (s, 2H), 2.32 (t, *J* = 7.2 Hz, 2H), 1.49-1.42 (m, 2H), 1.28-1.19 (m, 2H), 0.78 (t, *J* = 7.2, 3H); **<sup>13</sup>C NMR** (100 MHz, CDCl<sub>3</sub>) δ 137.59, 129.25, 128.43, 127.31, 43.69, 38.33, 31.07, 21.57, 13.61; **IR** (film) 3032, 2946, 1598, 1453, 1279, 1216, 1069, 911, 761, 698 cm<sup>-1</sup>; **MS (EI)** *m/z* 212 (M<sup>+</sup>).

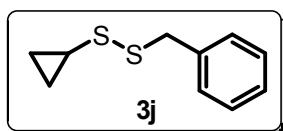

Compound **3j**: The reaction was conducted according to the general procedure. After the reaction was finished, DDQ (27.2 mg, 0.12 mmol, 0.6 equiv.) was added. The reaction system was stirred at room temperature for 4 hours before it was concentrated under vacuum. Purification by column chromatography afforded the title product (34.5 mg, 0.176mmol, 88%) as a colorless oil. **<sup>1</sup>H NMR** (400 MHz, CDCl<sub>3</sub>) δ 7.40-7.28 (m, 5H), 3.99 (s, 2H), 1.91-1.85 (m, 1H), 0.87-0.82 (m, 2H), 0.65-0.61 (m, 2H); **<sup>13</sup>C NMR** (100 MHz, CDCl<sub>3</sub>) δ 137.71, 129.32, 128.44, 127.29, 43.28, 18.63, 9.61; **IR** (film) 3071, 3021, 1598, 1493, 1451, 1420, 1272, 1230, 1192, 1060, 1024, 912, 868, 817, 764, 698 cm<sup>-1</sup>; **HRMS (EI)** Calcd for C<sub>10</sub>H<sub>12</sub>S<sub>2</sub> 196.0380, Found 196.0382.

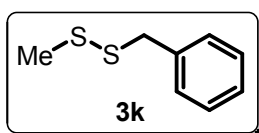

Compound **3k**<sup>[5]</sup>: The reaction was conducted according to the general procedure. After the reaction was finished, tri-*m*-tolylphosphine (36.5 mg, 0.12 mmol, 0.6 equiv.)

was added. The reaction system was stirred at room temperature for 4 hours before it was concentrated under vacuum. Purification by column chromatography afforded the title product (23.8 mg, 0.140mmol, 70%) as a colorless oil. **<sup>1</sup>H NMR** (400 MHz, CDCl<sub>3</sub>) δ 7.42-7.31 (m, 5H), 3.96 (s, 2H), 2.16 (s, 3H); **<sup>13</sup>C NMR** (100 MHz, CDCl<sub>3</sub>) δ 137.57, 129.35, 128.55, 127.42, 43.02, 23.02; **IR** (film) 3028, 2915, 1600, 1493, 1451, 1418, 1306, 1231, 1067, 1027, 953, 764, 698 cm<sup>-1</sup>; **MS (EI)** m/z 170 (M<sup>+</sup>).

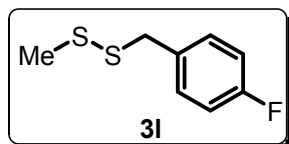

Compound **3l**: The reaction was conducted according to the general procedure. After the reaction was finished, DDQ (27.2 mg, 0.12 mmol, 0.6 equiv.) was added. The reaction system was stirred at room temperature for 4 hours before it was concentrated under vacuum. Purification by column chromatography afforded the title product (28.2 mg, 0.15 mmol, 75%) as a colorless oil. **<sup>1</sup>H NMR** (400 MHz, CDCl<sub>3</sub>) δ 7.33-7.29 (m, 2H), 7.04-6.99 (m, 2H), 3.87 (s, 2H), 2.12 (s, 3H); **<sup>19</sup>F NMR** (377 MHz, CDCl<sub>3</sub>) δ 114.96; **<sup>13</sup>C NMR** (100 MHz, CDCl<sub>3</sub>) δ 162.25 (d, <sup>1</sup>J<sub>C-F</sub> = 244.5 Hz), 133.37 (d, <sup>4</sup>J<sub>C-F</sub> = 3.1 Hz), 130.88 (d, <sup>3</sup>J<sub>C-F</sub> = 8.1 Hz), 115.43 (d, <sup>2</sup>J<sub>C-F</sub> = 21.3 Hz), 42.08, 23.06; **IR** (film) 2918, 1887, 1601, 1507, 1420, 1304, 1225, 1156, 1089, 1016, 952, 834, 749 cm<sup>-1</sup>; **HRMS (EI)** Calcd for C<sub>8</sub>H<sub>9</sub>FS<sub>2</sub> 188.0130, Found 188.0128.

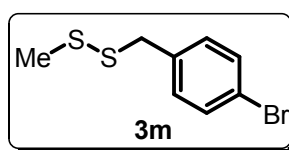

Compound **3m**: The reaction was conducted according to the general procedure. After the reaction was finished, DDQ (27.2 mg, 0.12 mmol, 0.6 equiv.) was added. The reaction system was stirred at room temperature for 4 hours before it was concentrated under vacuum. Purification by column chromatography afforded the title product (45.8 mg, 0.184 mmol, 92%) as a red oil. **<sup>1</sup>H NMR** (400 MHz, CDCl<sub>3</sub>) δ 7.45 (d, *J* = 8.4 Hz, 2H), 7.22 (d, *J* = 8.4 Hz, 2H), 3.84 (s, 2H), 2.14 (s, 3H); **<sup>13</sup>C NMR** (100 MHz, CDCl<sub>3</sub>) δ 135.88, 133.72, 128.90, 128.32, 37.78, 23.62; **IR** (film) 2914, 1897, 1652, 1585, 1485, 1412, 1412, 1305, 1195, 1070, 1011, 953, 874, 821, 729 cm<sup>-1</sup>;

**HRMS (EI)** Calcd for C<sub>8</sub>H<sub>9</sub>BrS<sub>2</sub> 247.9329, Found 247.9327.

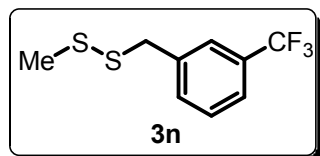

Compound **3n**: The reaction was conducted according to the general procedure. After the reaction was finished, DDQ (27.2 mg, 0.12 mmol, 0.6 equiv.) was added. The reaction system was stirred at room temperature for 4 hours before it was concentrated under vacuum. Purification by column chromatography afforded the title product (35.7 mg, 0.15 mmol, 75%) as a colorless oil. **<sup>1</sup>H NMR** (400 MHz, CDCl<sub>3</sub>) δ 7.61 (s, 1H), 7.56-7.53 (m, 2H), 7.47-7.43 (m, 1H), 3.93 (s, 2H), 2.11 (s, 3H); **<sup>19</sup>F NMR** (377 MHz, CDCl<sub>3</sub>) δ 62.62; **<sup>13</sup>C NMR** (100 MHz, CDCl<sub>3</sub>) δ 138.67, 132.61, 130.84 (q, <sup>2</sup>J<sub>C-F</sub> = 32.2 Hz), 128.95, 125.99 (q, <sup>3</sup>J<sub>C-F</sub> = 3.7 Hz), 124.16 (q, <sup>3</sup>J<sub>C-F</sub> = 3.7 Hz), 123.98 (q, <sup>1</sup>J<sub>C-F</sub> = 270.7 Hz), 42.24, 22.91; **IR** (film) 2923, 1735, 1448, 1330, 1169, 1128, 1077, 901, 803, 702 cm<sup>-1</sup>; **HRMS (EI)** Calcd for C<sub>9</sub>H<sub>9</sub>F<sub>3</sub>S<sub>2</sub> 238.0098, Found 238.0096.

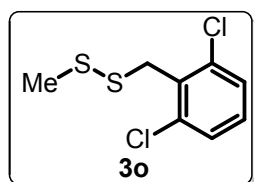

Compound **3o**: The reaction was conducted according to the general procedure. After the reaction was finished, DDQ (27.2 mg, 0.12 mmol, 0.6 equiv.) was added. The reaction system was stirred at room temperature for 4 hours before it was concentrated under vacuum. Purification by column chromatography afforded the title product (25.3 mg, 0.106 mmol, 53%) as a colorless oil. **<sup>1</sup>H NMR** (400 MHz, CDCl<sub>3</sub>) δ 7.32 (d, *J* = 8.0 Hz, 2H), 7.15 (dd, *J* = 8.4 Hz, *J* = 7.6 Hz, 1H), 4.29 (s, 2H), 2.36 (s, 3H), **<sup>13</sup>C NMR** (100 MHz, CDCl<sub>3</sub>) δ 135.88, 133.72, 128.90, 128.32, 37.79, 23.62; **IR** (film) 2917, 1565, 1432, 1304, 1215, 1090, 953, 874, 768 cm<sup>-1</sup>; **HRMS (EI)** Calcd for C<sub>8</sub>H<sub>8</sub>Cl<sub>2</sub>S<sub>2</sub> 237.9444, Found 237.9443.



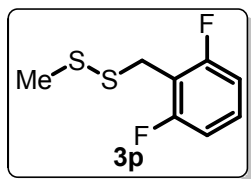

Compound **3p**: The reaction was conducted according to the general procedure. After the reaction was finished, DDQ (27.2 mg, 0.12 mmol, 0.6 equiv.) was added. The reaction system was stirred at room temperature for 4 hours before it was concentrated under vacuum. Purification by column chromatography afforded the title product (21.0 mg, 0.102 mmol, 51%) as a yellow oil. **<sup>1</sup>H NMR** (400 MHz, CDCl<sub>3</sub>) δ 7.31-7.24 (m, 1H), 6.97-6.91 (m, 2H), 4.03 (s, 2H), 2.32 (s, 3H); **<sup>19</sup>F NMR** (377 MHz, CDCl<sub>3</sub>) δ 114.50; **<sup>13</sup>C NMR** (100 MHz, CDCl<sub>3</sub>) δ 161.48 (dd, <sup>1</sup>J<sub>C-F</sub> = 247.9 Hz, <sup>3</sup>J<sub>C-F</sub> = 7.7 Hz), 129.01 (t, <sup>3</sup>J<sub>C-F</sub> = 10.1 Hz), 114.06 (t, <sup>2</sup>J<sub>C-F</sub> = 18.9 Hz), 111.19 (dd, <sup>2</sup>J<sub>C-F</sub> = 219.0 Hz, <sup>4</sup>J<sub>C-F</sub> = 6.3 Hz), 28.93, 22.99; **IR** (film) 2919, 1624, 1589, 1470, 1422, 1271, 1235, 1170, 1059, 995, 955, 786, 736, 694 cm<sup>-1</sup>; **HRMS (EI)** Calcd for C<sub>8</sub>H<sub>8</sub>F<sub>2</sub>S<sub>2</sub> 206.0035, Found 206.0034.

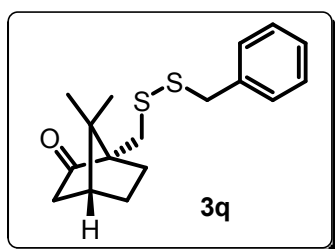

Compound **3q**: To a Schlenk tube were added BnS<sub>2</sub>O<sub>3</sub>Na (1.0 mmol, 5.0 equiv.), the sodium sulfinate (0.2 mmol, 1.0 equiv.) and 1,4-dioxane (1.0 mL), the mixture was stirred at 110 °C (reflux) for 11 hours. After the reaction was finished, The mixture was concentrated and purified by column chromatography to afford the desired product (38.0 mg, 0.124 mmol, 62%) as a colorless oil. **<sup>1</sup>H NMR** (400 MHz, CDCl<sub>3</sub>) δ 7.33-7.20 (m, 5H), 3.88 (s, 2H), 2.84 (d, *J* = 13.2 Hz, 1H), 2.55 (d, *J* = 13.2 Hz, 1H), 2.27 (ddd, *J* = 18.4, 4.7, 1.8 Hz, 1H), 2.00-1.97 (m, 1H), 1.92-1.88 (m, 2H), 1.78 (d, *J* = 18.3 Hz, 1H), 1.50-1.43 (m, 1H), 1.36-1.28 (m, 1H), 0.88 (s, 3H), 0.76 (s, 3H); **<sup>13</sup>C NMR** (100 MHz, CDCl<sub>3</sub>) δ 216.76, 137.55, 129.37, 128.46, 127.30, 61.12, 47.72, 43.50, 43.40, 42.97, 38.17, 26.77, 26.38, 20.03, 19.93; **IR** (film) 2956, 1739, 1453, 1239, 1045, 912, 764, 732, 697 cm<sup>-1</sup>; **HRMS (EI)** Calcd for C<sub>17</sub>H<sub>22</sub>OS<sub>2</sub> 306.1112,

Found 306.1110.

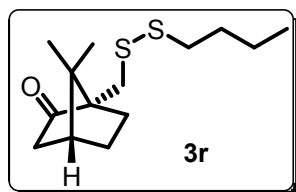

Compound **3r**: To a Schlenk tube were added  $n\text{BuS}_2\text{O}_3\text{Na}$  (1.0 mmol, 5.0 equiv.), the sodium sulfinate (0.2 mmol, 1.0 equiv.) and 1,4-dioxane (1.0 mL), the mixture was stirred at 110 °C (reflux) for 11 hours. After the reaction was finished, The mixture was concentrated and purified by column chromatography to afford the desired product (34.8 mg, 0.128 mmol, 64%) as a colorless oil.  **$^1\text{H}$  NMR** (400 MHz,  $\text{CDCl}_3$ )  $\delta$  3.18 (d,  $J$  = 13.2 Hz, 1H), 2.75-2.69 (m, 3H), 2.38-2.32 (m, 1H), 2.10-1.98 (m, 3H), 1.85 (d,  $J$  = 18.3 Hz, 1H), 1.71-1.63 (m, 2H), 1.60-1.54 (m, 1H), 1.45-1.35 (m, 3H), 1.04 (s, 3H), 0.93-0.89 (m, 6H);  **$^{13}\text{C}$  NMR** (100 MHz,  $\text{CDCl}_3$ )  $\delta$  216.95, 61.26, 47.77, 43.49, 43.01, 38.95, 38.50, 31.14, 26.79, 26.51, 21.59, 20.17, 20.10, 13.65; **IR** (film) 2954, 1741, 1416, 1045  $\text{cm}^{-1}$ ; **HRMS (EI)** Calcd for  $\text{C}_{14}\text{H}_{24}\text{OS}_2$  272.1269, Found 272.1269.

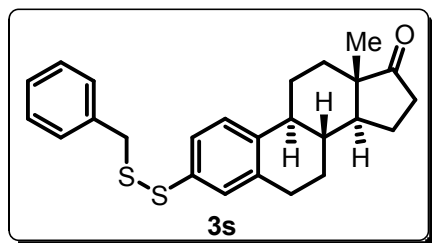

Compound **3s**: To a Schlenk tube were added  $\text{BnS}_2\text{O}_3\text{Na}$  (0.7 mmol, 5.0 equiv.), the sodium sulfinate (0.14 mmol, 1.0 equiv.) and 1,4-dioxane (0.7 mL), the mixture was stirred at 110 °C (reflux) for 11 hours. After the reaction was finished, The mixture was concentrated and purified by column chromatography to afford the desired product (35.4 mg, 0.0868 mmol, 62%) as a yellow solid.  **$^1\text{H}$  NMR** (400 MHz,  $\text{CDCl}_3$ )  $\delta$  7.24-7.12 (m, 7H), 7.05 (s, 1H), 3.86 (s, 2H), 2.78 (dd,  $J$  = 8.8, 4.2 Hz, 2H), 2.45 (dd,  $J$  = 19.0, 8.8 Hz, 1H), 2.23-2.16 (m, 1H), 2.19 (td,  $J$  = 10.7, 4.0 Hz, 1H), 2.11-1.88 (m, 4H), 1.60-1.30 (m, 6H), 0.83 (s, 3H);  **$^{13}\text{C}$  NMR** (100 MHz,  $\text{CDCl}_3$ )  $\delta$  220.61, 138.94, 137.38, 136.79, 133.97, 129.34, 128.68, 128.48, 127.43, 126.00,

125.71, 50.44, 47.89, 44.22, 43.47, 38.00, 35.79, 31.52, 29.26, 26.33, 25.65, 21.54, 13.79; **IR** (film) 2928, 1737, 1561, 1436, 1088, 1007, 909, 817, 778, 761, 733  $\text{cm}^{-1}$ ; **HRMS (EI)** Calcd for  $\text{C}_{25}\text{H}_{28}\text{OS}_2$  408.1582, Found 408.1580.

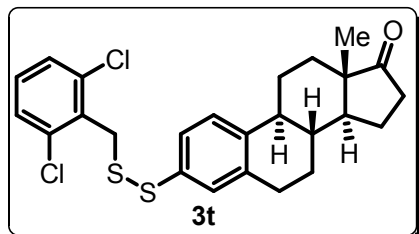

Compound **3t**: To a Schlenk tube were added sodium 2,6-dichlorobenzyl sulfonate (0.35 mmol, 5.0 equiv.), the sodium sulfinate (0.07 mmol, 1.0 equiv.) and 1,4-dioxane (0.7 mL), the mixture was stirred at 110 °C (reflux) for 11 hours. After the reaction was finished, The mixture was concentrated and purified by column chromatography to afford the desired product (16.7 mg, 0.035 mmol, 50%) as a yellow solid. **<sup>1</sup>H NMR** (400 MHz,  $\text{CDCl}_3$ )  $\delta$  7.21-7.12 (m, 5H), 7.05-7.01 (m, 1H), 4.26 (s, 2H), 2.81 (dd,  $J$  = 8.9, 4.2 Hz, 2H), 2.44 (dd,  $J$  = 19.0, 8.9 Hz, 1H), 2.36-2.31 (m, 1H), 2.23-2.17 (m, 1H), 2.13-1.88 (m, 4H), 1.61-1.33 (m, 6H), 0.85 (s, 3H); **<sup>13</sup>C NMR** (100 MHz,  $\text{CDCl}_3$ )  $\delta$  220.76, 138.70, 137.26, 136.02, 134.09, 133.08, 128.97, 128.27, 127.91, 125.90, 125.08, 50.45, 47.94, 44.24, 38.80, 38.05, 35.82, 31.53, 29.30, 26.38, 25.70, 21.57, 13.80; **IR** (film) 2928, 1737, 1561, 1436, 1088, 1007, 909, 817, 778, 761, 733  $\text{cm}^{-1}$ ; **HRMS (EI)** Calcd for  $\text{C}_{25}\text{H}_{26}\text{Cl}_2\text{OS}_2$  476.0802, Found 476.0805.

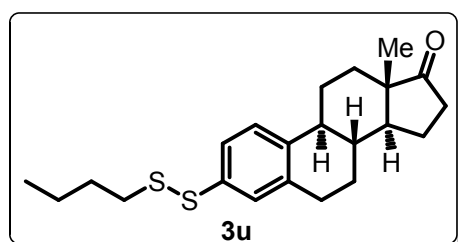

Compound **3u**: To a Schlenk tube were added sodium S-2,6-dichlorobenzyl sulfonate (0.35 mmol, 5.0 equiv.), the sodium sulfinate (0.07 mmol, 1.0 equiv.) and 1,4-dioxane (0.7 mL), the mixture was stirred at 110 °C (reflux) for 11 hours. After the reaction was finished, the mixture was concentrated and purified by column chromatography to afford the desired product (14.4 mg, 0.0385 mmol, 55%) as a yellow solid. **<sup>1</sup>H NMR** (400 MHz,  $\text{CDCl}_3$ )  $\delta$  7.25 (dd,  $J$  = 8.1, 2.0 Hz, 1H), 7.19-7.17

(m, 2H), 2.84 (dd,  $J = 8.9, 4.2$  Hz, 2H), 2.67 (t,  $J = 7.4$  Hz, 2H), 2.44 (dd,  $J = 19.0, 8.9$  Hz, 1H), 2.36-2.31 (m, 1H), 2.22 (td,  $J = 10.6, 4.3$  Hz, 1H), 2.12-1.88 (m, 4H), 1.63-1.56 (m, 3H), 1.48-1.40 (m, 4H), 1.38-1.28 (m, 3H), 0.84-0.81 (m, 6H);  $^{13}\text{C}$  **NMR** (100 MHz,  $\text{CDCl}_3$ )  $\delta$  220.76, 138.73, 137.42, 134.57, 128.23, 126.05, 125.28, 50.45, 47.93, 44.24, 38.58, 38.04, 35.82, 31.53, 30.83, 29.34, 26.37, 25.68, 21.60, 21.56, 13.81, 13.63; **IR** (film) 2927, 1735, 1456, 910, 733  $\text{cm}^{-1}$ ; **HRMS (EI)** Calcd for  $\text{C}_{22}\text{H}_{30}\text{OS}_2$  374.1738, Found 374.1740.

## V. X-ray Crystallography Analysis of Compound 2i, 4 and 5

Compound **2i** (CCDC-1017450):

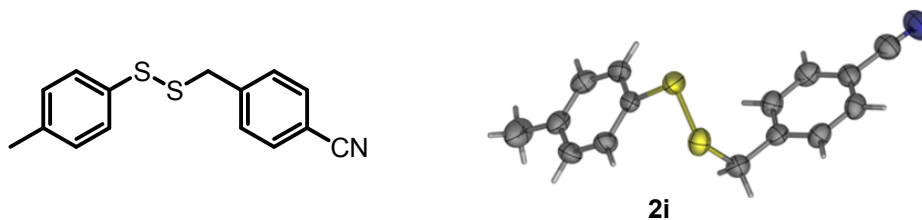

### Datablock: z

|                        |                                        |                                 |
|------------------------|----------------------------------------|---------------------------------|
| Bond precision:        | C-C = 0.0035 Å                         | Wavelength=0.71073              |
| Cell:                  | a=6.1546(2) b=15.4938(6) c=28.9800(11) |                                 |
|                        | alpha=90 beta=90 gamma=90              |                                 |
| Temperature: 296 K     |                                        |                                 |
|                        | Calculated                             | Reported                        |
| Volume                 | 2763.48(17)                            | 2763.48(17)                     |
| Space group            | P b c a                                | Pbca                            |
| Hall group             | -P 2ac 2ab                             | ?                               |
| Moiety formula         | C15 H13 N S2                           | ?                               |
| Sum formula            | C15 H13 N S2                           | C15 H13 N S2                    |
| Mr                     | 271.40                                 | 271.38                          |
| Dx, g cm <sup>-3</sup> | 1.305                                  | 1.305                           |
| Z                      | 8                                      | 8                               |
| Mu (mm <sup>-1</sup> ) | 0.366                                  | 0.366                           |
| F000                   | 1136.0                                 | 1136.0                          |
| F000'                  | 1138.29                                |                                 |
| h, k, lmax             | 7, 18, 34                              | 7, 18, 34                       |
| Nref                   | 2441                                   | 2439                            |
| Tmin, Tmax             | 0.932, 0.954                           | 0.911, 0.954                    |
| Tmin'                  | 0.909                                  |                                 |
| Correction method=     | MULTI-SCAN                             |                                 |
| Data completeness=     | 0.999                                  | Theta(max)= 25.010              |
| R(reflections)=        | 0.0380( 1730)                          | WR2(reflections)= 0.1029( 2439) |
| S =                    | 1.021                                  | Npar= Npar = 163                |

The following ALERTS were generated. Each ALERT has the format

**test-name\_ALERT\_alert-type\_alert-level.**

Click on the hyperlinks for more details of the test.

#### ●Alert level C

ABSTY02\_ALERT\_1\_C An \_exptl\_absorpt\_correction\_type has been given without a literature citation. This should be contained in the \_exptl\_absorpt\_process\_details field.  
Absorption correction given as multi-scan

#### ●Alert level G

PLAT005\_ALERT\_5\_G No \_jucr\_refine\_instructions\_details in the CIF Please Do !  
PLAT066\_ALERT\_1\_G Predicted and Reported Tmin&Tmax Range Identical ? Check  
PLAT710\_ALERT\_4\_G Delete 1-2-3 or 2-3-4 Linear Torsion Angle ... # 27 Do !  
C2 -C3 -C14 -N1 -78.00 11.00 1.555 1.555 1.555 1.555  
PLAT710\_ALERT\_4\_G Delete 1-2-3 or 2-3-4 Linear Torsion Angle ... # 28 Do !  
C4 -C3 -C14 -N1 98.00 11.00 1.555 1.555 1.555 1.555

- 0 **ALERT level A** = Most likely a serious problem - resolve or explain
- 0 **ALERT level B** = A potentially serious problem, consider carefully
- 1 **ALERT level C** = Check. Ensure it is not caused by an omission or oversight
- 4 **ALERT level G** = General information/check it is not something unexpected

- 2 ALERT type 1 CIF construction/syntax error, inconsistent or missing data
- 0 ALERT type 2 Indicator that the structure model may be wrong or deficient
- 0 ALERT type 3 Indicator that the structure quality may be low
- 2 ALERT type 4 Improvement, methodology, query or suggestion
- 1 ALERT type 5 Informative message, check

Compound 4 (CCDC-1017451):

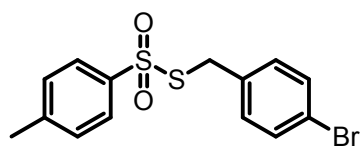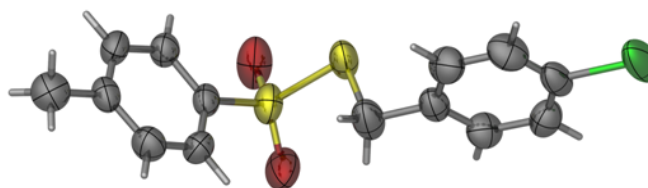

4

## Datablock: z

|                        |                                           |                                 |
|------------------------|-------------------------------------------|---------------------------------|
| Bond precision:        | C-C = 0.0056 Å                            | Wavelength=0.71073              |
| Cell:                  | a=10.1609(11) b=14.3305(15) c=10.5313(11) |                                 |
|                        | alpha=90 beta=94.541(4) gamma=90          |                                 |
| Temperature: 296 K     |                                           |                                 |
| Volume                 | Calculated 1528.7(3)                      | Reported 1528.7(3)              |
| Space group            | P 21/n                                    | P2(1)/n                         |
| Hall group             | -P 2yn                                    | ?                               |
| Moiety formula         | C14 H13 Br O2 S2                          | ?                               |
| Sum formula            | C14 H13 Br O2 S2                          | C14 H13 Br O2 S2                |
| Mr                     | 357.28                                    | 357.27                          |
| Dx, g cm <sup>-3</sup> | 1.552                                     | 1.552                           |
| Z                      | 4                                         | 4                               |
| Mu (mm <sup>-1</sup> ) | 2.956                                     | 2.956                           |
| F000                   | 720.0                                     | 720.0                           |
| F000'                  | 720.11                                    |                                 |
| h, k, lmax             | 12, 17, 12                                | 12, 17, 12                      |
| Nref                   | 2687                                      | 2684                            |
| Tmin, Tmax             | 0.629, 0.661                              | 0.649, 0.682                    |
| Tmin'                  | 0.617                                     |                                 |
| Correction method=     | MULTI-SCAN                                |                                 |
| Data completeness=     | 0.999                                     | Theta(max)= 25.000              |
| R(Reflections)=        | 0.0406( 1963)                             | wR2(Reflections)= 0.0990( 2684) |
| S =                    | 0.983                                     | Npar= Npar = 172                |

The following ALERTS were generated. Each ALERT has the format  
[test-name\\_ALERT\\_alert-type\\_alert-level](#).  
 Click on the hyperlinks for more details of the test.

### Alert level C

PLAT241\_ALERT\_2\_C High Ueq as Compared to Neighbors for ..... C7 Check  
 PLAT242\_ALERT\_2\_C Low Ueq as Compared to Neighbors for ..... C11 Check  
 PLAT334\_ALERT\_2\_C Small Average Benzene C-C Dist. CB -C13 1.37 Ang.

### Alert level G

PLAT005\_ALERT\_5\_G No \_jucc\_refine\_instructions\_details in the CIF Please Do !  
 PLAT380\_ALERT\_4\_G Incorrectly? Oriented X(sp2)-Methyl Moiety ..... C14 Check

0 ALERT level A = Most likely a serious problem - resolve or explain  
 0 ALERT level B = A potentially serious problem, consider carefully  
 3 ALERT level C = Check. Ensure it is not caused by an omission or oversight  
 2 ALERT level G = General information/check it is not something unexpected

0 ALERT type 1 CIF construction/syntax error, inconsistent or missing data  
 3 ALERT type 2 Indicator that the structure model may be wrong or deficient  
 0 ALERT type 3 Indicator that the structure quality may be low  
 1 ALERT type 4 Improvement, methodology, query or suggestion  
 1 ALERT type 5 Informative message, check

Compound **5** (CCDC-1017452):

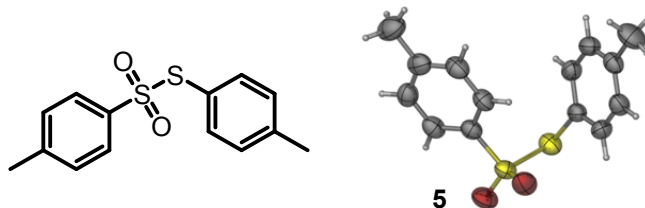

## Datablock: z

|                        |                                               |                                  |
|------------------------|-----------------------------------------------|----------------------------------|
| Bond precision:        | C-C = 0.0056 Å                                | Wavelength=0.71073               |
| Cell:                  | a=15.245 (4)    b=6.6576 (17)    c=15.228 (4) |                                  |
|                        | alpha=90    beta=118.268 (7)    gamma=90      |                                  |
| Temperature:           | 296 K                                         |                                  |
| Volume                 | Calculated<br>1361.3 (6)                      | Reported<br>1361.3 (6)           |
| Space group            | P 21/c                                        | P2 (1) / c                       |
| Hall group             | -P 2ybc                                       | ?                                |
| Moiety formula         | C14 H14 O2 S2                                 | ?                                |
| Sum formula            | C14 H14 O2 S2                                 | C14 H14 O2 S2                    |
| Mr                     | 278.39                                        | 278.37                           |
| Dx, g cm <sup>-3</sup> | 1.358                                         | 1.358                            |
| Z                      | 4                                             | 4                                |
| Mu (mm <sup>-1</sup> ) | 0.382                                         | 0.382                            |
| F000                   | 584.0                                         | 584.0                            |
| F000'                  | 585.21                                        |                                  |
| h, k, lmax             | 18, 7, 18                                     | 18, 7, 18                        |
| Nref                   | 2383                                          | 2380                             |
| Tmin, Tmax             | 0.925, 0.959                                  | 0.881, 0.959                     |
| Tmin'                  | 0.878                                         |                                  |
| Correction method=     | MULTI-SCAN                                    |                                  |
| Data completeness=     | 0.999                                         | Theta(max)= 25.010               |
| R(reflections)=        | 0.0473 ( 1531)                                | wR2(reflections)= 0.1301 ( 2380) |
| S =                    | 1.032                                         | Npar= Npar = 163                 |

The following ALERTS were generated. Each ALERT has the format  
[test-name\\_ALERT\\_alert-type\\_alert-level](#).  
 Click on the hyperlinks for more details of the test.

### Alert level C

PLAT340\_ALERT\_3\_C Low Bond Precision on C-C Bonds ..... 0.0056 Ang.

### Alert level G

PLAT005\_ALERT\_5\_G No \_jucr\_refine\_instructions\_details in the CIF Please Do !  
 PLAT066\_ALERT\_1\_G Predicted and Reported Tmin&Tmax Range Identical ? Check  
 PLAT380\_ALERT\_4\_G Incorrectly? Oriented X(sp2)-Methyl Moiety ..... C13 Check  
 PLAT380\_ALERT\_4\_G Incorrectly? Oriented X(sp2)-Methyl Moiety ..... C14 Check

0 **ALERT level A** = Most likely a serious problem - resolve or explain  
 0 **ALERT level B** = A potentially serious problem, consider carefully  
 1 **ALERT level C** = Check. Ensure it is not caused by an omission or oversight  
 4 **ALERT level G** = General information/check it is not something unexpected

1 ALERT type 1 CIF construction/syntax error, inconsistent or missing data  
 0 ALERT type 2 Indicator that the structure model may be wrong or deficient  
 1 ALERT type 3 Indicator that the structure quality may be low  
 2 ALERT type 4 Improvement, methodology, query or suggestion  
 1 ALERT type 5 Informative message, check

All these data can be obtained free of charge from Cambridge Crystallographic Data Centre via [www.ccdc.cam.ac.uk/data\\_request/ci](http://www.ccdc.cam.ac.uk/data_request/ci).

## VI. Gram Scale Reaction

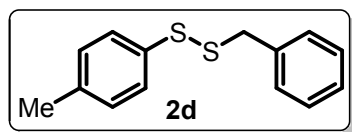

To a Schlenk tube were added  $\text{Na}_2\text{S}_2\text{O}_3 \cdot 5\text{H}_2\text{O}$  (1.24 g, 5.0 mmol, 5.0 equiv.),  $\text{BnCl}$  (580  $\mu\text{L}$ , 5.0 mmol, 5.0 equiv.),  $\text{EtOH}/\text{H}_2\text{O}$  (1.3 mL/2.5 mL), the mixture was stirred at reflux for 2 h under  $\text{N}_2$  atmosphere before the solvent was removed.  $\text{ToISO}_2\text{Na}$  (178.2 mg, 1.0 mmol, 1.0 equiv.), 1,4-dioxane (2.5 mL) were added, the mixture was stirred at 110 °C (reflux) for 11 hour. After the reaction was finished, DDQ (136 mg, 0.6 mmol, 0.6 equiv.) was added, the reaction system was stirred at room temperature for 4 hours before it was concentrated under vacuum. Purification by column chromatography afforded the title product **2d** (172.0 mg, 0.7 mmol, 70%) as a colorless solid.

To a Schlenk tube were added,  $\text{Na}_2\text{S}_2\text{O}_3 \cdot 5\text{H}_2\text{O}$  (12.4 g, 50 mmol, 5.0 equiv.),  $\text{BnCl}$  (5.8 mL, 50 mmol, 5.0 equiv.),  $\text{EtOH}/\text{H}_2\text{O}$  (12.5 mL/25 mL), the mixture was stirred at reflux for 2 h under  $\text{N}_2$  atmosphere, before the solvent was removed.  $\text{ToISO}_2\text{Na}$  (1.78 g, 10 mmol, 1.0 equiv.), 1,4-dioxane (25 mL or 13 mL) were added, the mixture was stirred at 110 °C (reflux) for 11 hours. After the reaction was finished, DDQ (1.36 g, 6.0 mmol, 0.6 equiv.) was added, the reaction system was stirred at room temperature for 4 hours before it was concentrated under vacuum. Purification by column chromatography afforded the title product **2d** (1.89 g, 7.7 mmol, 77%) as a colorless solid.



## VII. Control Experiments

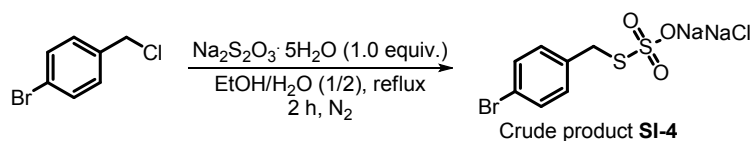

Prepared for **SI-4** following as step 1: To a Schlenk tube were added  $\text{Na}_2\text{S}_2\text{O}_3 \cdot 5\text{H}_2\text{O}$  (2.48 g, 10 mmol, 1.0 equiv.), 1-bromo-4-(chloromethyl)benzene (2.05 g, 10 mmol, 1.0 equiv.), EtOH/ $\text{H}_2\text{O}$  (2.5 mL/5.0 mL), the mixture was stirred at reflux for two hours under  $\text{N}_2$  atmosphere before the solvent was removed. The crude product **SI-4** was obtained as a white solid.

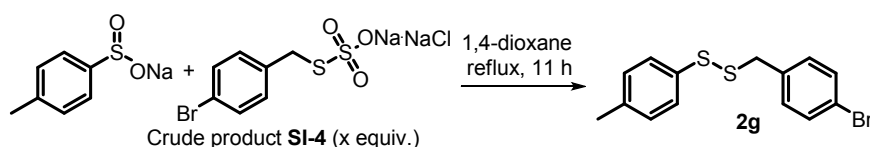

| Entry | <b>SI-5</b><br>/equiv. | Yield/% | Entry | <b>SI-5</b><br>/equiv. | Yield/% |
|-------|------------------------|---------|-------|------------------------|---------|
| 1[a]  | 1.0                    | 13      | 5     | 5.0                    | 75      |
| 2     | 2.0                    | 53      | 6     | 6.0                    | 75      |
| 3     | 3.0                    | 68      | 7     | 7.0                    | 72      |
| 4     | 4.0                    | 72      | 8     | 8.0                    | 64      |

[a] The yields of intermediates :  $\text{TolSO}_2\text{STol}$  (16%),  $4\text{-BrC}_6\text{H}_4\text{CH}_2\text{SSO}_2\text{Tol}$  (10%),  $(4\text{-BrC}_6\text{H}_4\text{CH}_2\text{SS})_2$  (34%)

Procedures of disulfide obtained by equivalents of halide and  $\text{Na}_2\text{S}_2\text{O}_3$ : To a Schlenk tube were added  $\text{TolSO}_2\text{Na}$  (0.2 mmol) and crude product **SI-4**, the mixture was stirred at 110 °C (reflux) for 11 hours before it was concentrated, purified by column chromatography to afford the desired product **2g**. When the amount of **SI-4** was 1.0 equiv., compound **2g** (13%), **4** (10%) and **5** (16%), **6** (34%) were obtained.

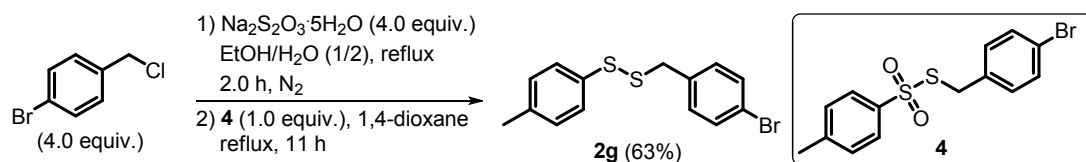

To a Schlenk tube were added  $\text{Na}_2\text{S}_2\text{O}_3 \cdot 5\text{H}_2\text{O}$  (198.6 mg, 0.8 mmol, 4.0 equiv.), 1-bromo-4-(chloromethyl)benzene (164.4 mg, 0.8 mmol, 4.0 equiv.), EtOH/ $\text{H}_2\text{O}$  (0.2 mL/0.4 mL), the mixture was stirred at reflux for two hours under  $\text{N}_2$  atmosphere, then the solvent was removed. Compound **4** (71.5 mg, 0.2 mmol, 1.0 equiv.) and 1,4-dioxane (1.0 mL) were added to the reaction, then the mixture was stirred at 110 °C

(reflux) for 11 hours before it was concentrated, purified by column chromatography to afford the desired product **2g** (40.9 mg, 0.126 mmol, 63%).

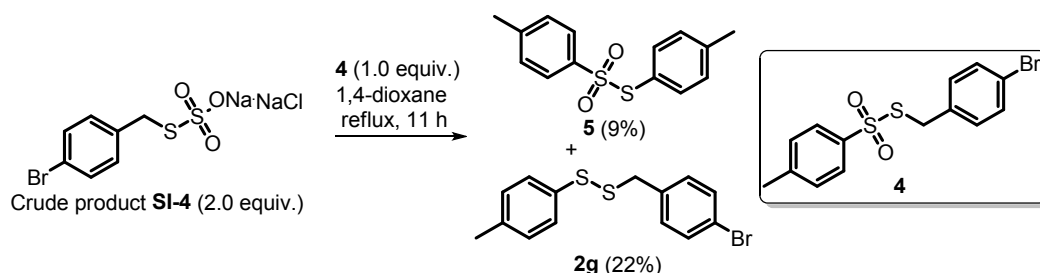

To a Schlenk tube were added **4** (71.5 mg, 0.2 mmol, 1.0 equiv.) and the crude **SI-4** (144.6 mg, 0.4 mmol, 1.0 equiv.), then the mixture was stirred at 110 °C (reflux) for 11 hours before it was concentrated, purified by column chromatography to afford the desired product. Compound **5** (2.5 mg, 0.009 mmol, 9%) and **2g** (14.3mg, 0.044 mmol, 22%) was obtained, starting material **4** (56%) was recovered simultaneously.

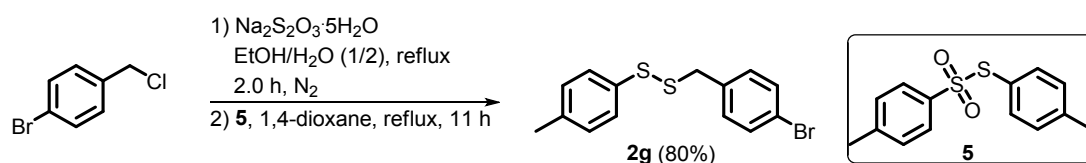

To a Schlenk tube were added  $\text{Na}_2\text{S}_2\text{O}_3 \cdot 5\text{H}_2\text{O}$  (248.2 mg, 1.0 mmol), 1-bromo-4-(chloromethyl)benzene (205.5 mg, 1.0 mmol), EtOH/ $\text{H}_2\text{O}$  (0.25 mL/0.5 mL), the mixture was stirred at reflux for 2 h under  $\text{N}_2$  atmosphere before the solvent was removed. **5** (27.8 mg, 0.1 mmol), 1,4-dioxane (1.0 mL) were added, the mixture was stirred at 110 °C (reflux) for 11 hours before it was concentrated, purified by column chromatography to afford the desired product **2g** (52.0 mg, 0.16 mmol, 80%).

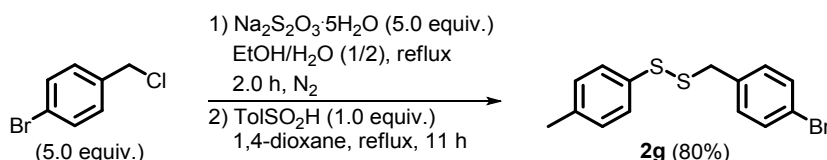

To a Schlenk tube were added  $\text{Na}_2\text{S}_2\text{O}_3 \cdot 5\text{H}_2\text{O}$  (248.2 mg, 1.0 mmol, 5.0 equiv.), 1-bromo-4-(chloromethyl)benzene (205.5 mg, 1.0 mmol, 5.0 equiv.), EtOH/ $\text{H}_2\text{O}$  (0.25 mL/0.5 mL), the mixture was stirred at reflux for 2 hours under  $\text{N}_2$  atmosphere, then removed the solvent.  $\text{ToISO}_2\text{H}$  (52.4 mg, 0.2 mmol, 1.0 equiv.), 1,4-dioxane (1.0 mL)

were added, the mixture was stirred at 110 °C (reflux) for 11 hours before it was concentrated, purified by column chromatography to afford the desired product **2g** (52.0 mg, 0.16 mmol, 80%).

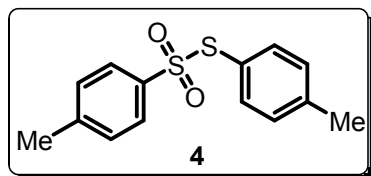

Compound **4**<sup>[7]</sup>: A colorless solid. **<sup>1</sup>H NMR** (400 MHz, CDCl<sub>3</sub>) δ 7.46 (dd, *J* = 8.4, 2.0 Hz, 2H), 7.25-7.20 (m, 4H), 7.14 (d, *J* = 8.0 Hz, 2H), 2.42 (s, 3H), 2.37 (s, 3H); **<sup>13</sup>C NMR** (100 MHz, CDCl<sub>3</sub>) δ 144.56, 142.01, 140.43, 136.45, 130.16, 129.33, 127.55, 124.56, 21.61, 21.43; **IR** (film) 2920, 1912, 1742, 1591, 1486, 1322, 1135, 1076, 883, 807, 737 cm<sup>-1</sup>; **MS (EI)** *m/z* 278 (M<sup>+</sup>).

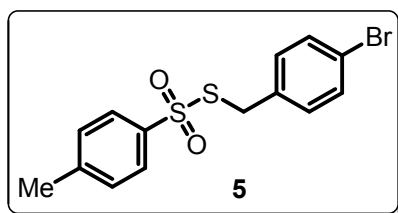

Compound **5**: To a 25 mL flask were added sodium 4-methylbenzenesulfonothioate<sup>[8]</sup> (526 mg, 2.5 mmol, 1.0 equiv.), 1-bromo-4-(chloro- methyl)benzene (565 mg, 2.75 mmol, 1.1 equiv.), TBAI (92 mg, 0.25 mmol, 0.1 equiv.) CH<sub>3</sub>CN (12 mL), the mixture was heated to 50 °C. After 24 hours, the mixture was cooled to room temperature, then concentrated, purified by column chromatography to afford the desired product (643.1 mg, 1.8 mmol, 72%) as a red solid. **<sup>1</sup>H NMR** (400 MHz, CDCl<sub>3</sub>) δ 7.68 (d, *J* = 8.4 Hz, 2H), δ 7.34 (d, *J* = 8.4 Hz, 2H), δ 7.27 (d, *J* = 8.4 Hz, 2H), δ 7.06 (d, *J* = 8.4 Hz, 2H), δ 4.22 (s, 2H), δ 2.47 (s, 3H); **<sup>13</sup>C NMR** (100 MHz, CDCl<sub>3</sub>) δ 144.80, 142.02, 132.96, 131.77, 130.69, 129.69, 126.94, 121.93, 39.61, 21.63; **IR** (film) 2923, 2857, 1592, 1485, 1406, 1323, 1139, 1075, 1013, 810, 708 cm<sup>-1</sup>; **HRMS (EI)** Calcd for C<sub>14</sub>H<sub>13</sub>BrO<sub>2</sub>S<sub>2</sub> 355.9540, Found 355.9539.

## VIII. References

1. Prepared for thiosulfate salts: (a) W. Fan, Y. Wu, X. K. Li, N. Yao, X. Li, Y. G. Yu and L. Hai, *Eur. J. Med. Chem.* 2011, **46**, 365; (b) J. T. Reeves, K. Camara, Z. S. Han, Y. Xu, H. Lee, C. A. Busacca and C. H. Senanayake, *Org. Lett.* 2014, **16**, 1196; (c) J. Yi, Y. Fu, B. Xiao, W. C. Cui and Q. X. Guo, *Tetrahedron Lett.*, 2011 , **52**, 205.
2. Prepared for sodium sulfinates salts: (a) X. Zhou, J. Luo, J. Liu, S. Peng and G. J. Deng, *Org. Lett.*, 2011, **13**, 1432; (b) Z. Huang and J. Xu, *RSC Adv.* 2013, **3**, 15114.
3. D. N. Harpp and R. A. Smith, *J. Am Chem. Soc.* 1982, **104**, 6045.
4. R.G. Hiskey and M.A. Harpold, *Tetrahedron*, 1967, **23**, 3923.
5. C. Remi, R. Martin, V. Pornrapee, B. Tore and R. Olof, *Chem. Comm.* 2008, **48**, 6603.
6. M. Arisawa and M. Yamaguchi, *J. Am Chem. Soc.* 2003, **125**, 6624.
7. F. L. Yang and S. K. Tian, *Angew. Chem., Int. Ed.* 2013, **52**, 4929.
8. (a) J. P. Harmon and L. Field, *J. Org. Chem.* 1986, **51**, 5235; (b) G. E. P. Kruger and T. Gunnlaugsson, *Dalton Trans.* 2011, **40**, 12310.

## IX. NMR Spectra

Compound **2a**:

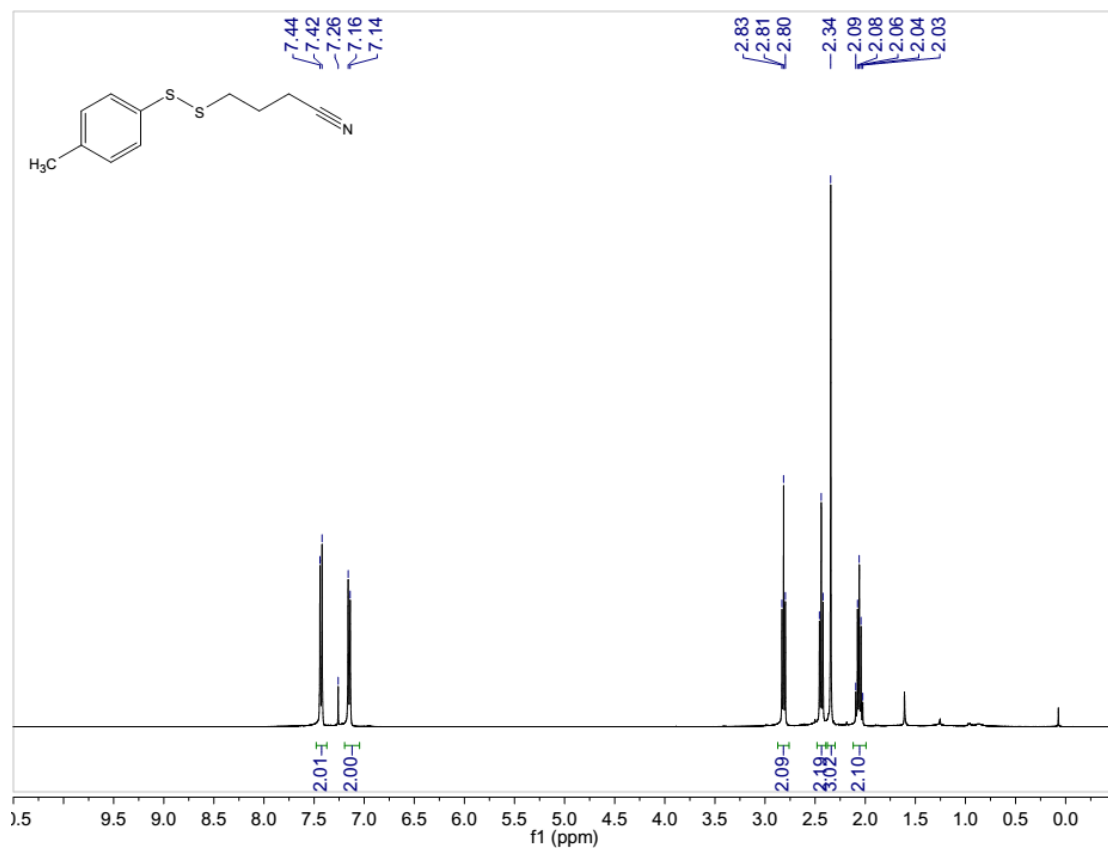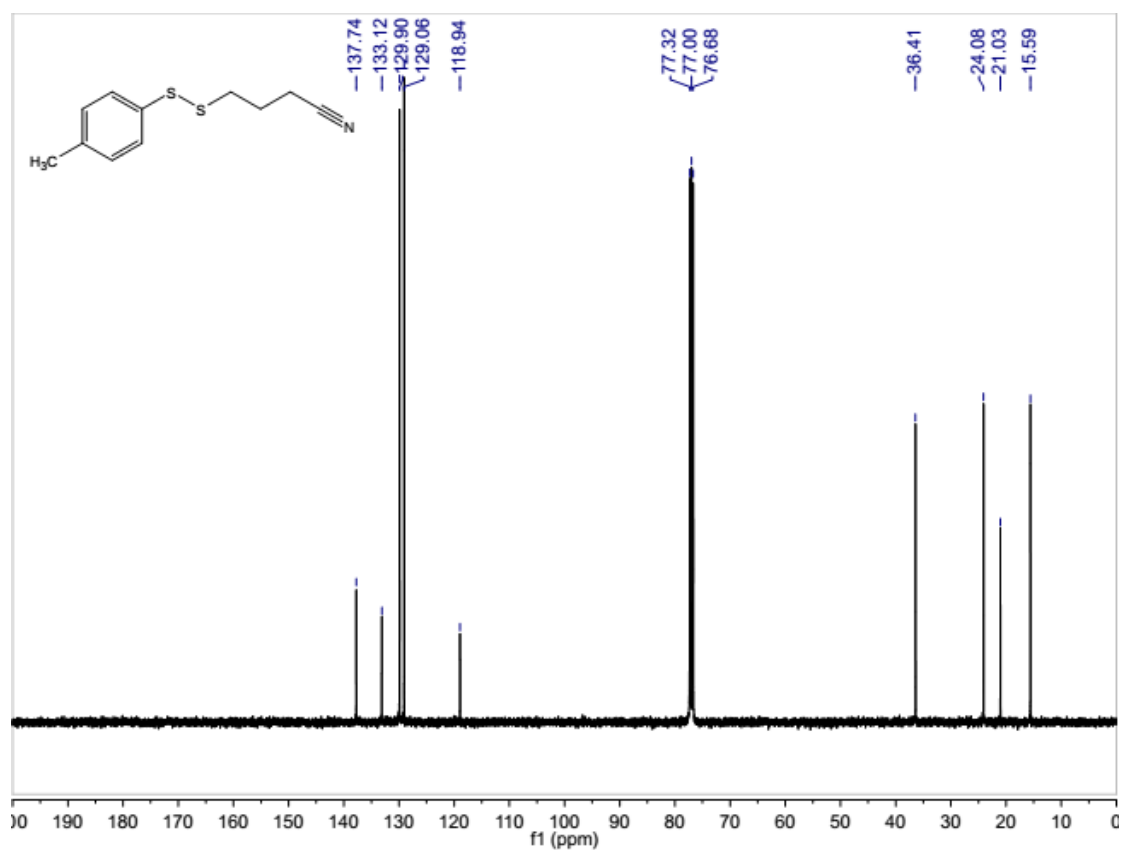

Compound **2b**:

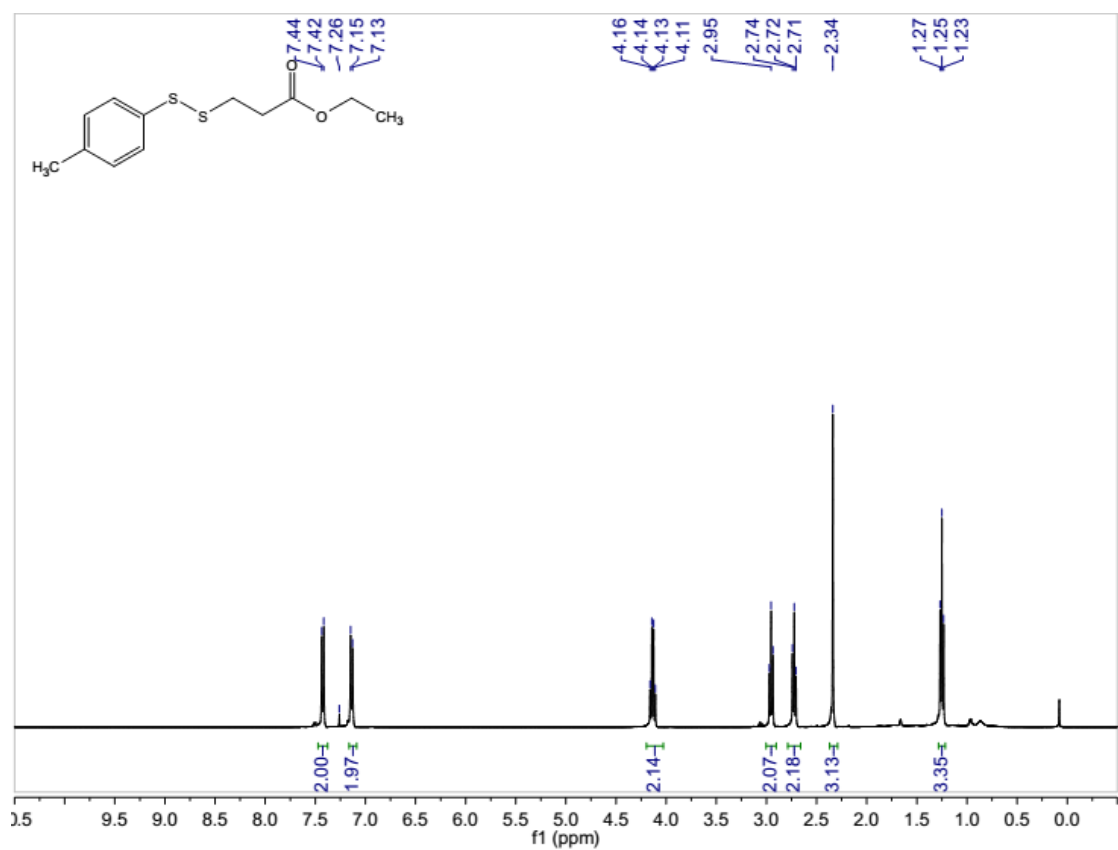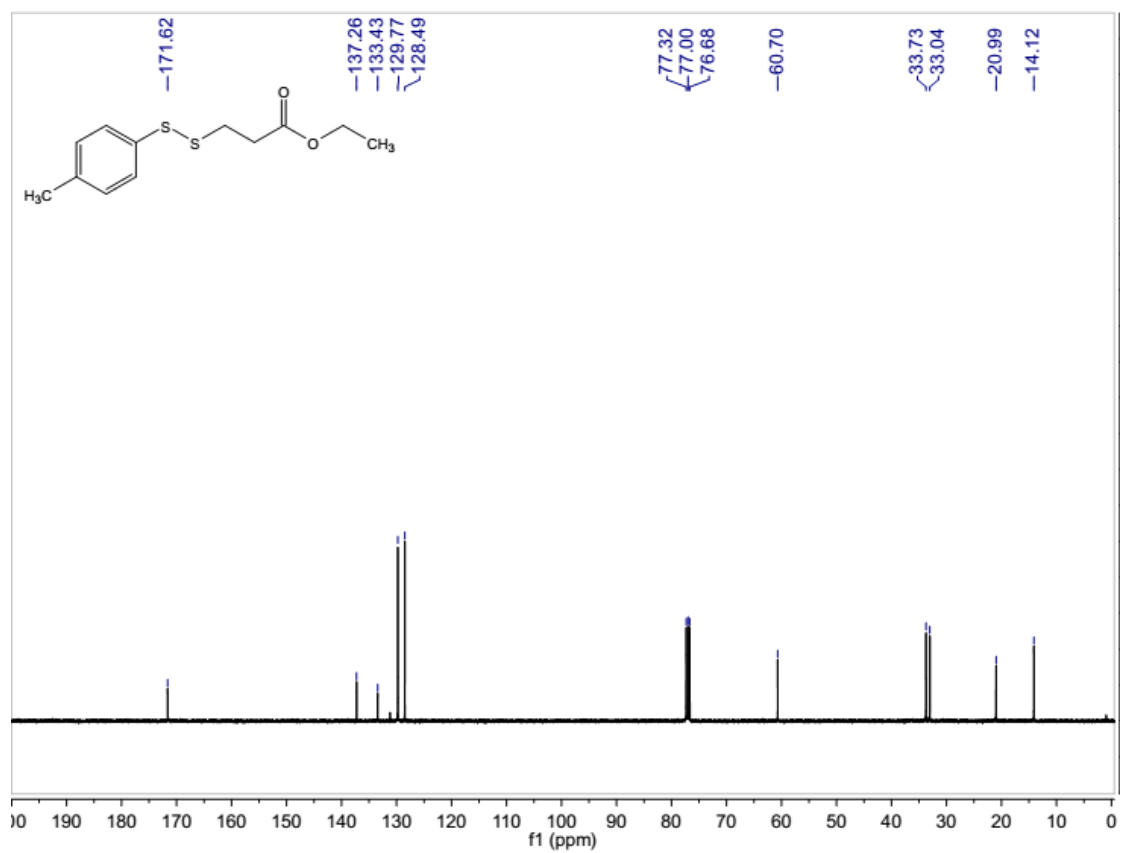

Compound 2c:

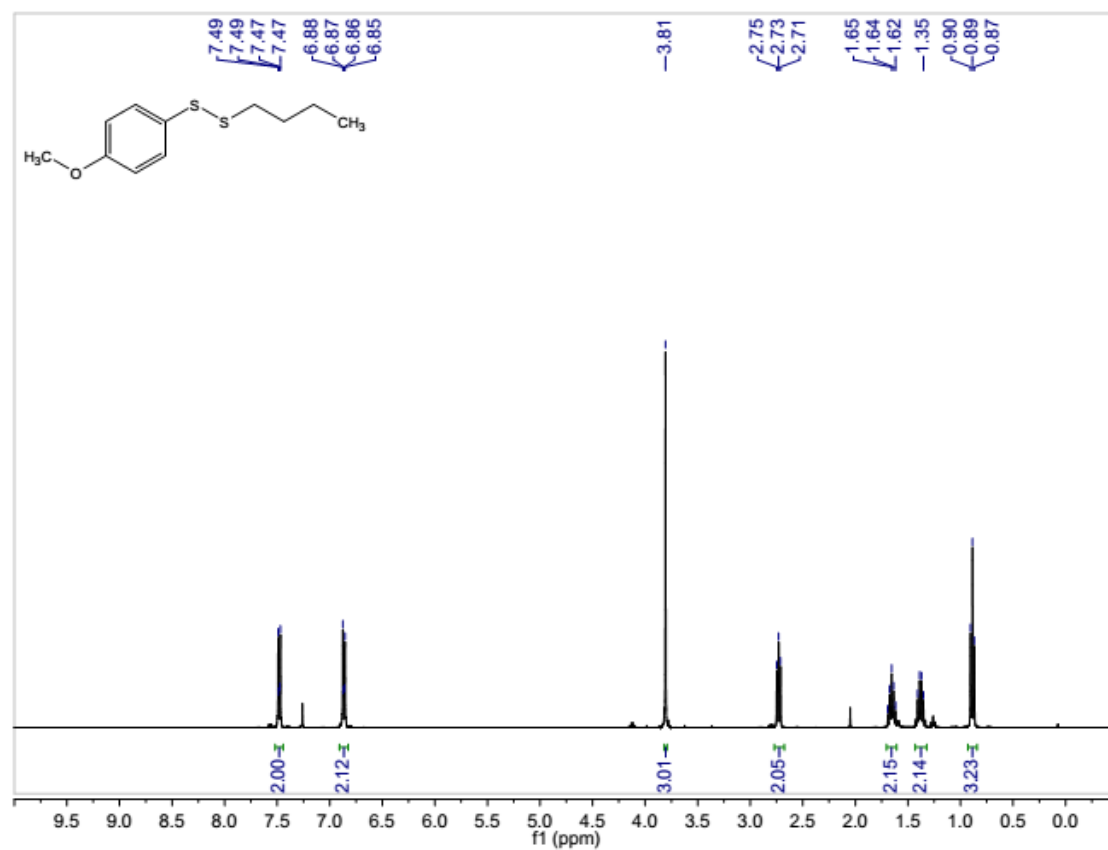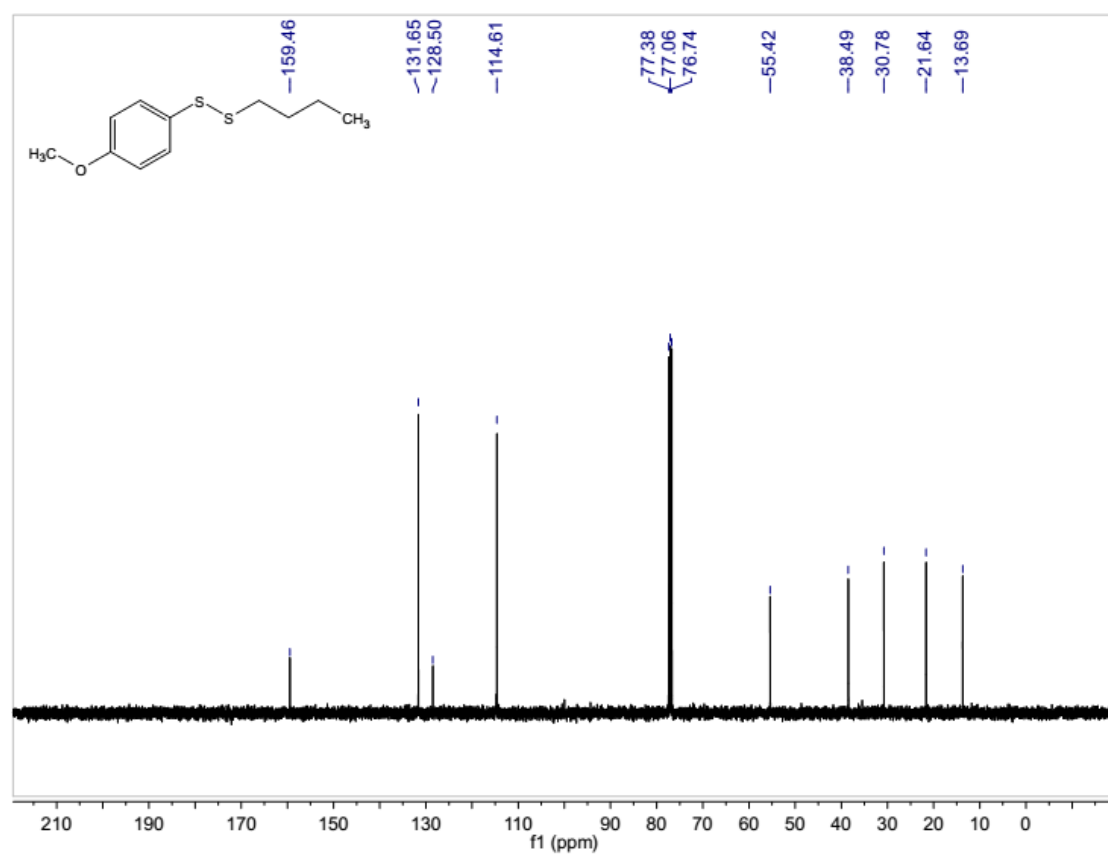

Compound **2d**:

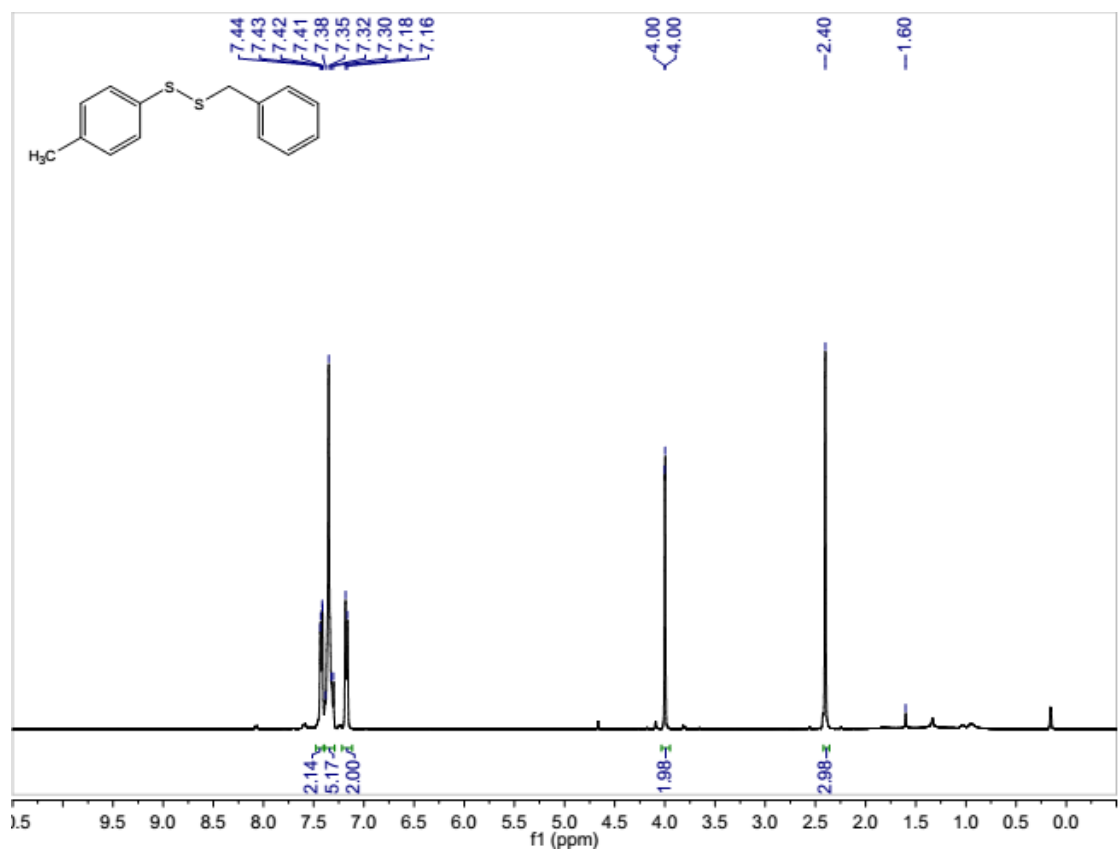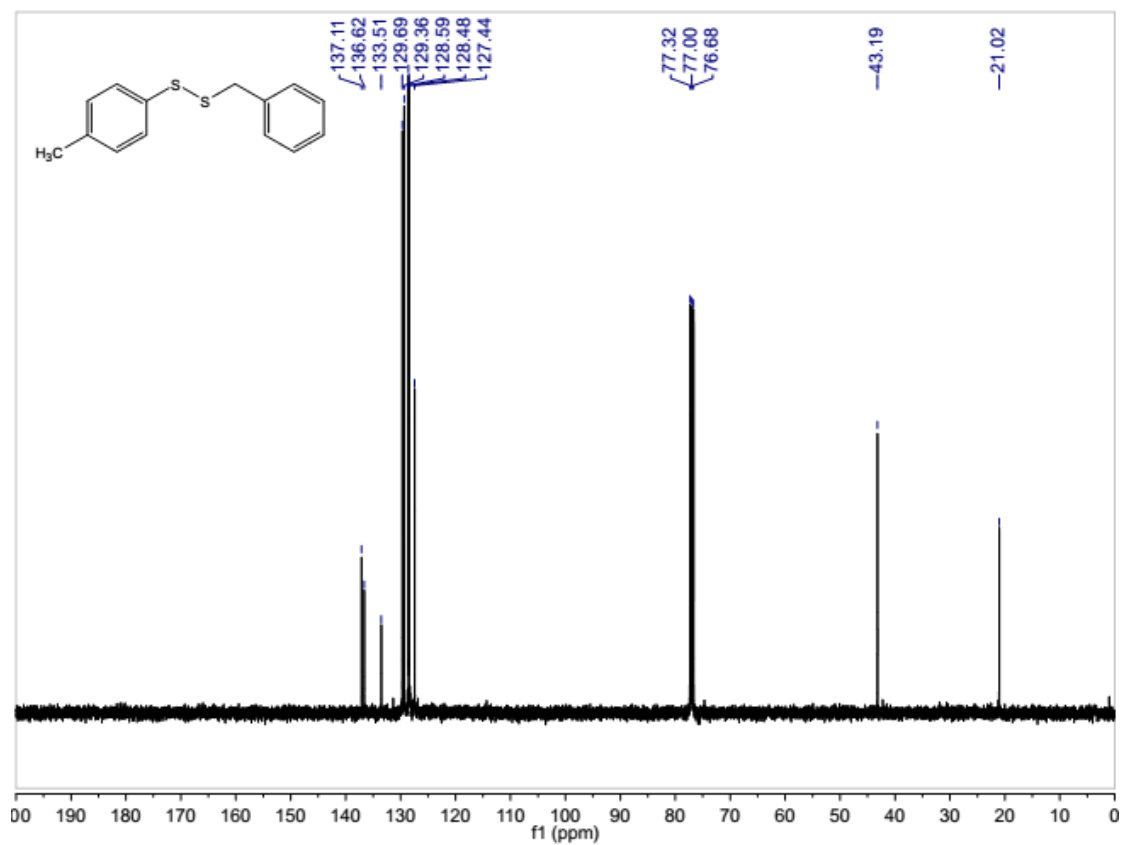



Compound 2e:

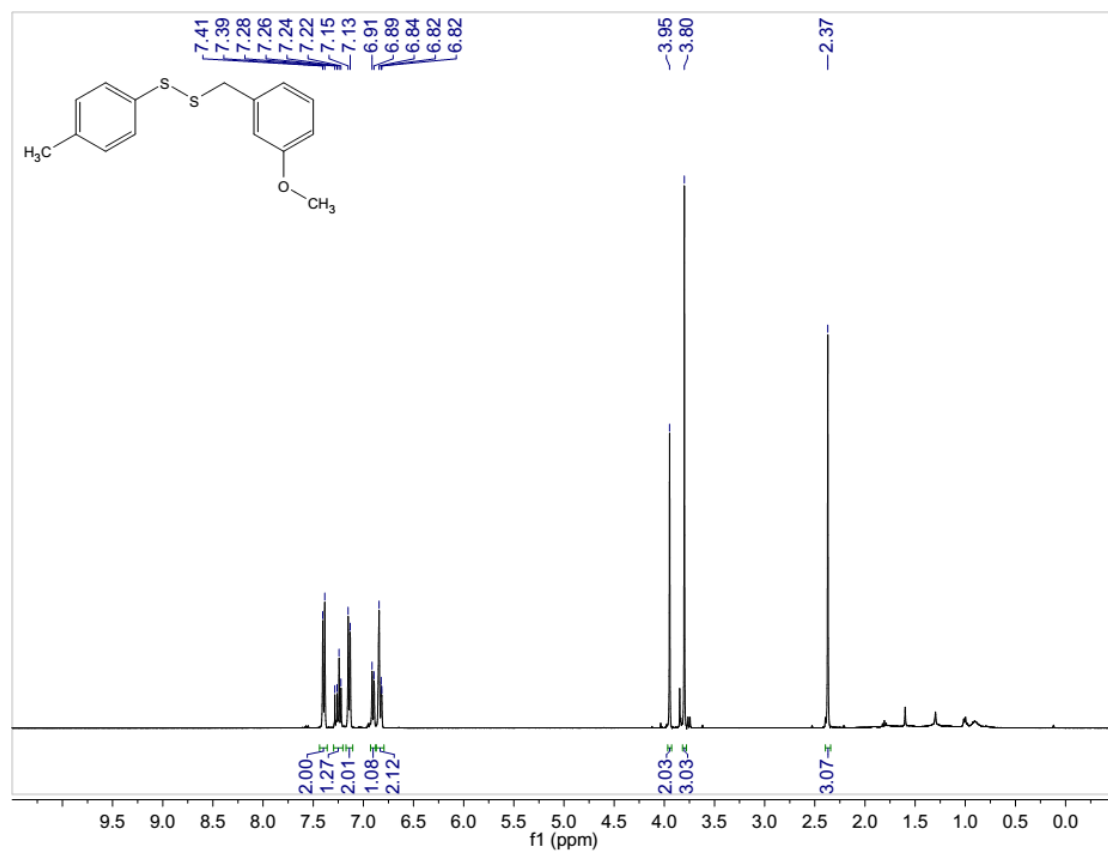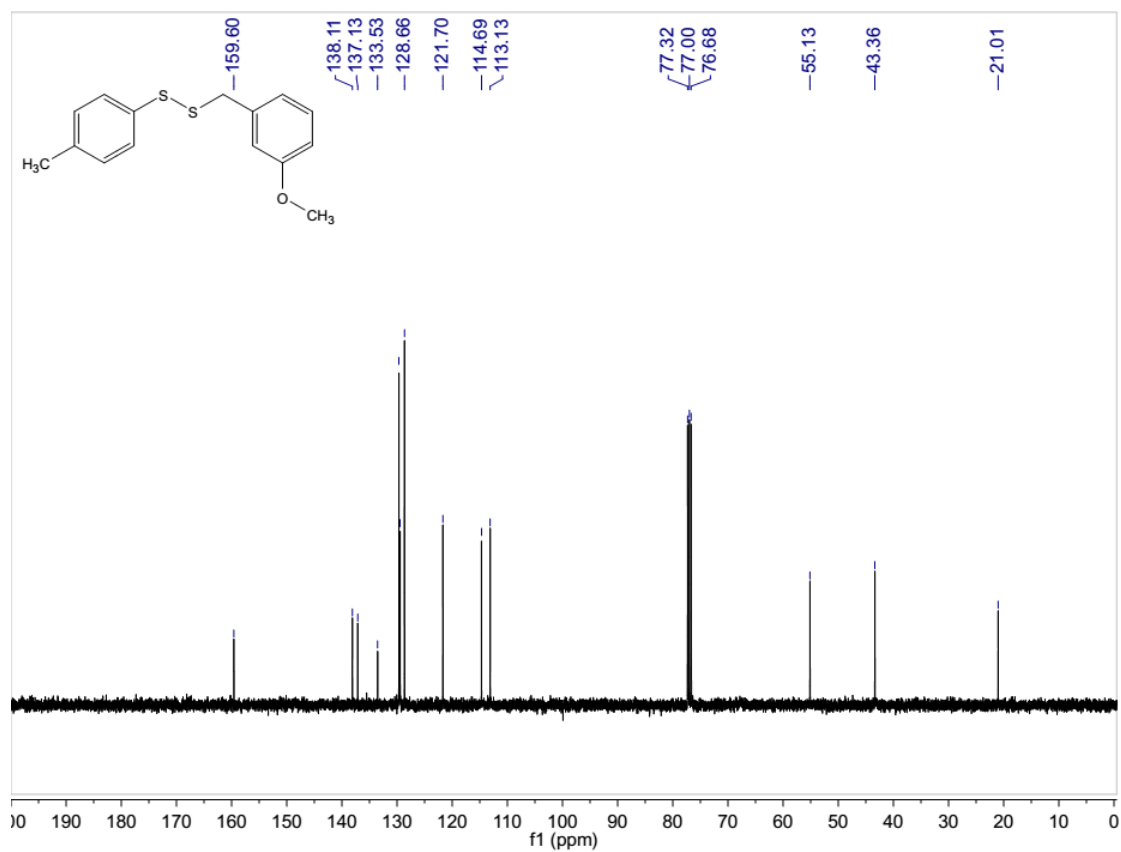

Compound **2f**:

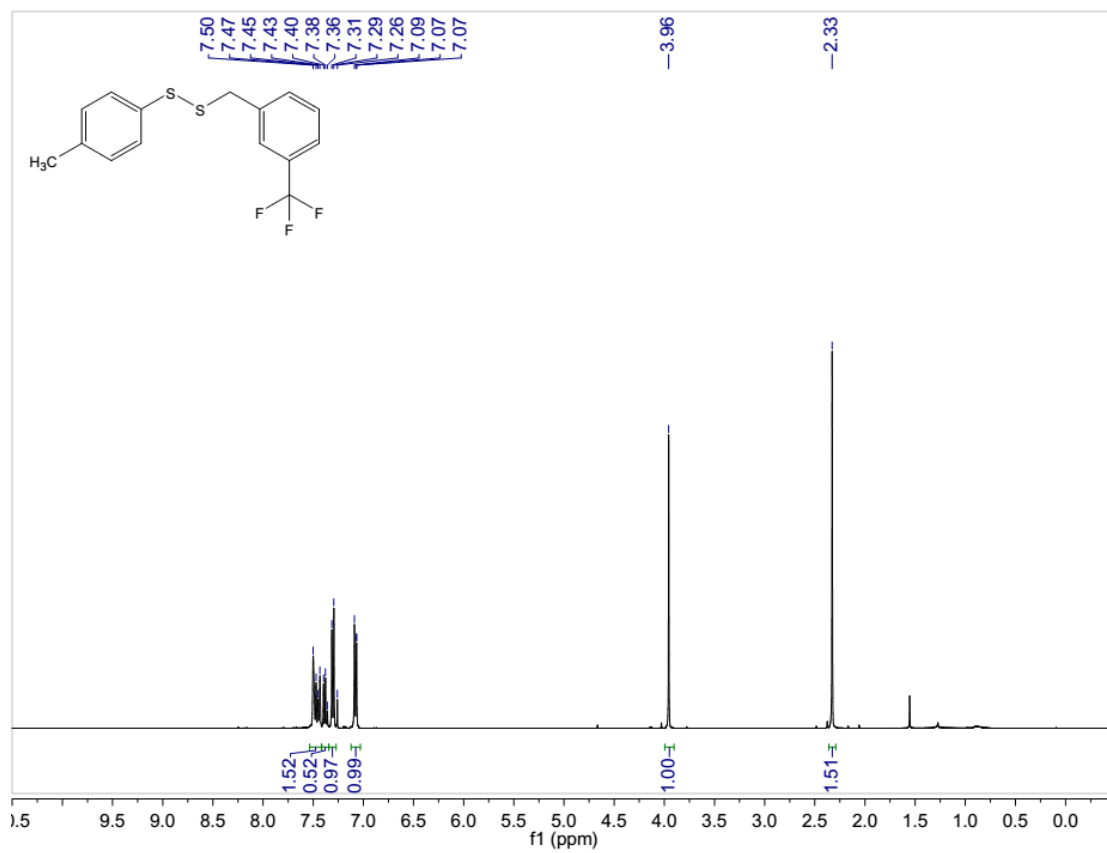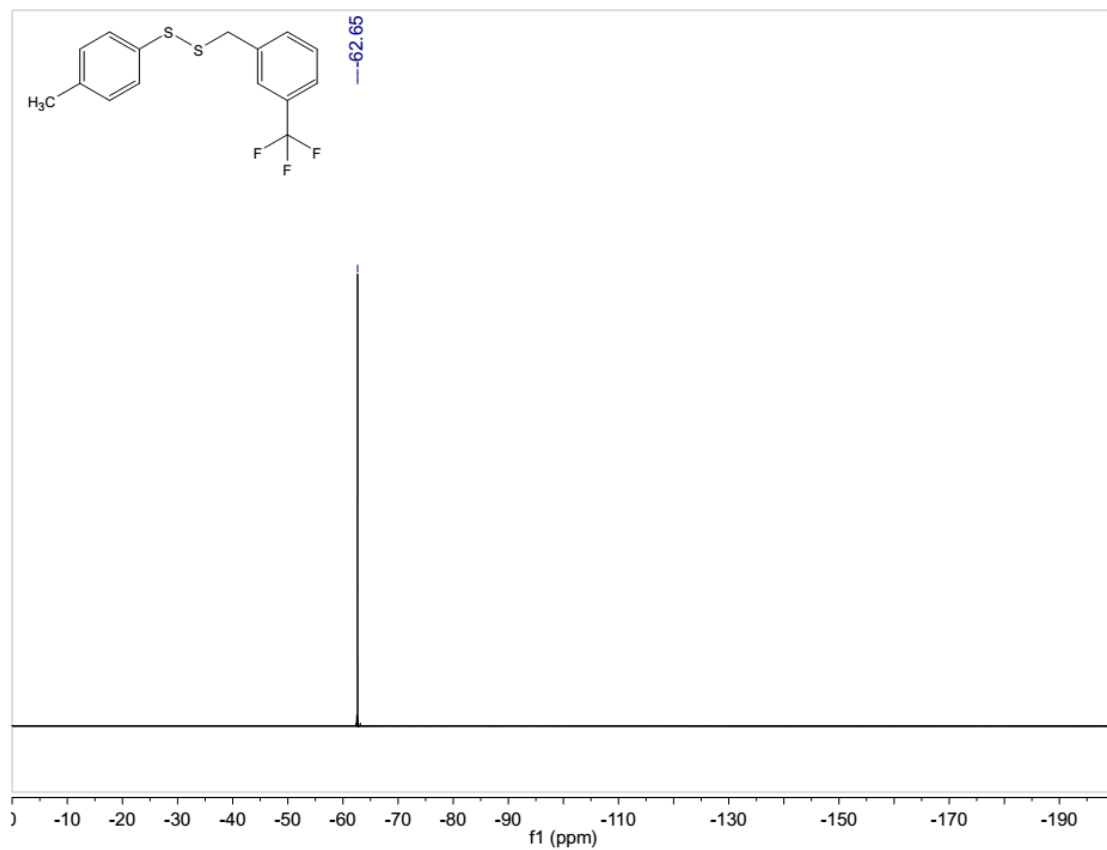

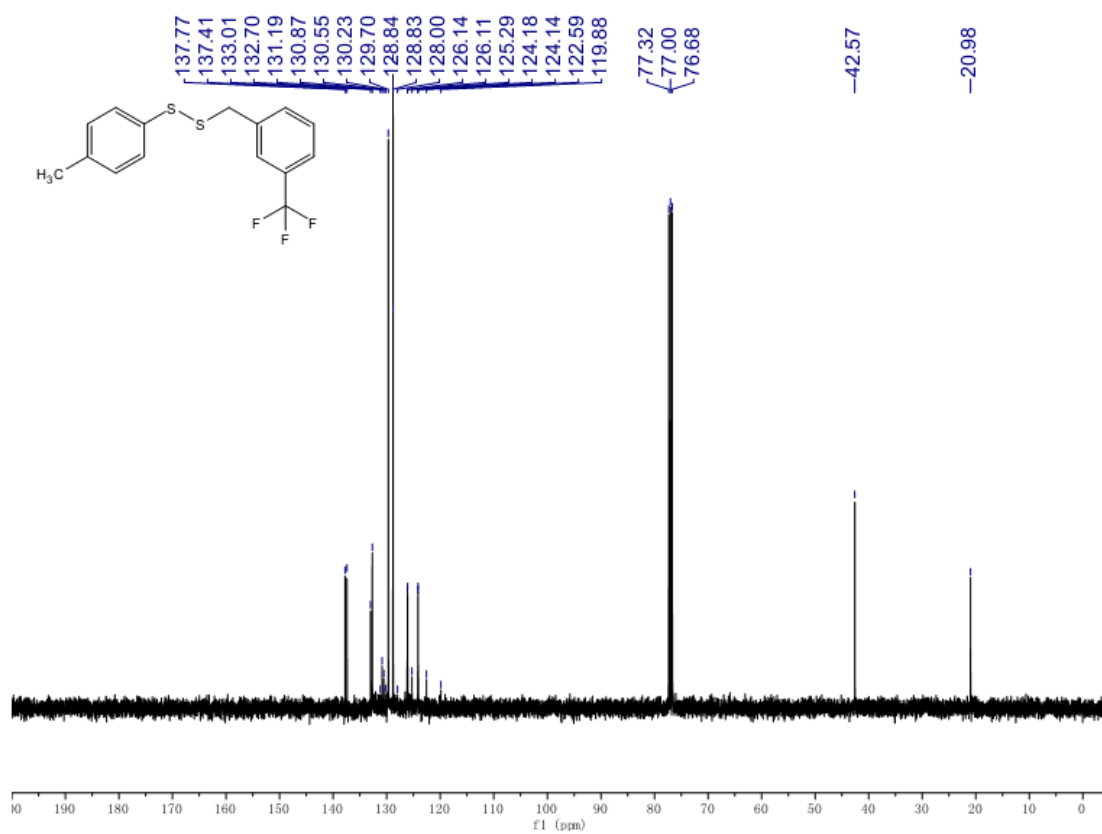

Compound **2g**:

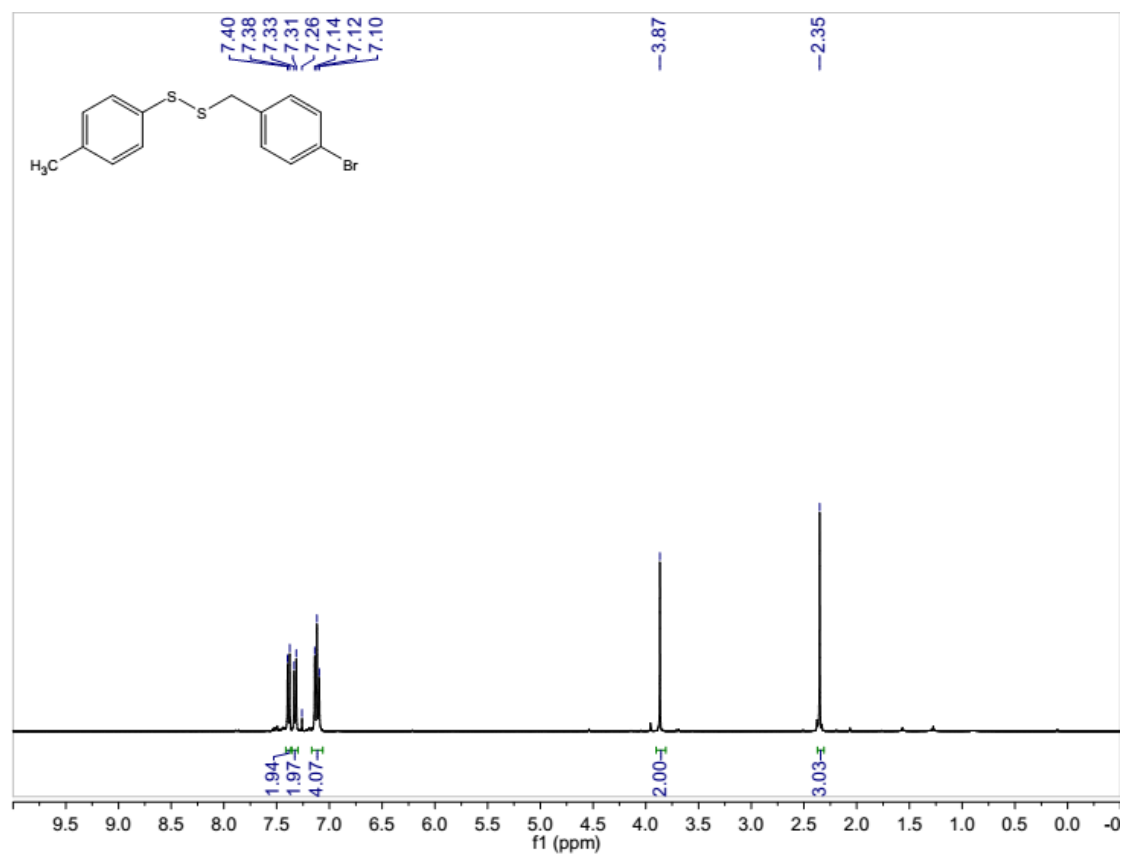

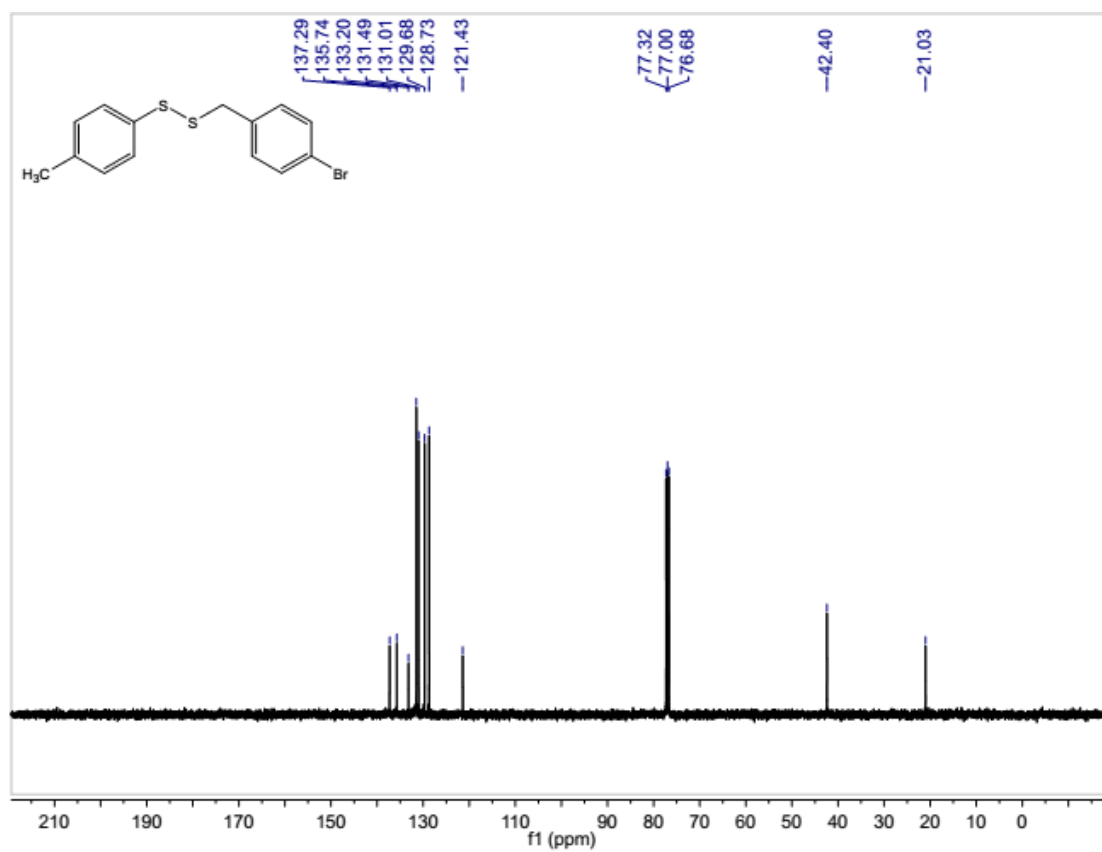

Compound **2h**:

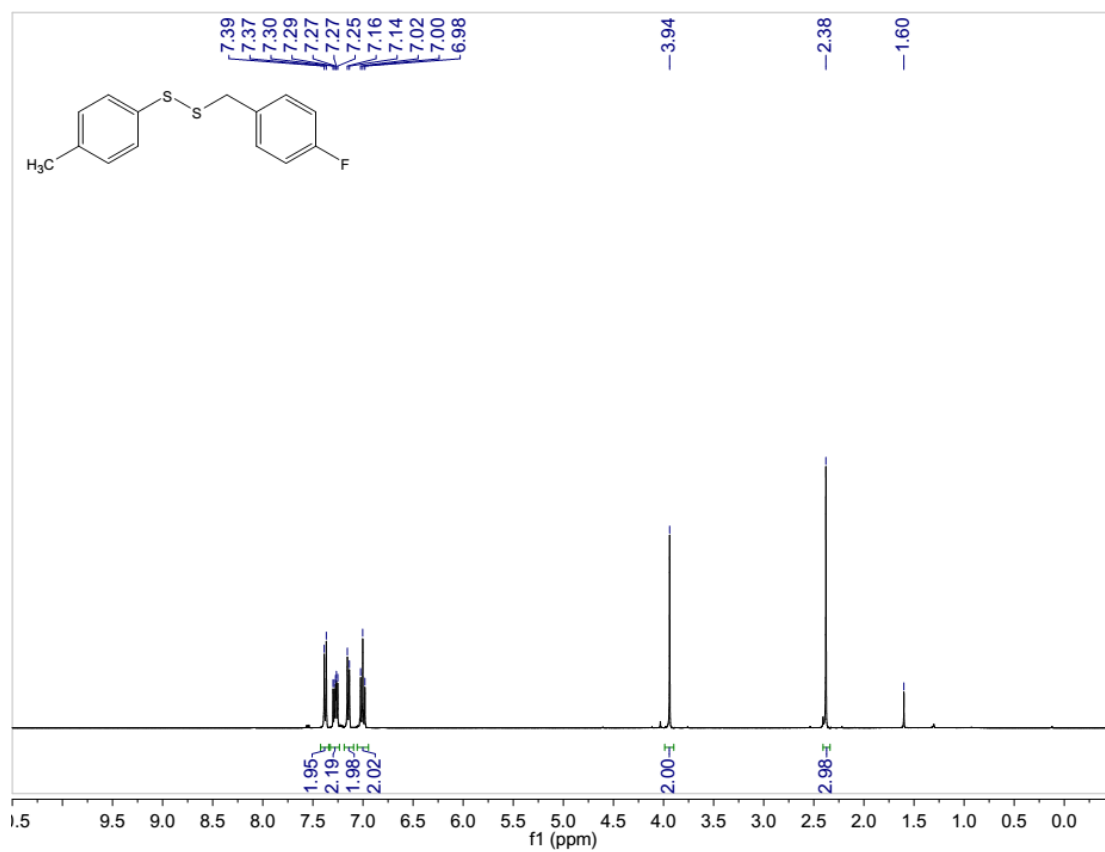

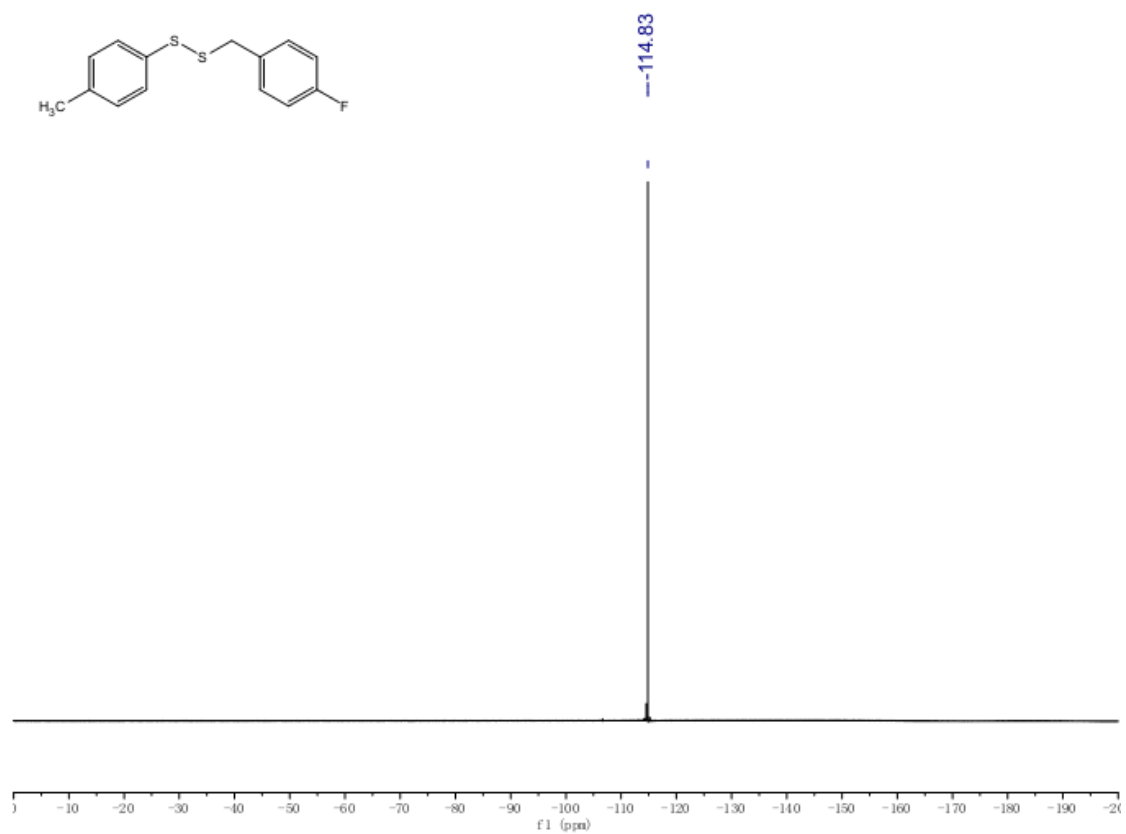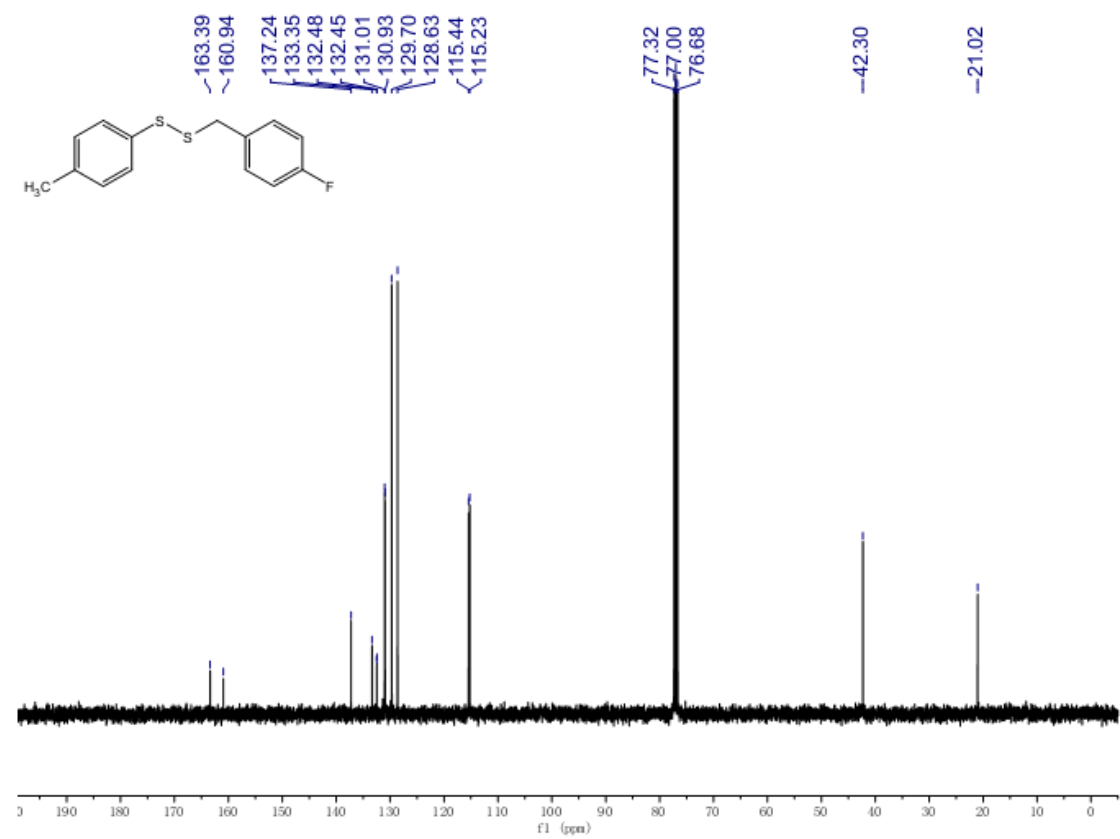

Compound 2i:

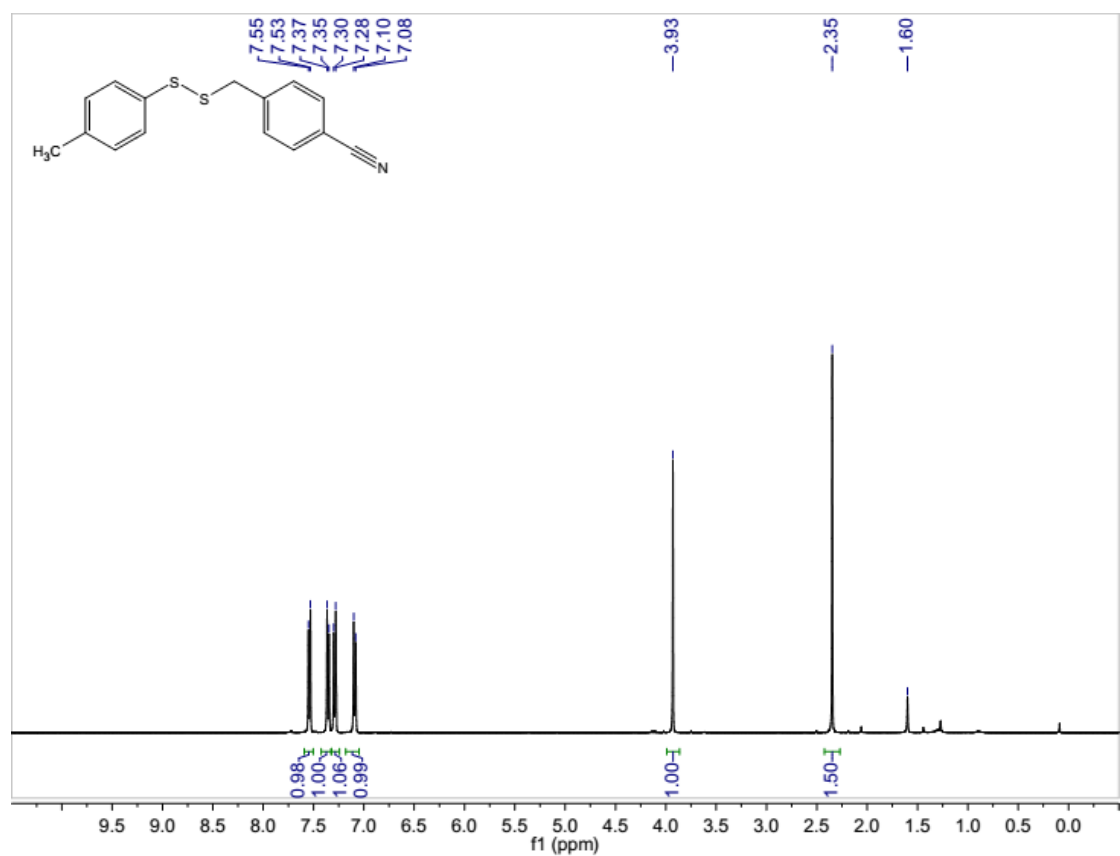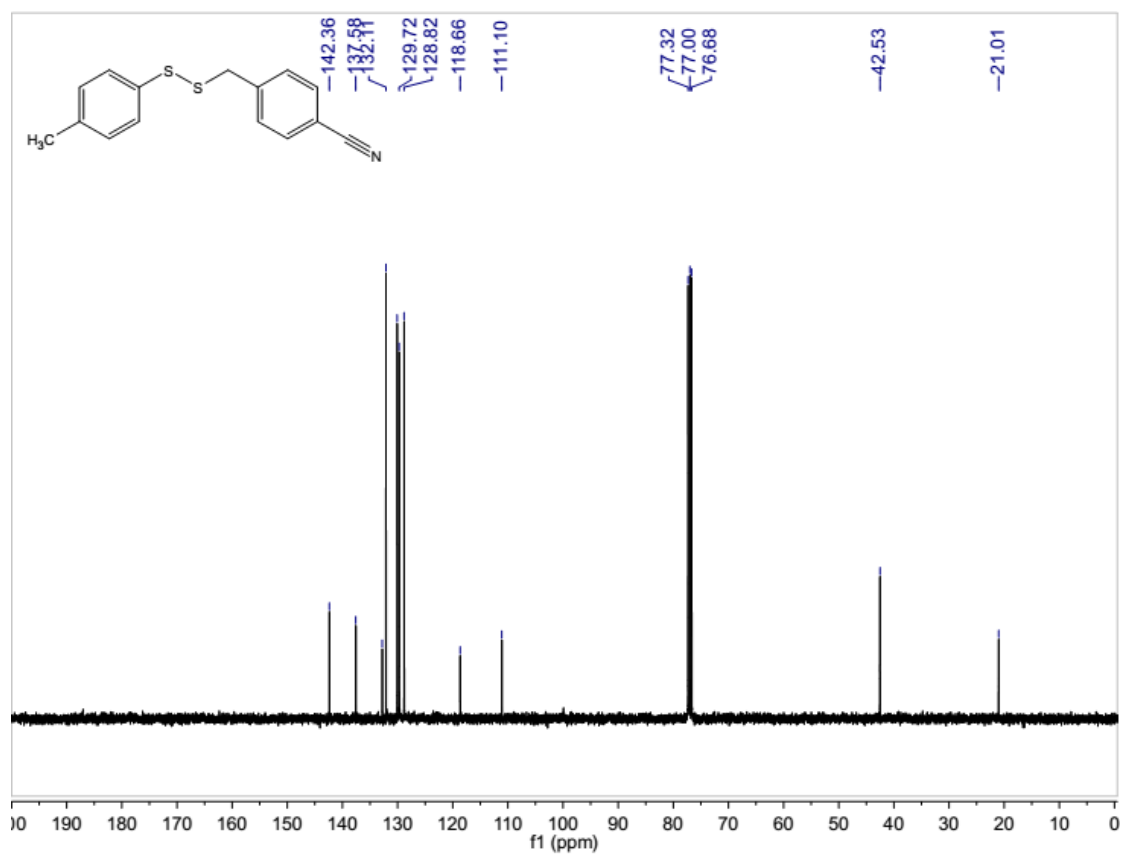

Compound 2j:

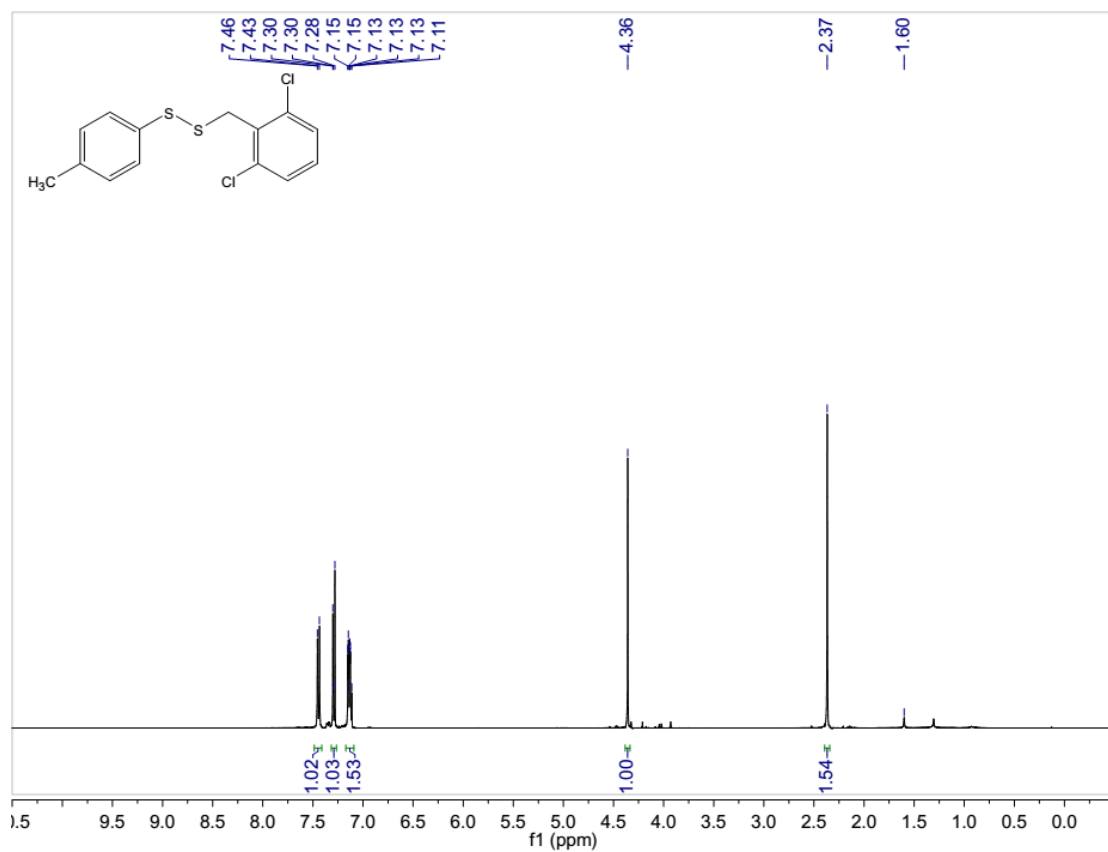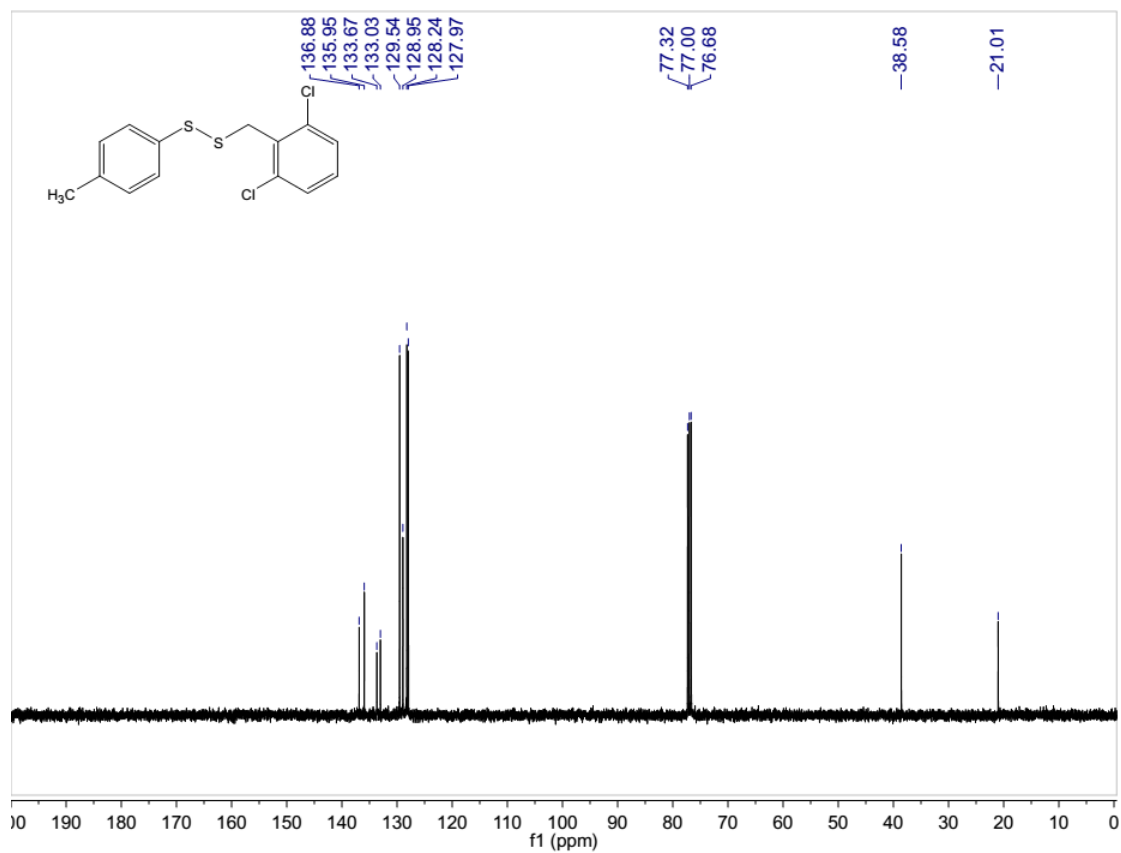

Compound **2k**:

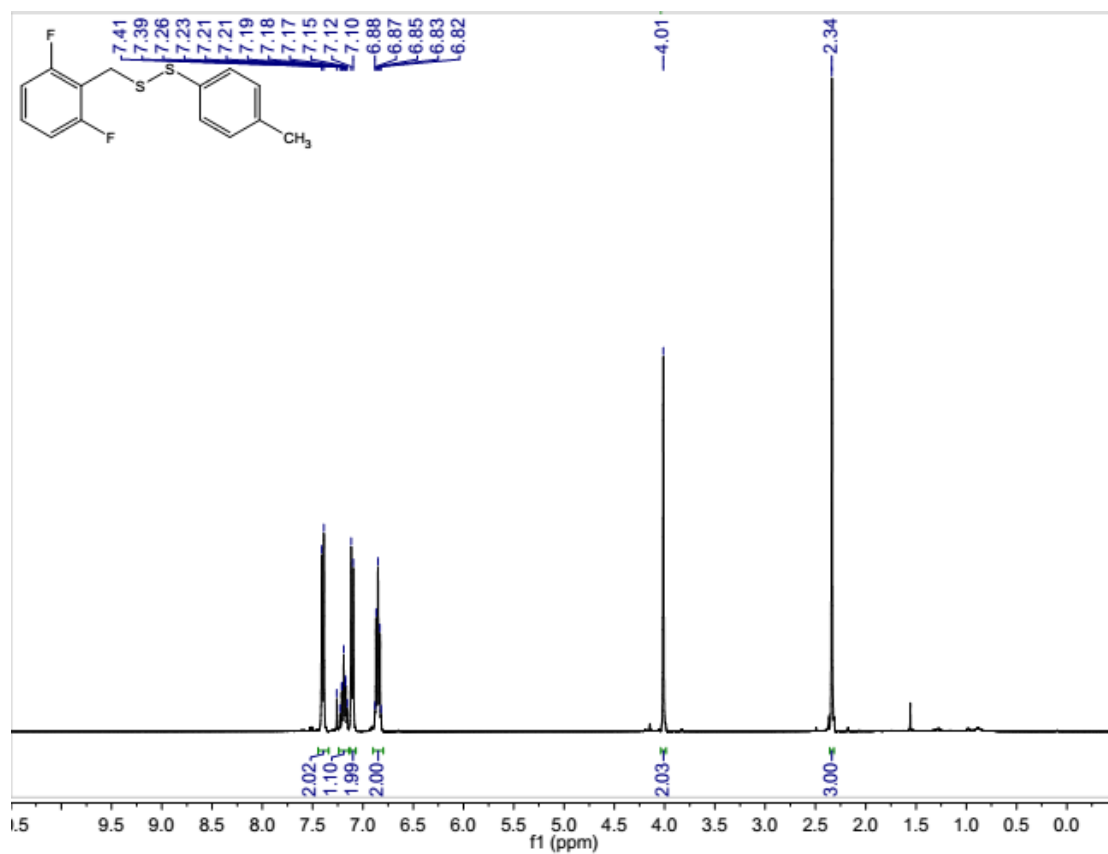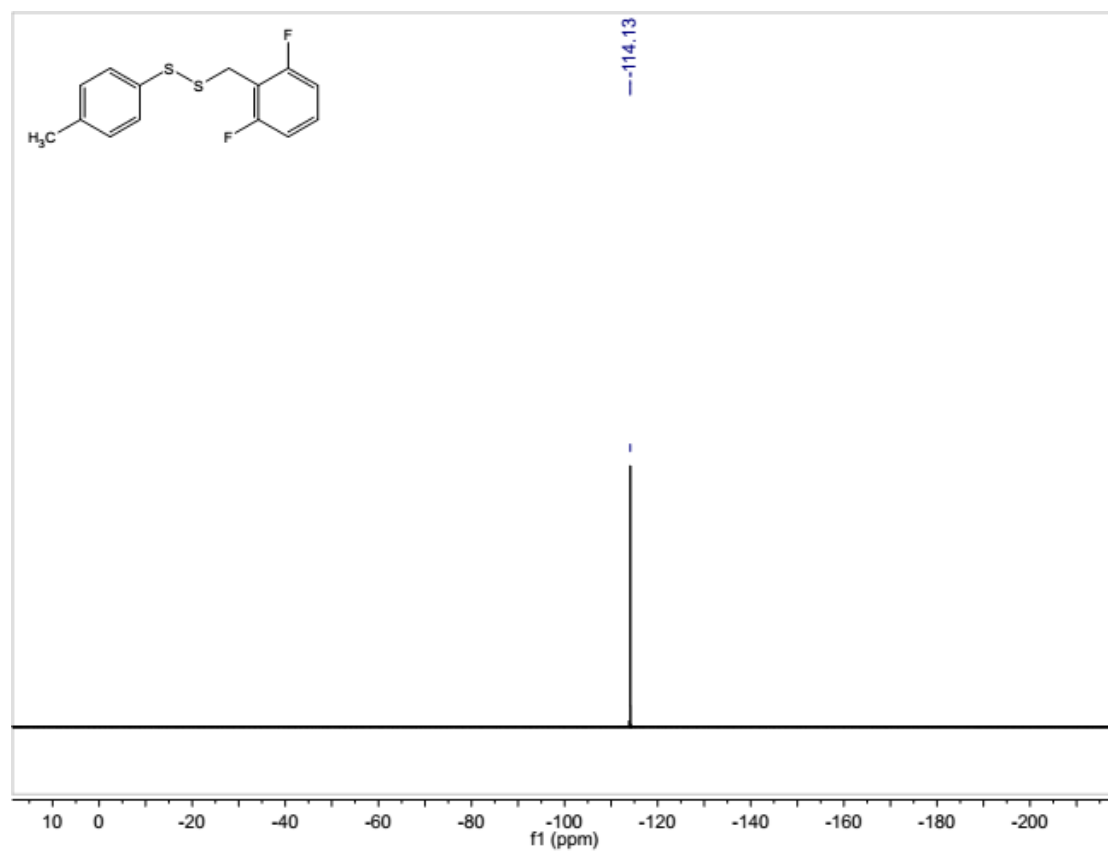



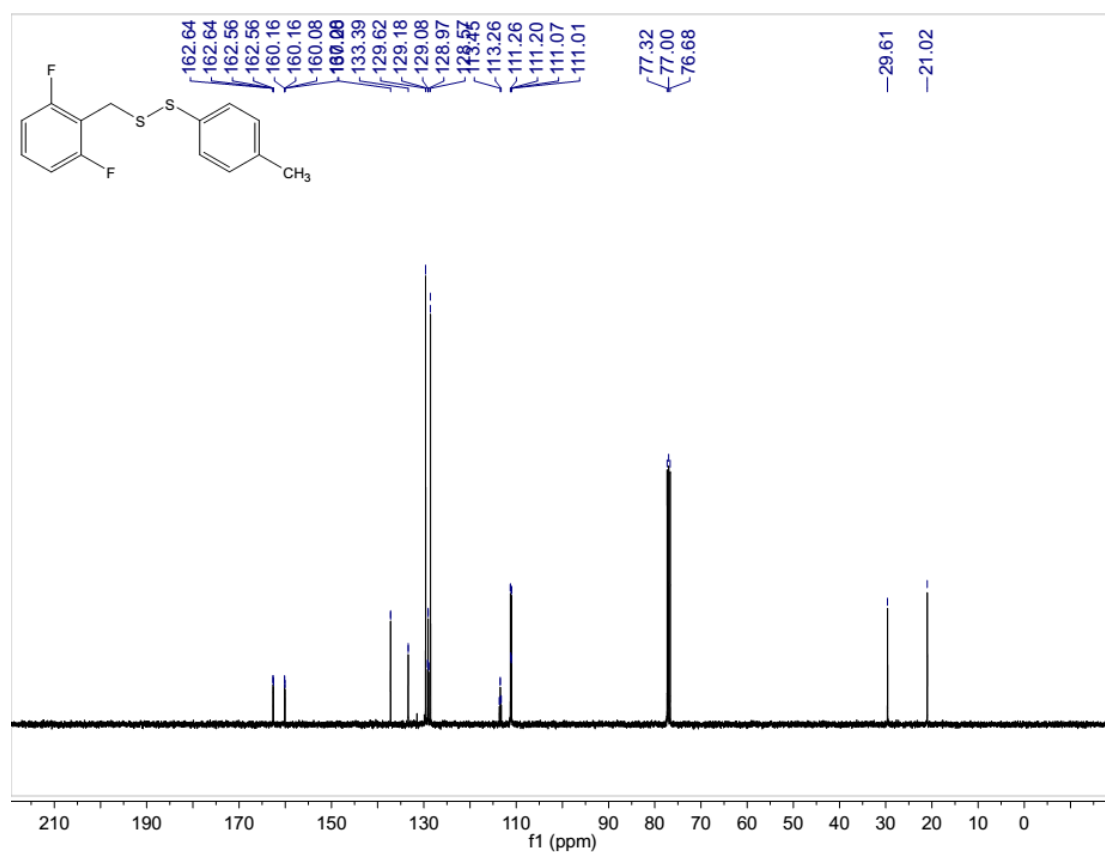

Compound 21:

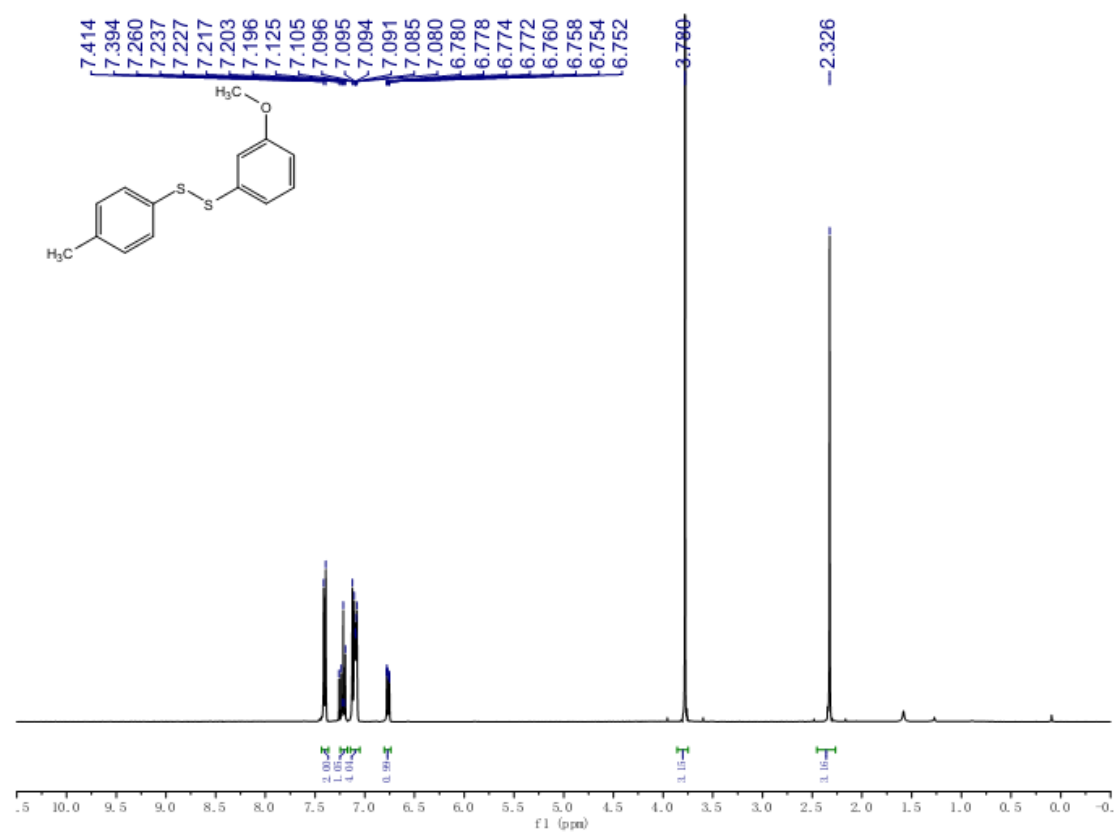

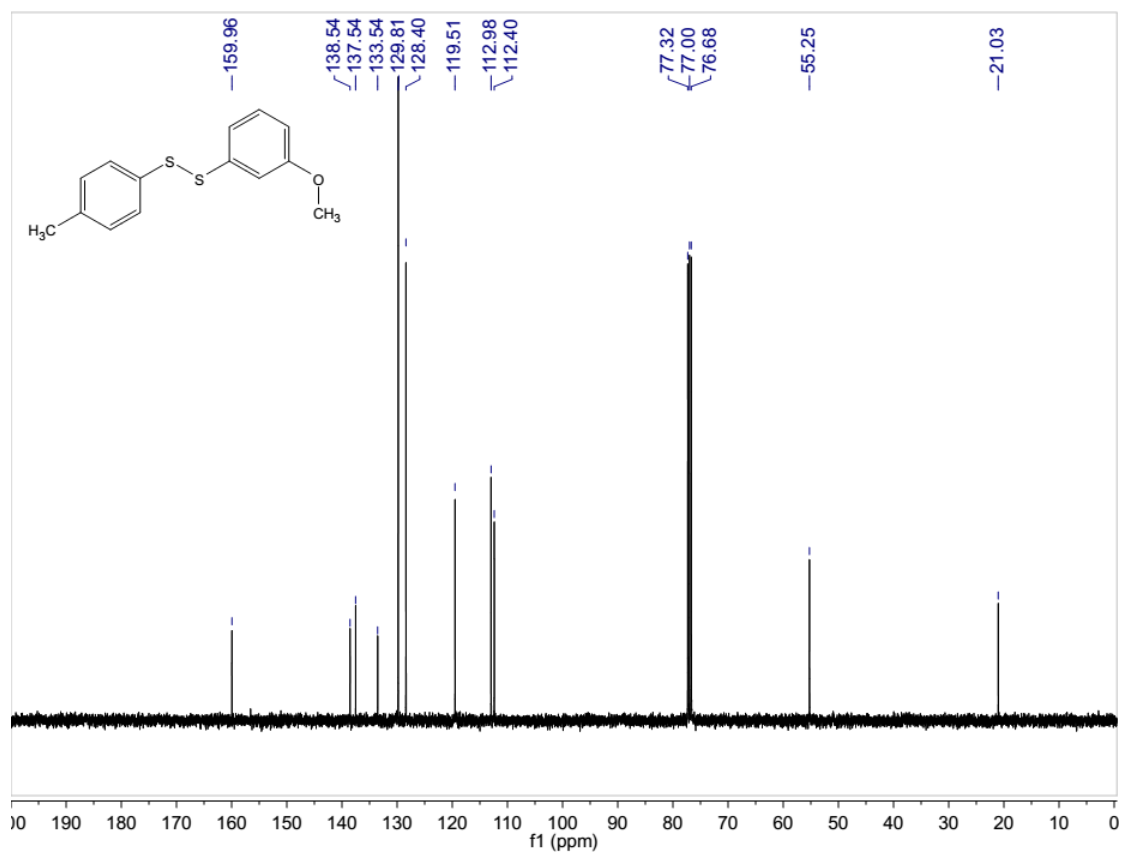

Compound **2m**:

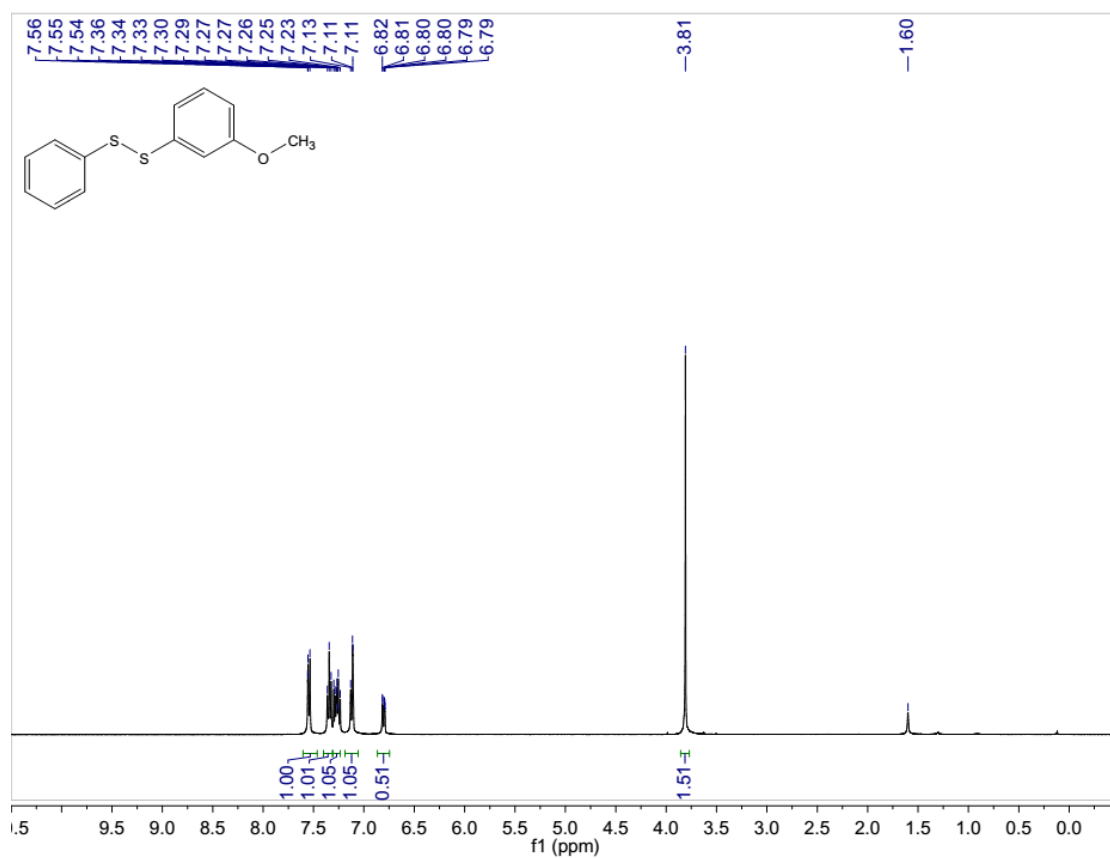

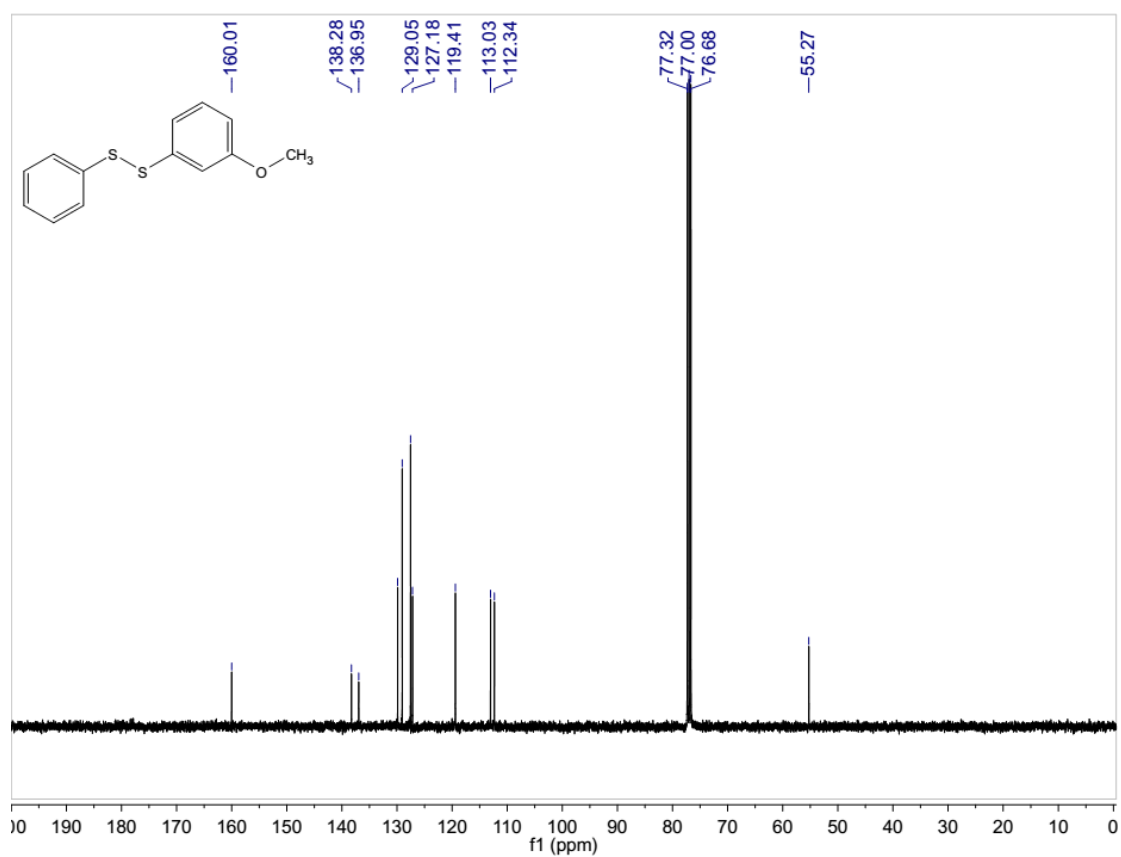

Compound **2n**:

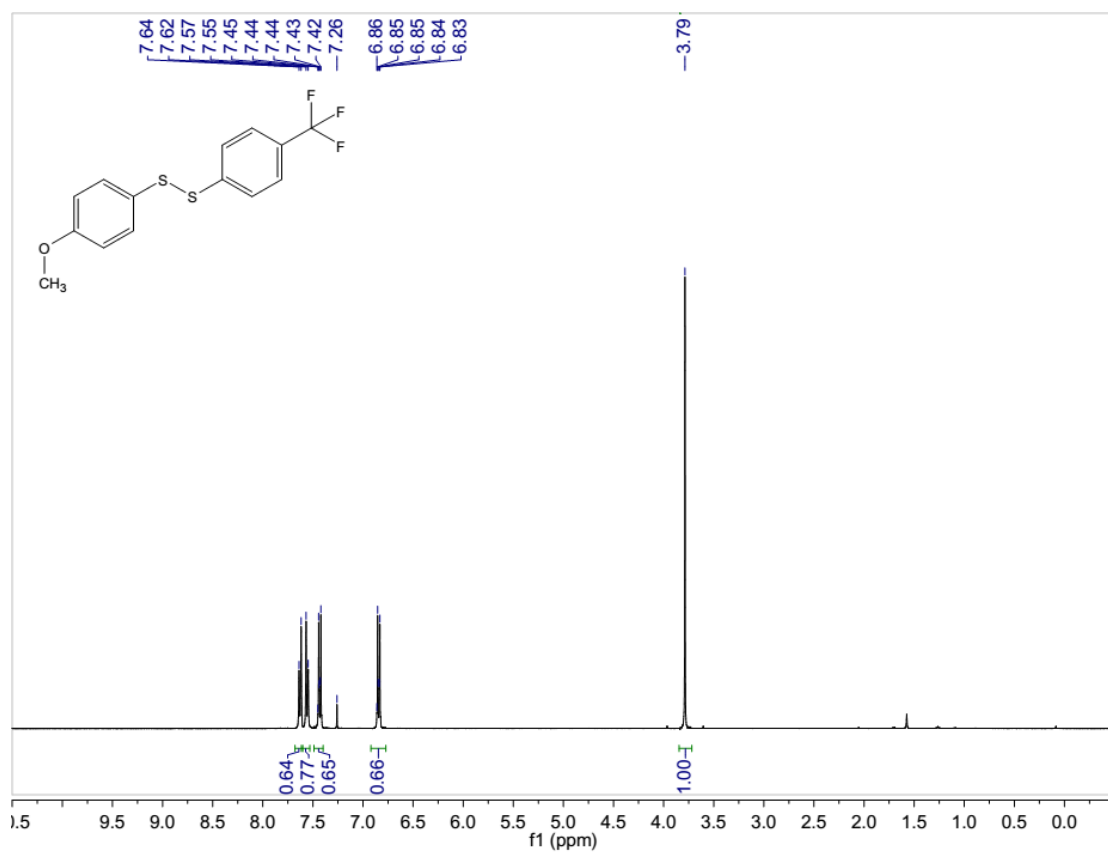

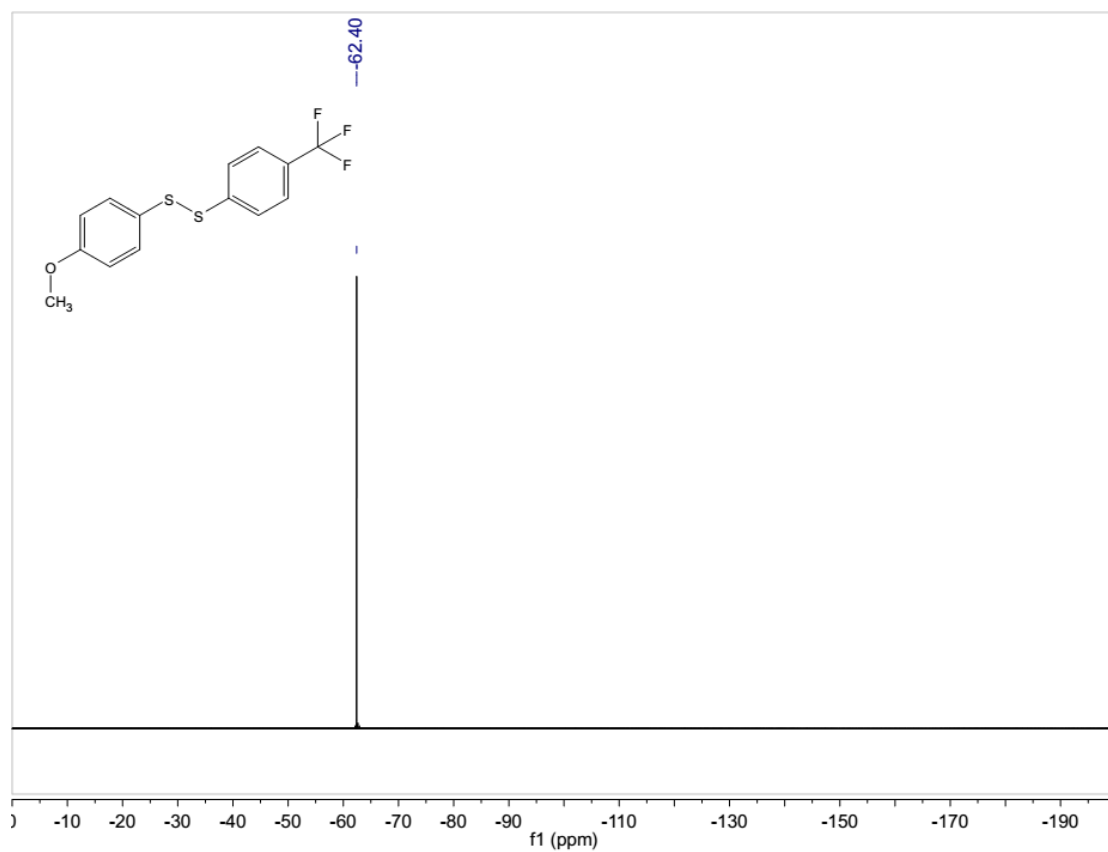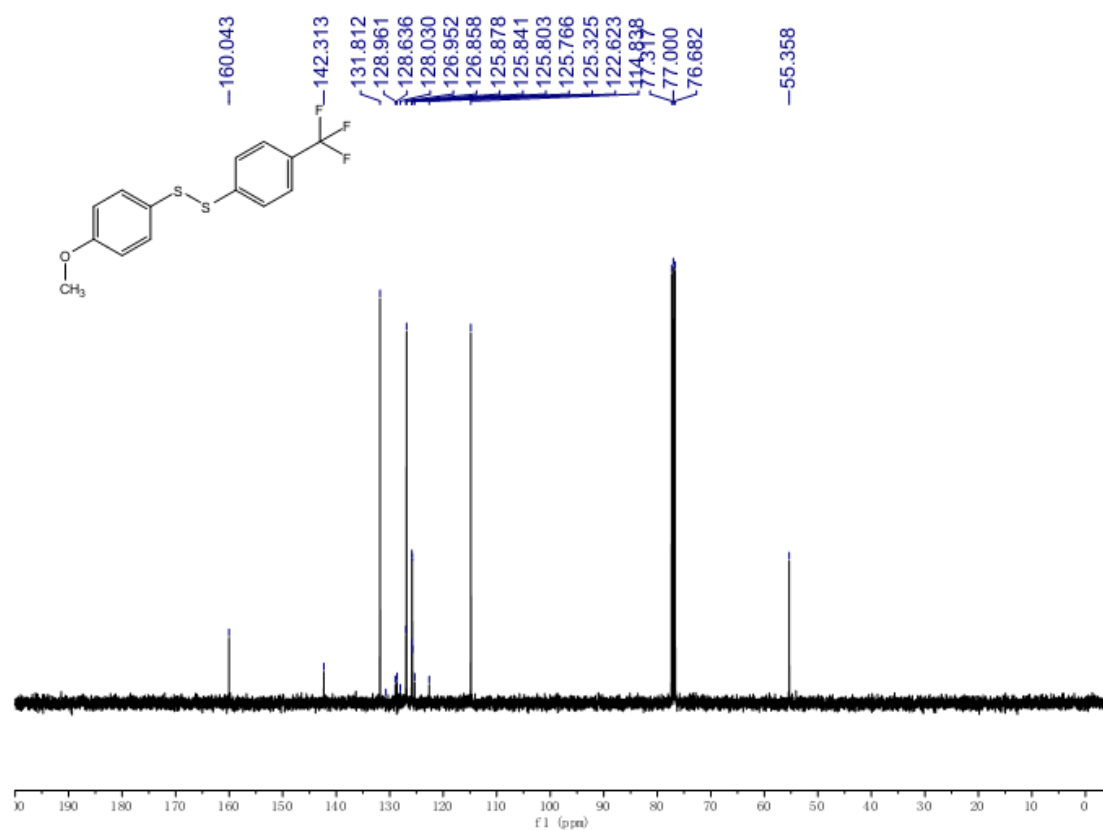

Compound 3a:

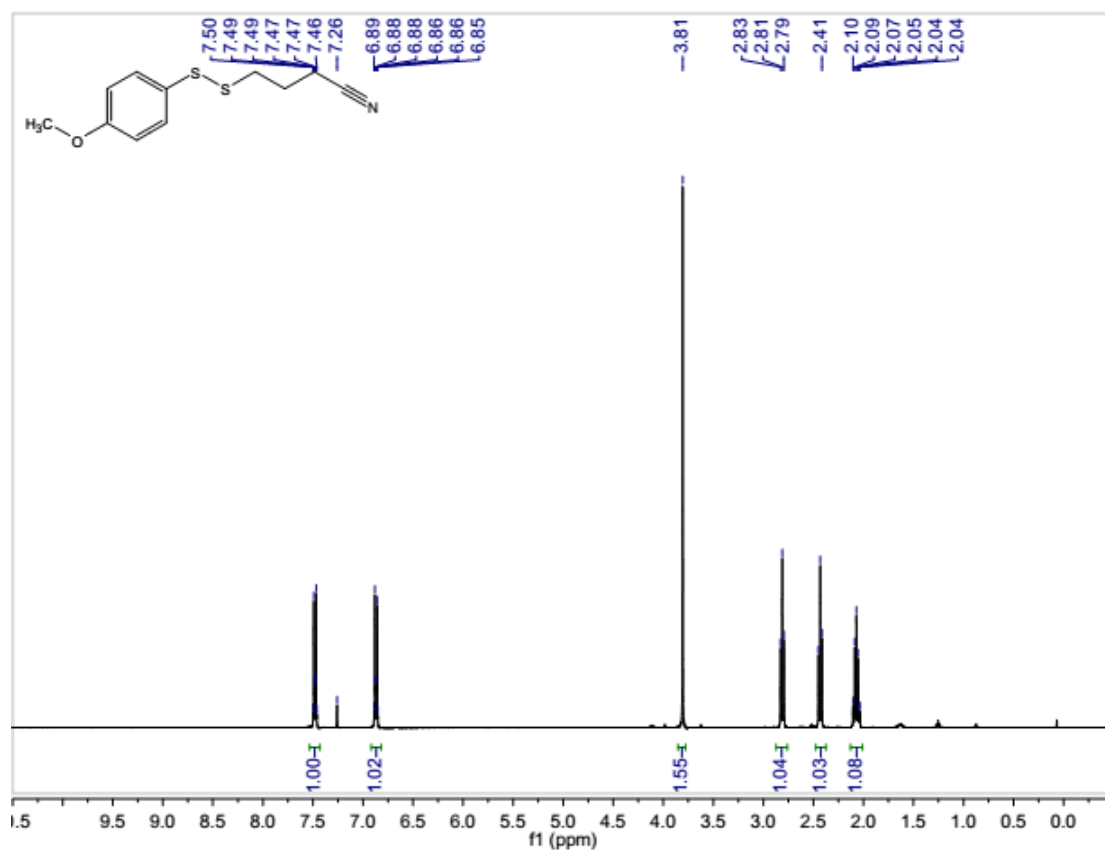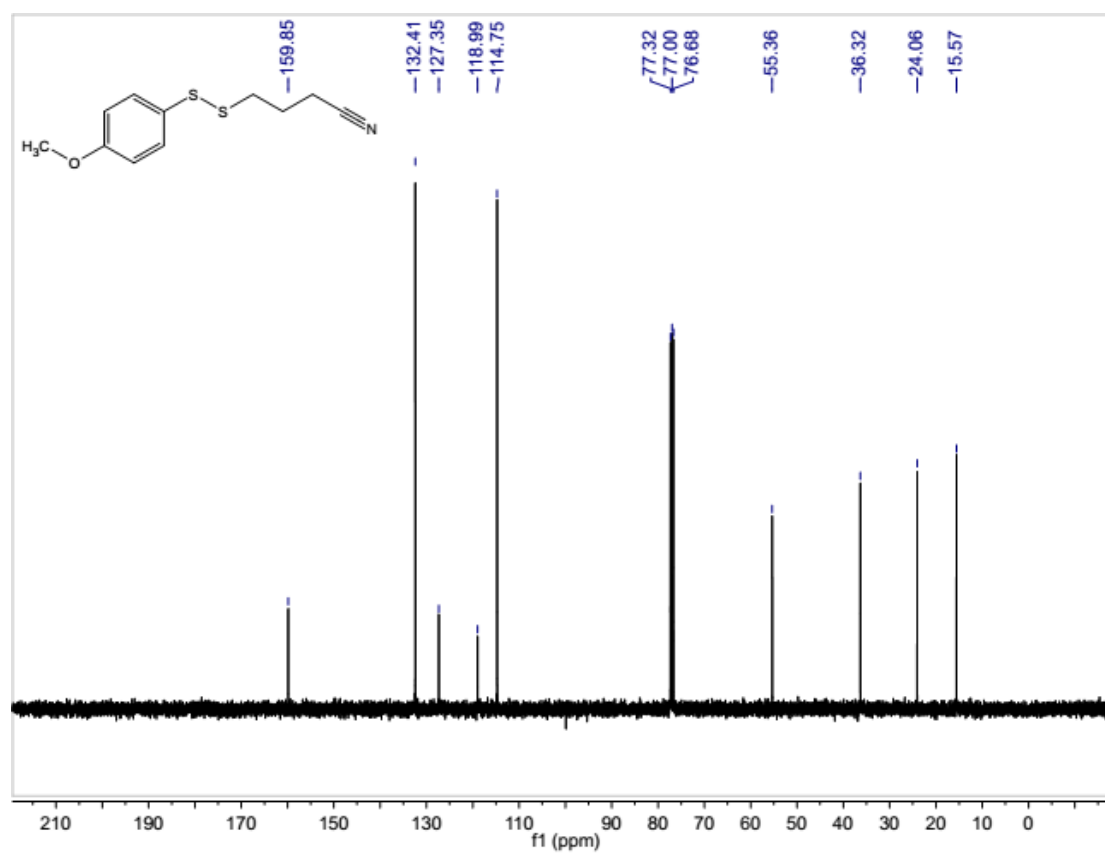

Compound **3b**:

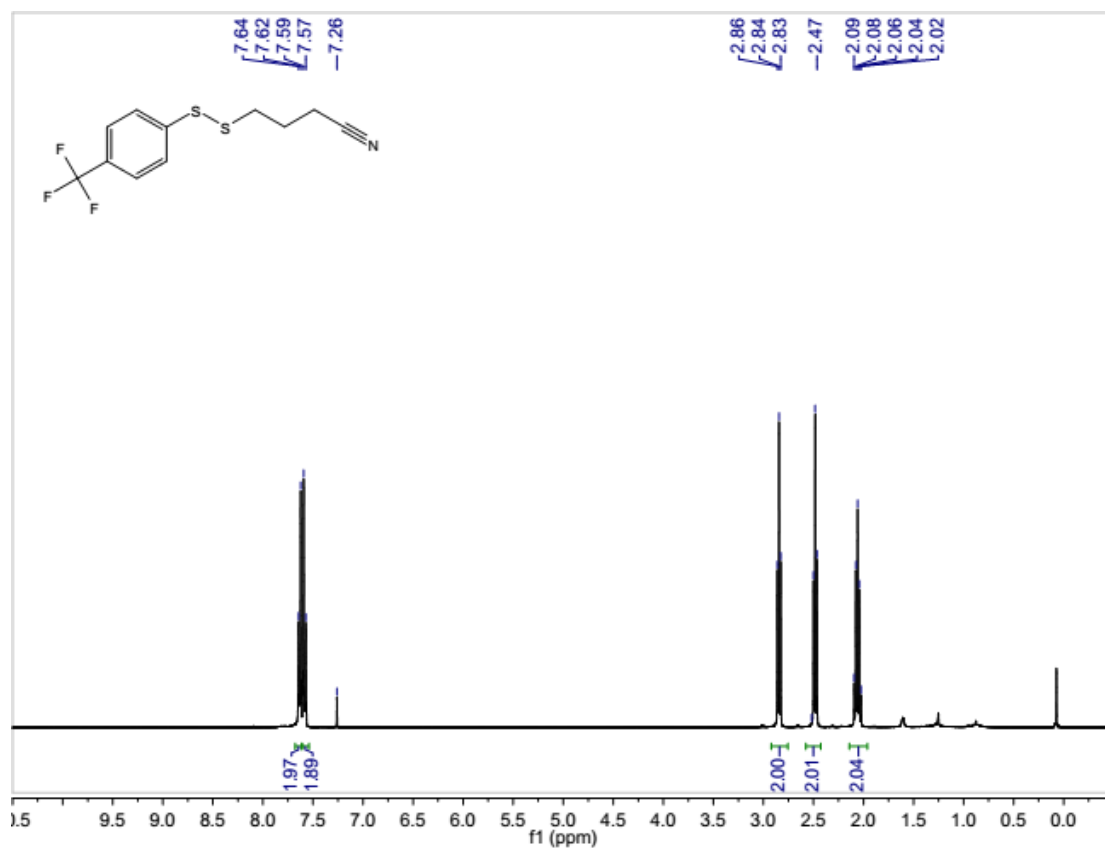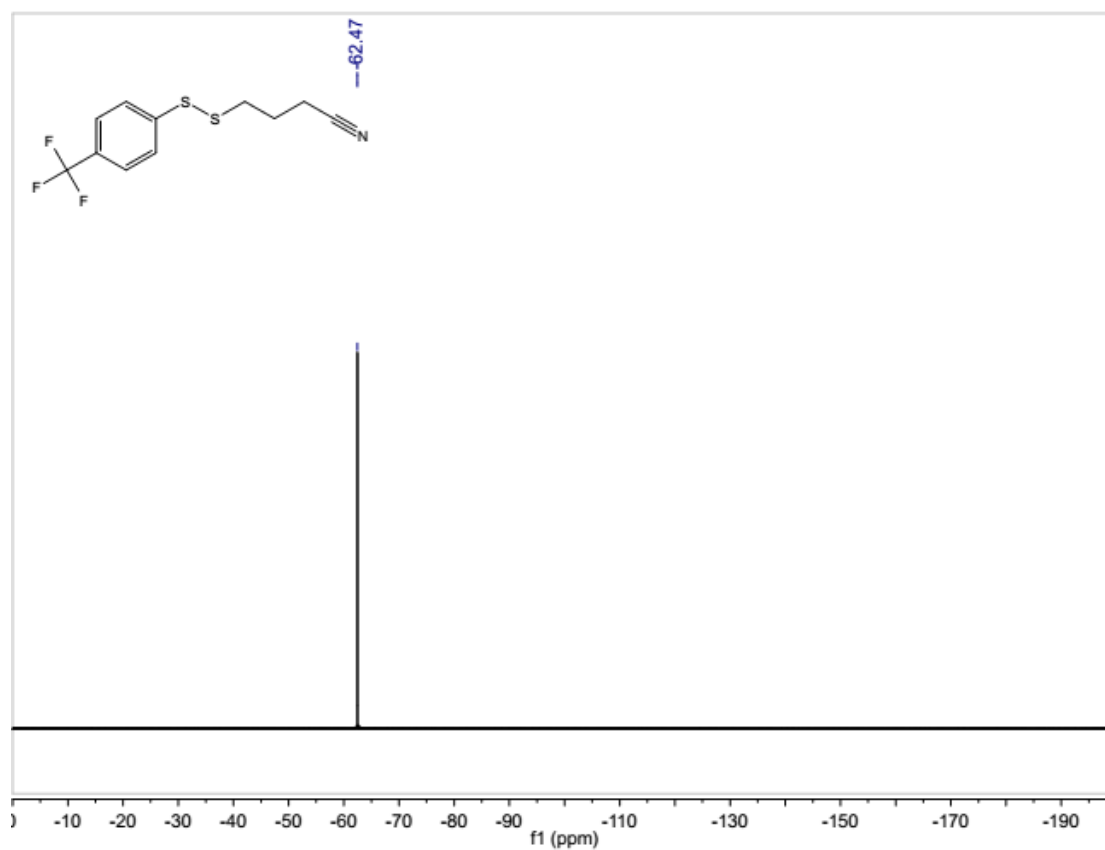

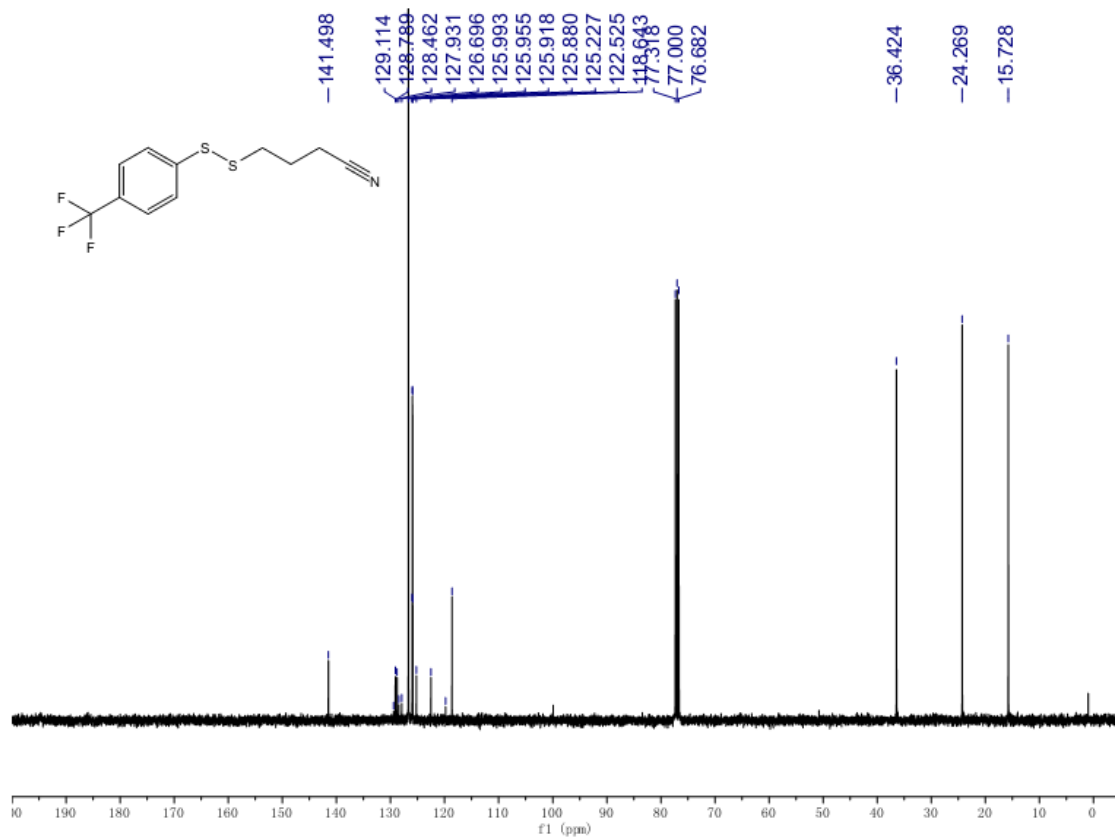

Compound 3c:

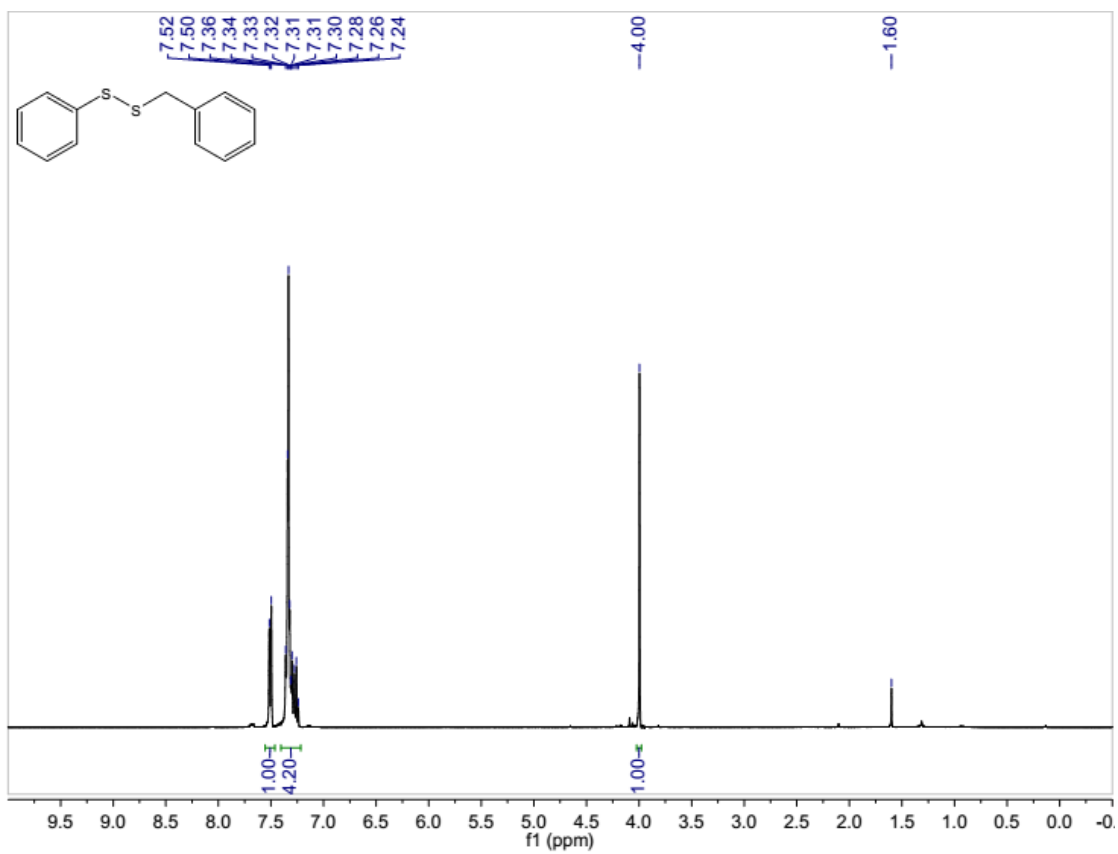

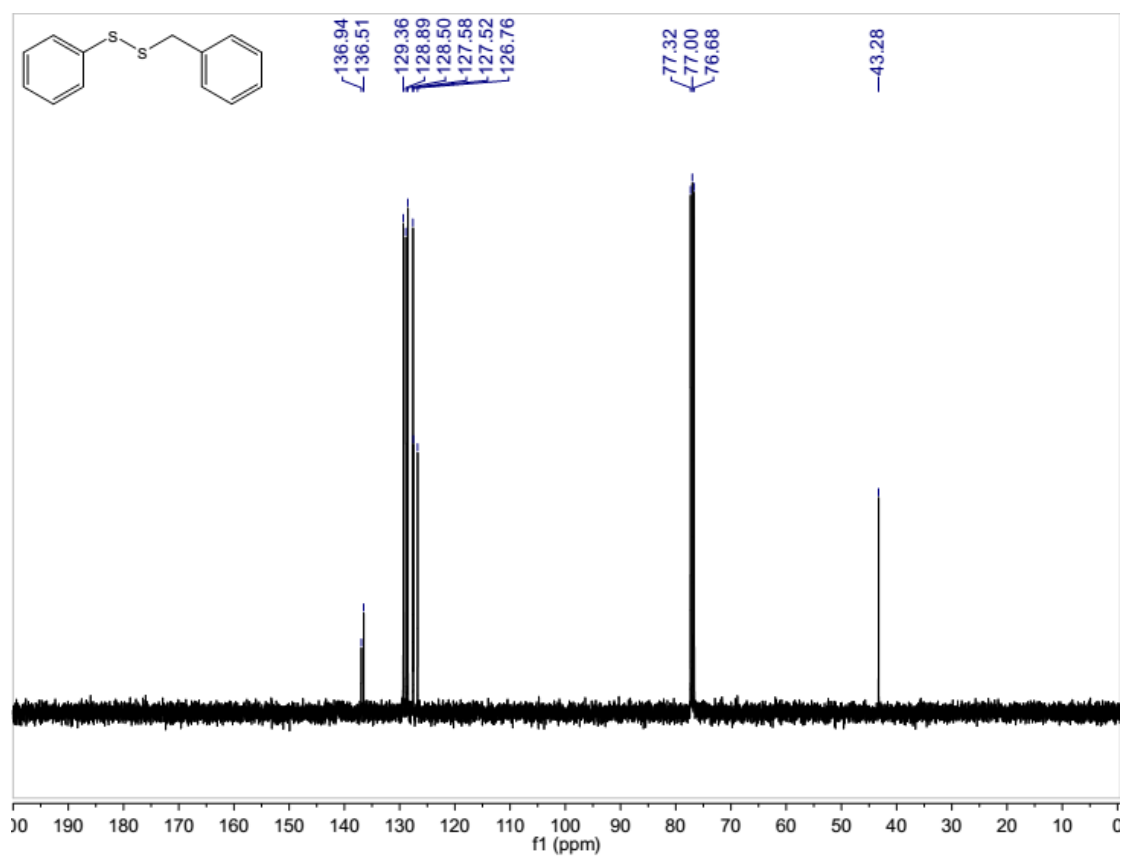

Compound **3d**:

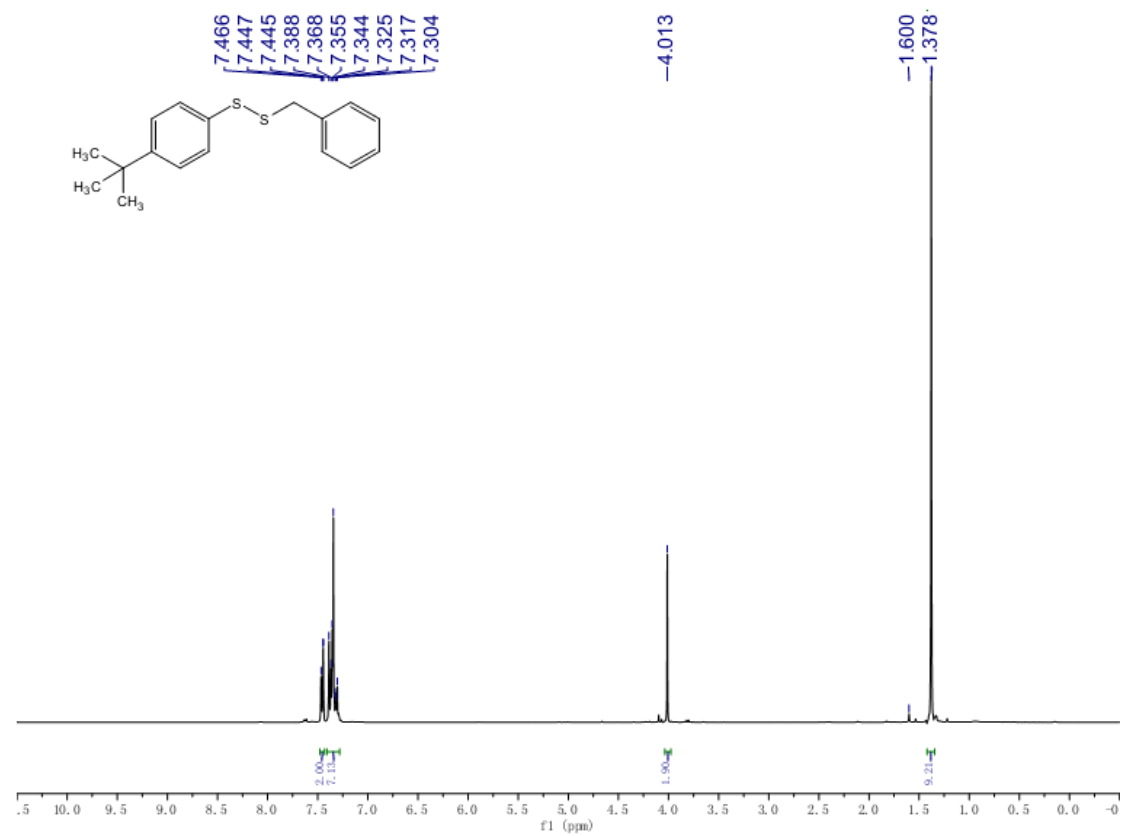



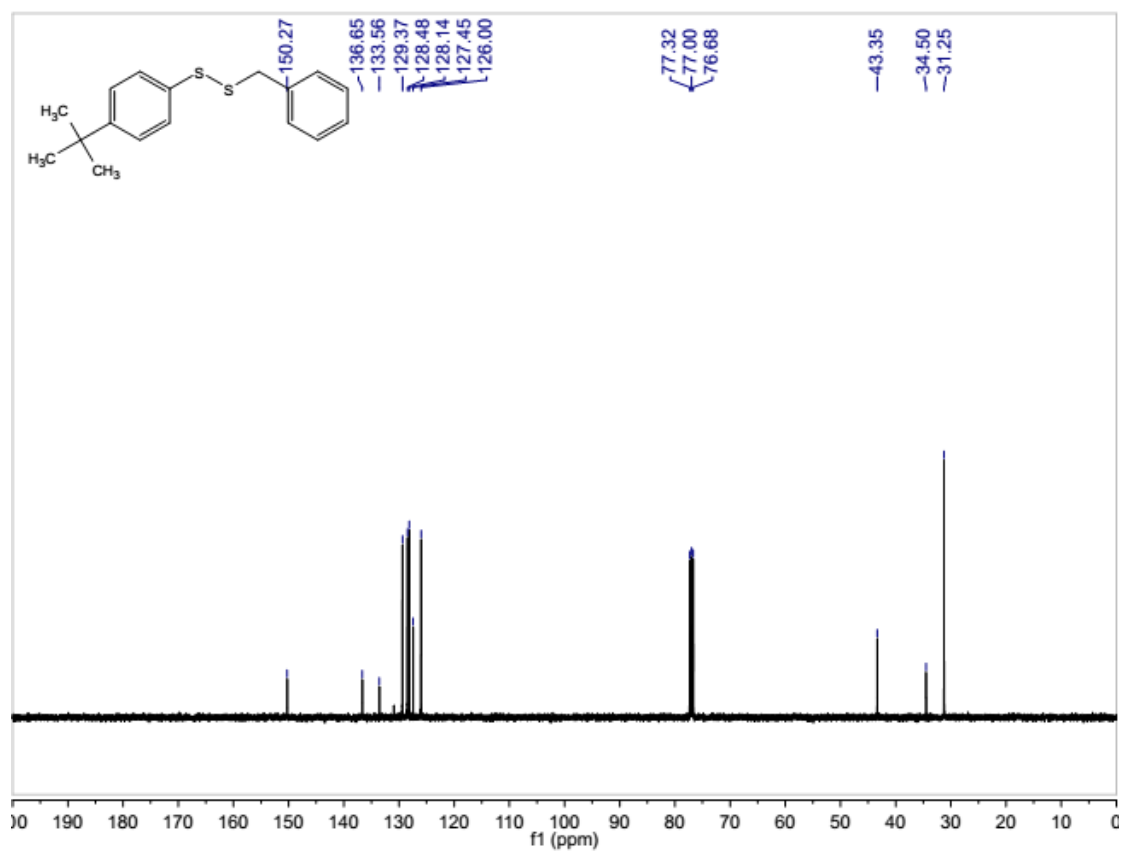

Compound 3e:

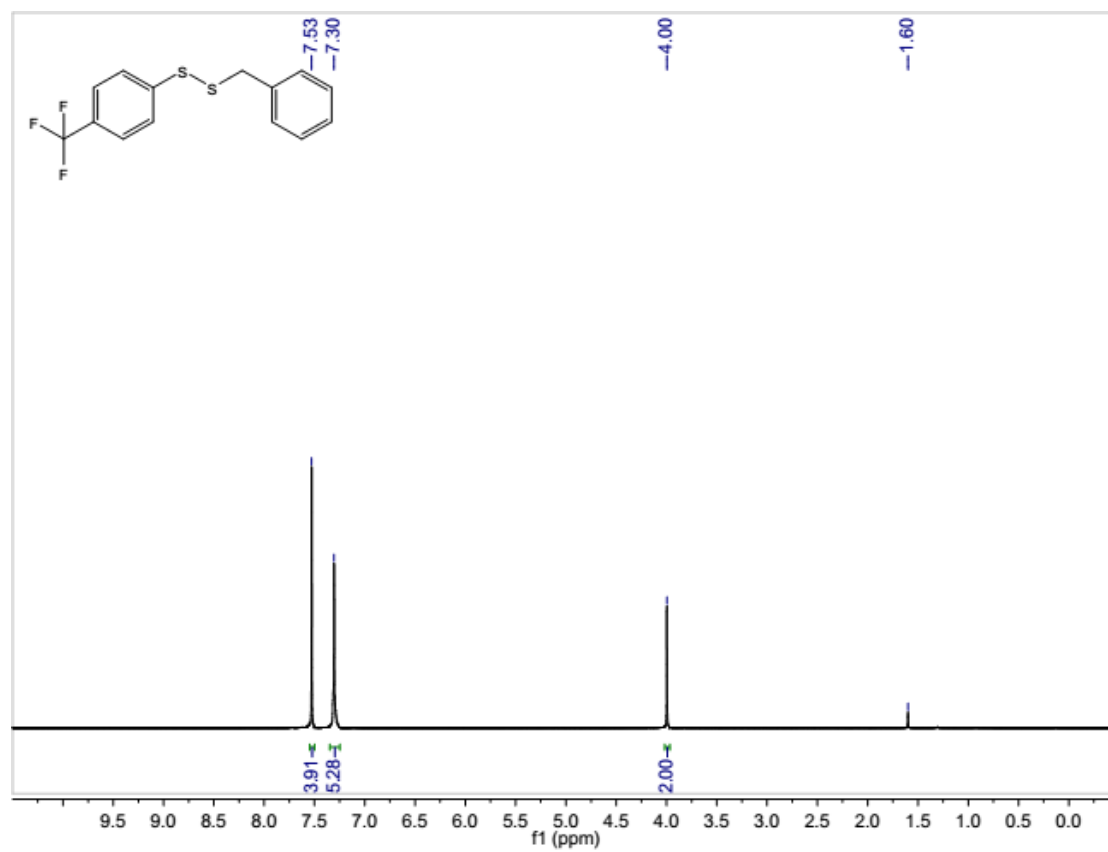

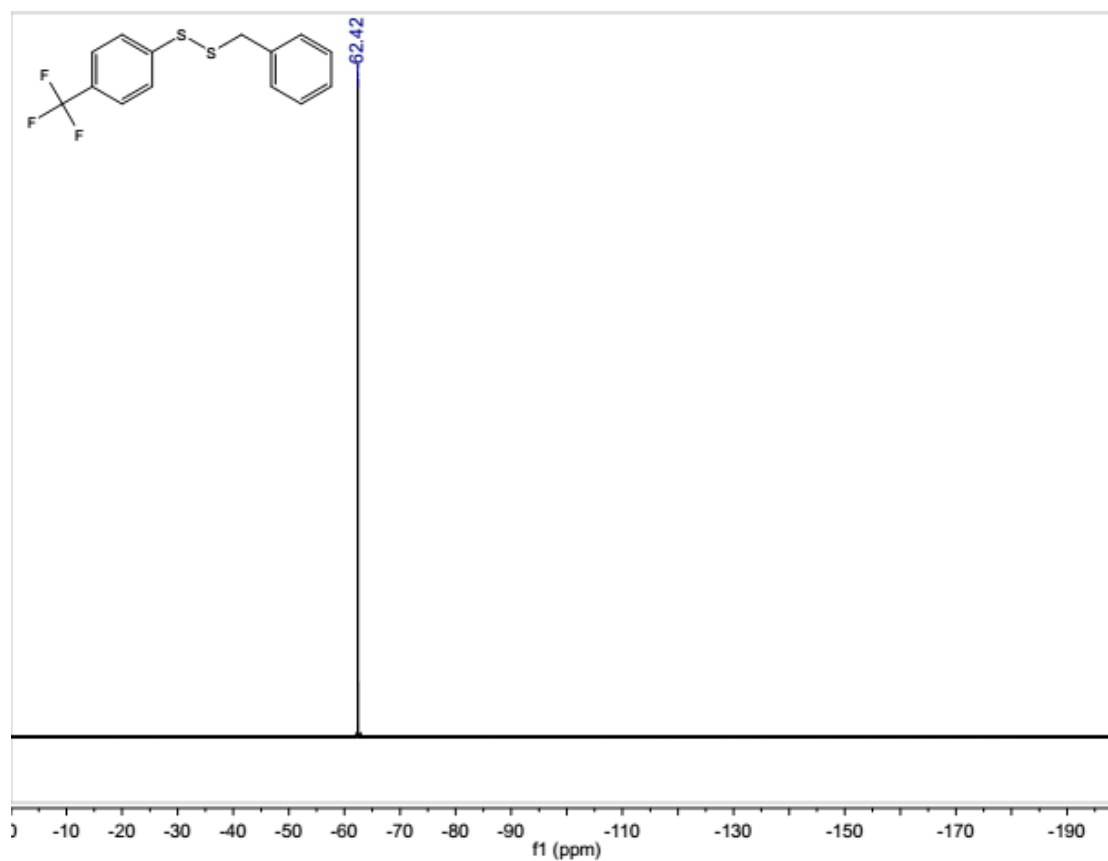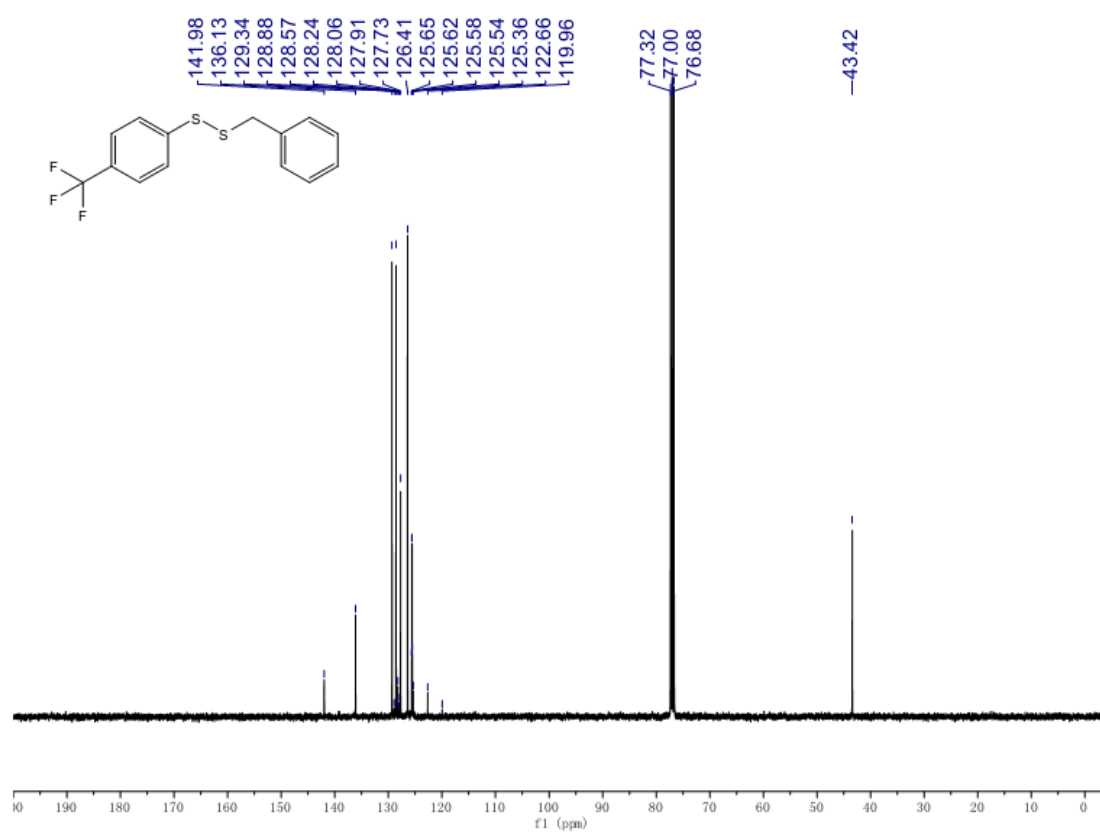

Compound 3f:

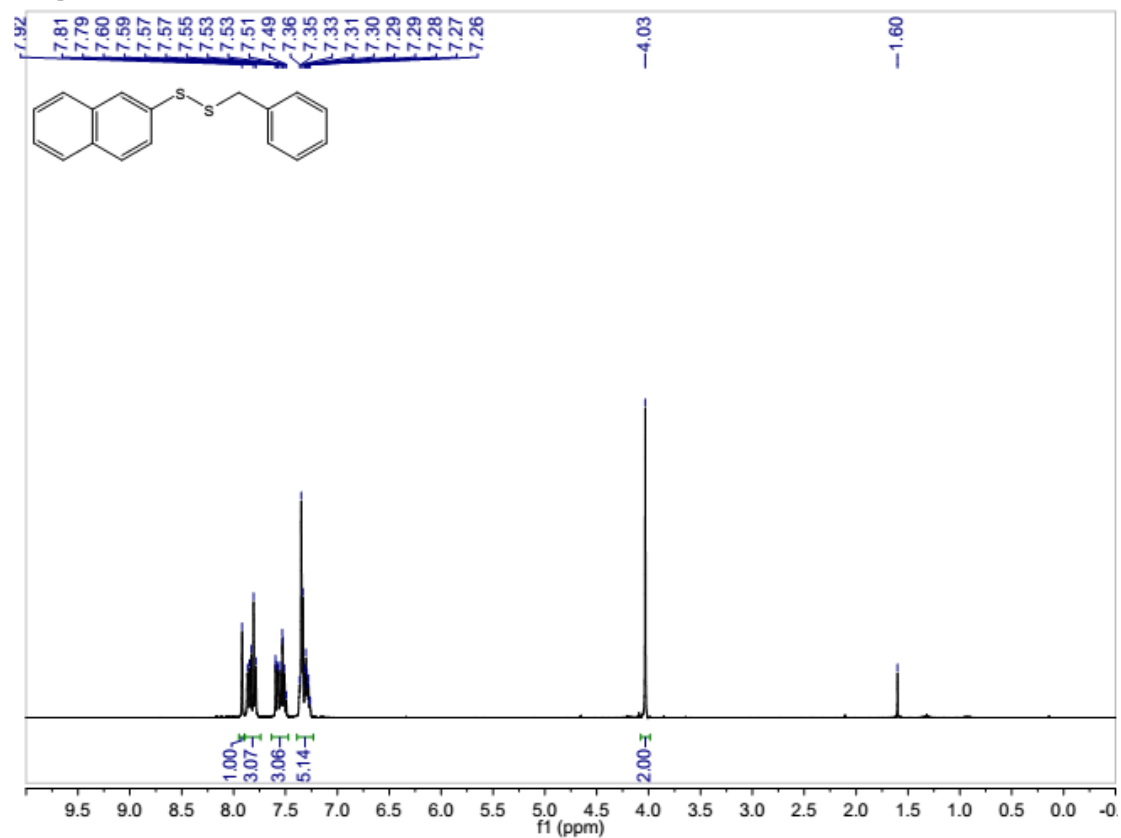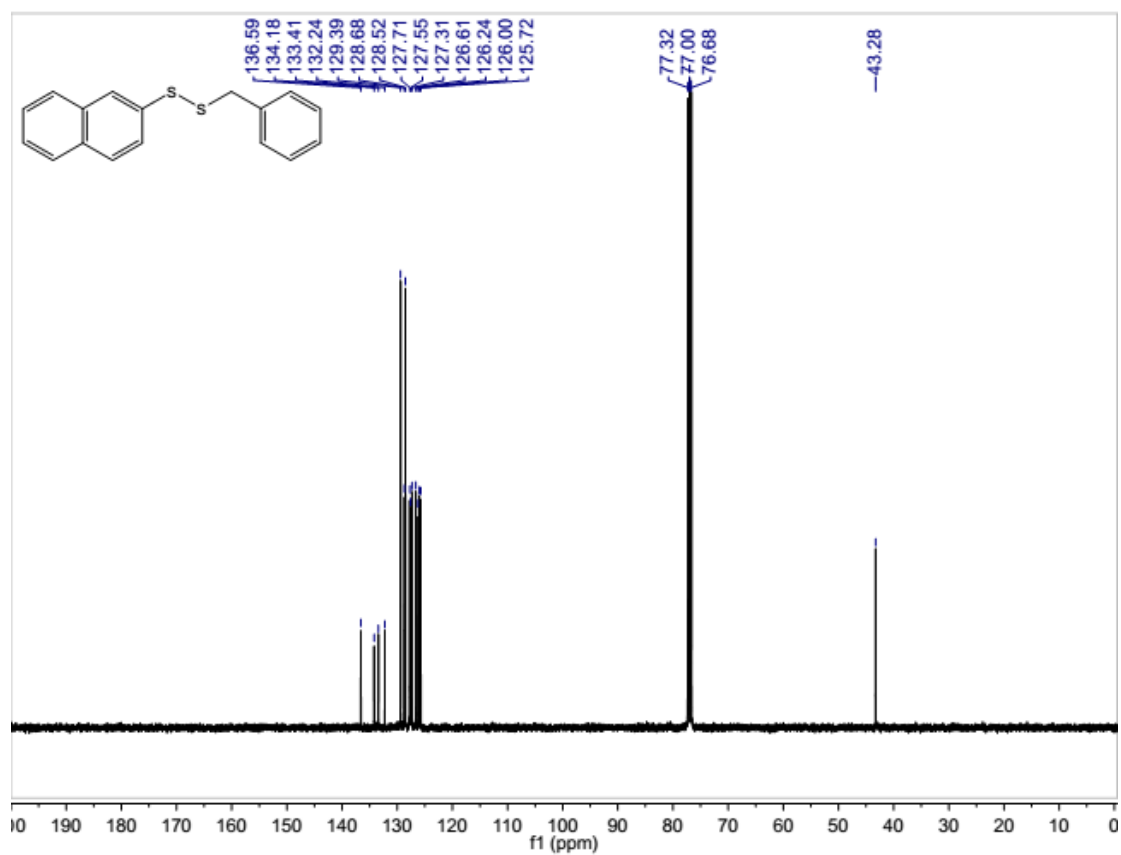

Compound **3g**:

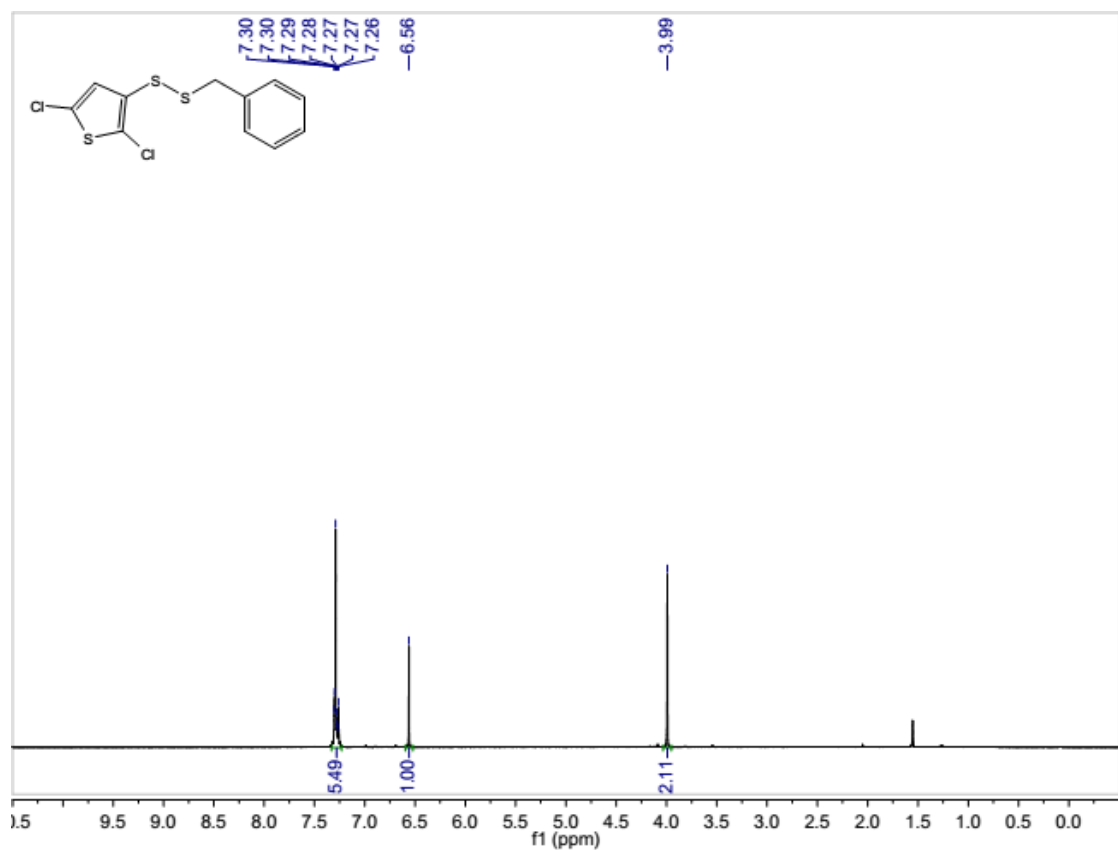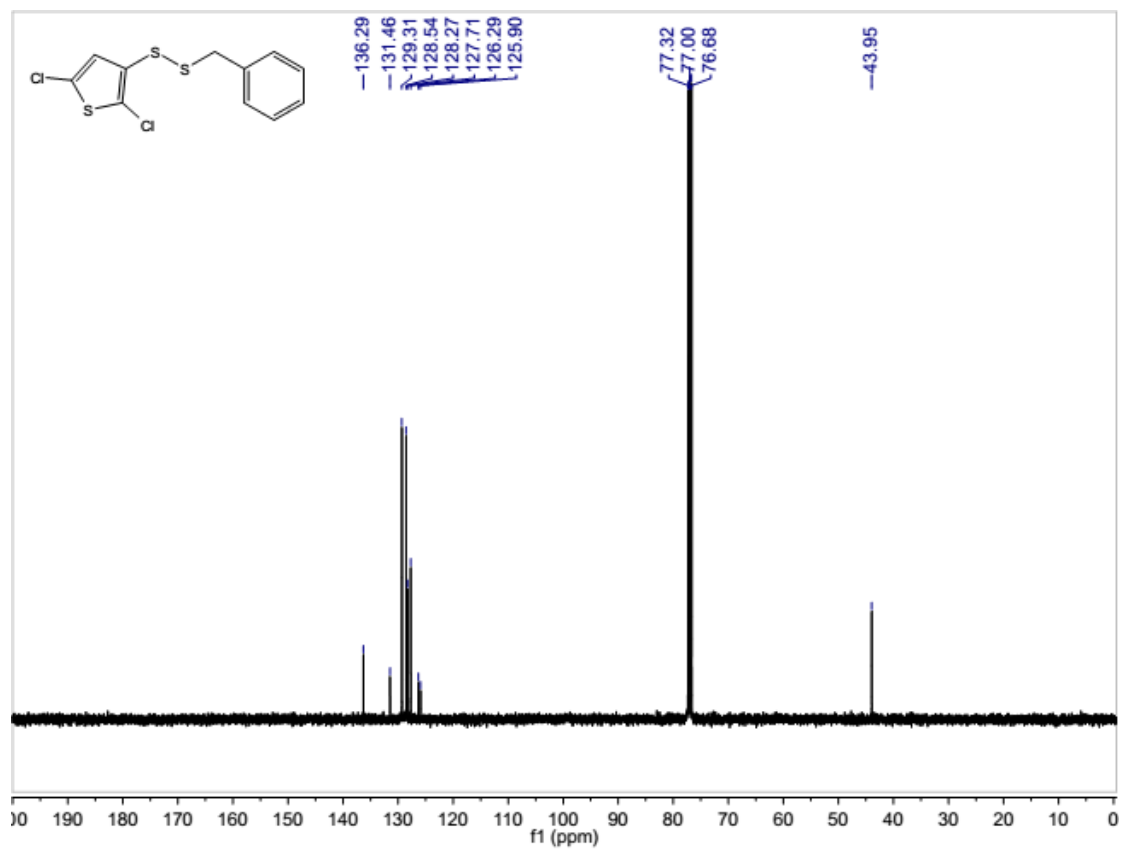

Compound **3h**:

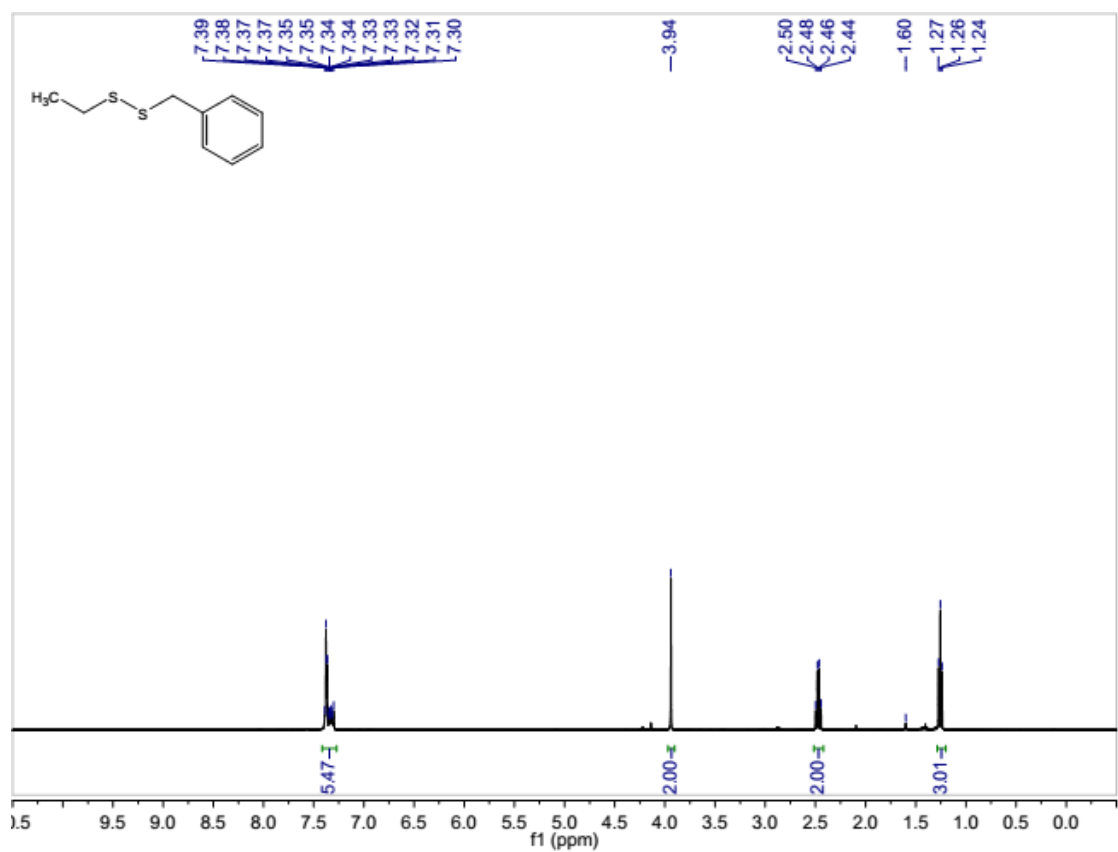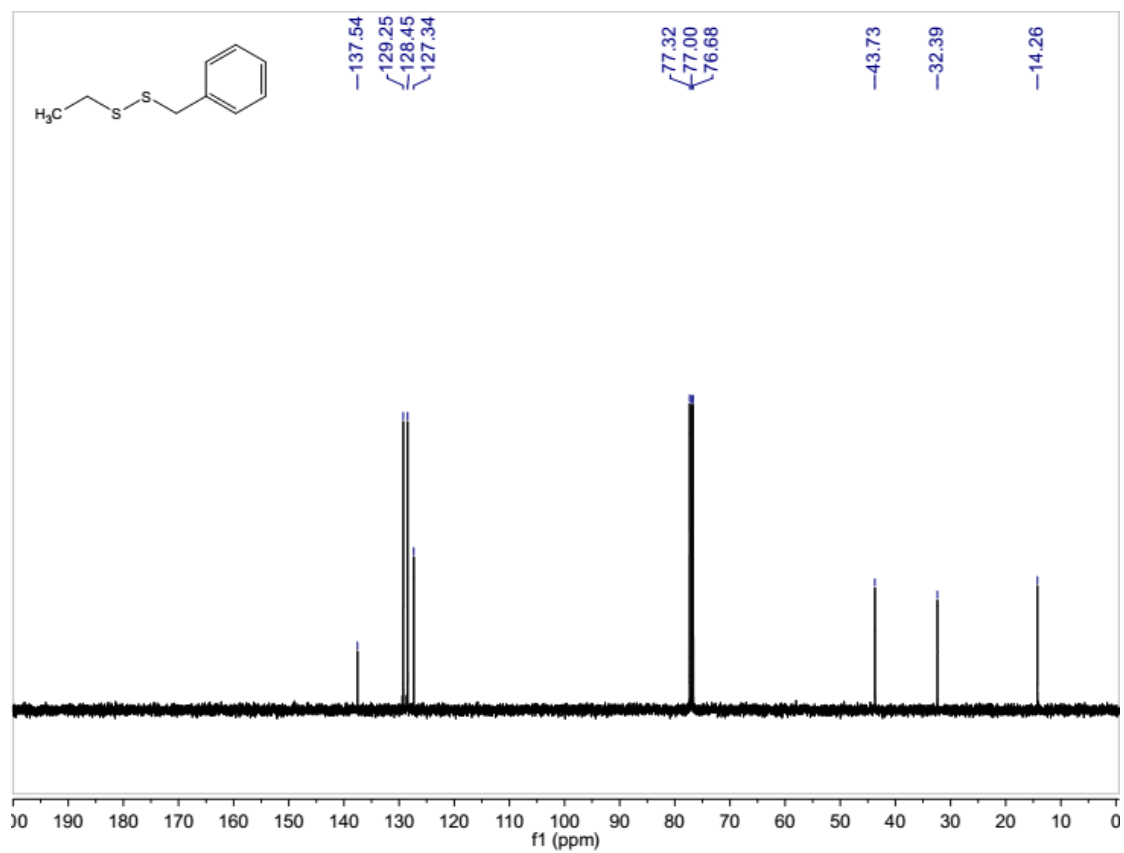

Compound 3i:

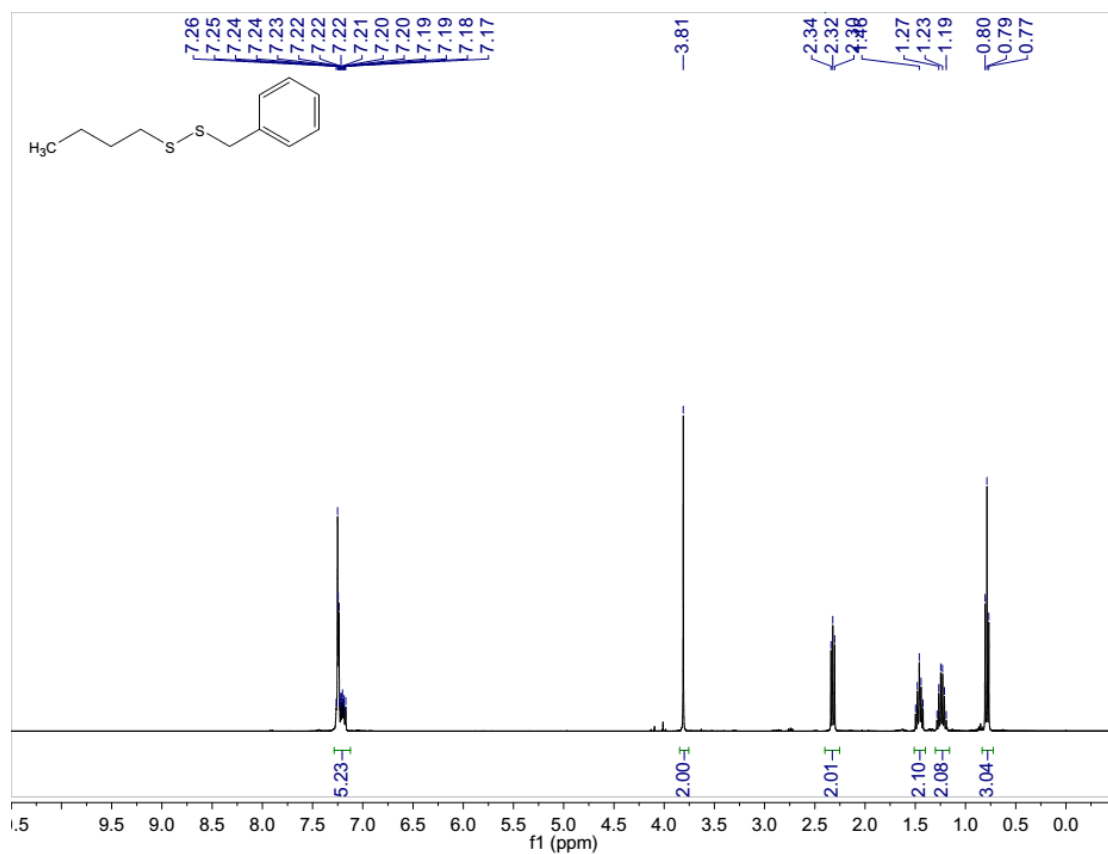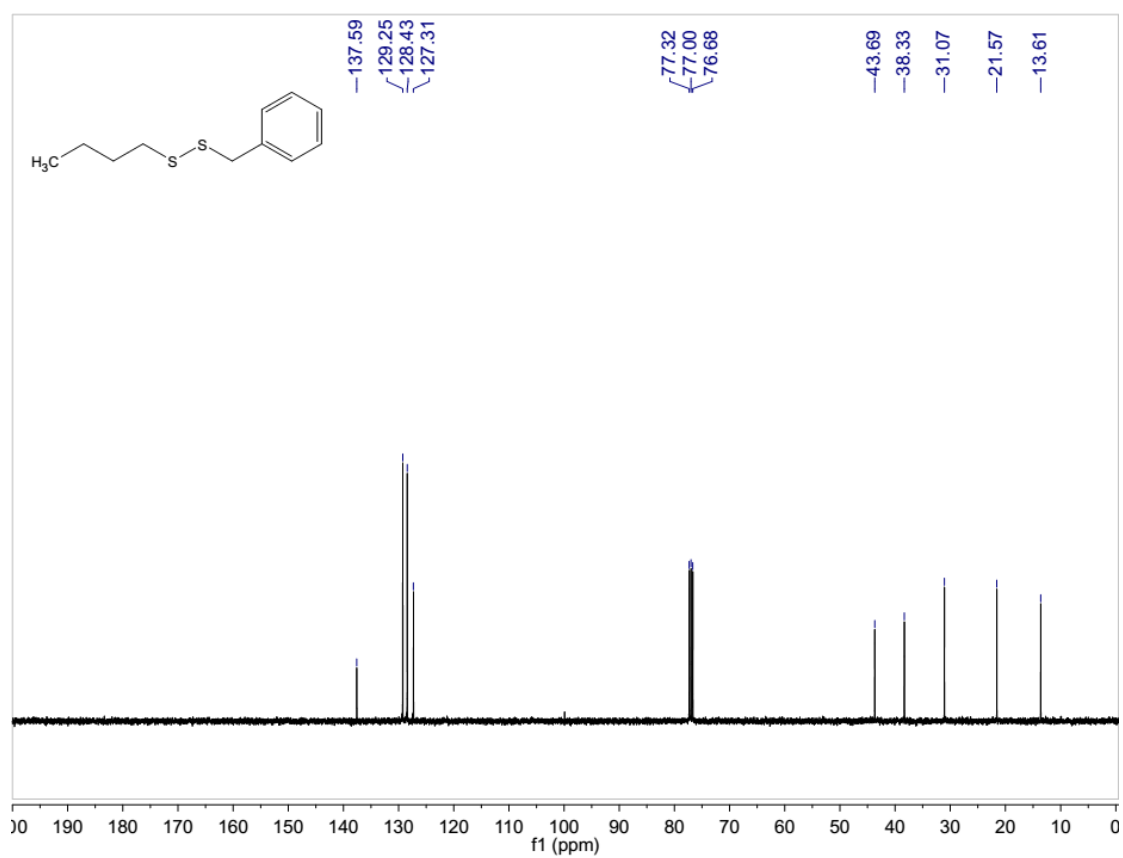

Compound 3j:

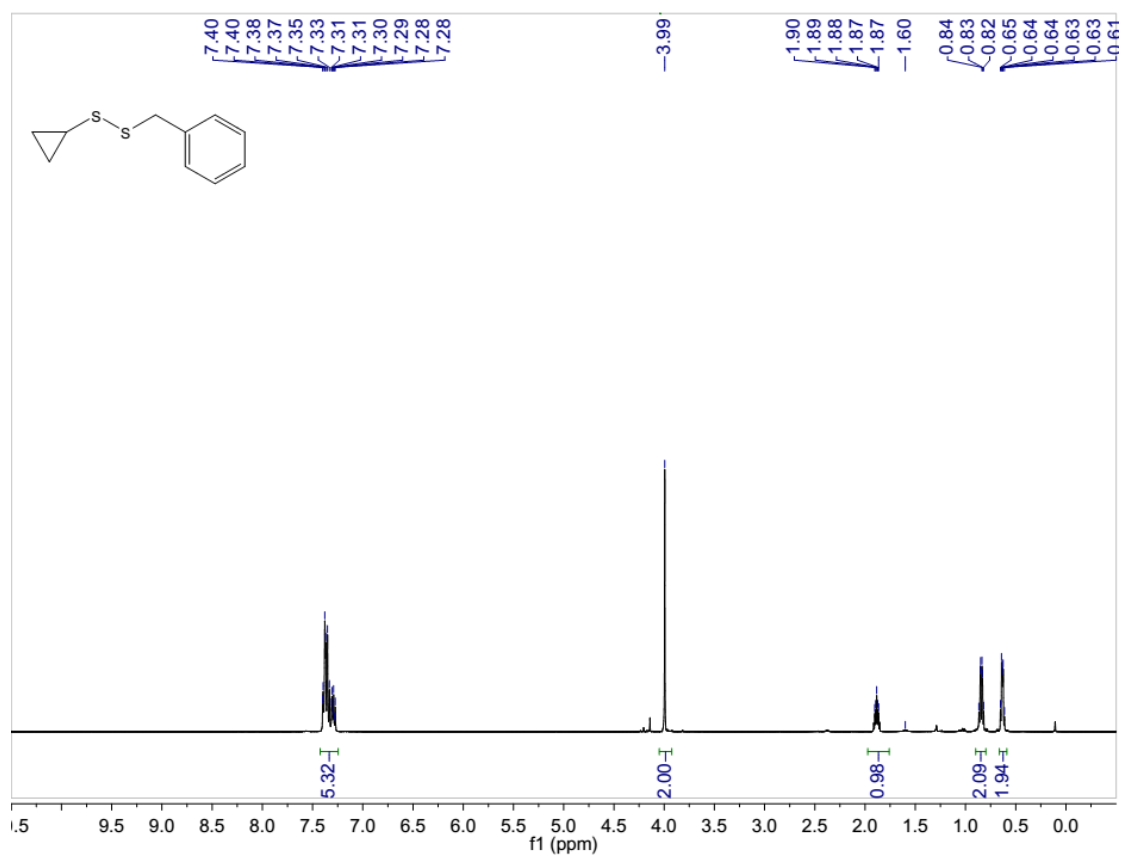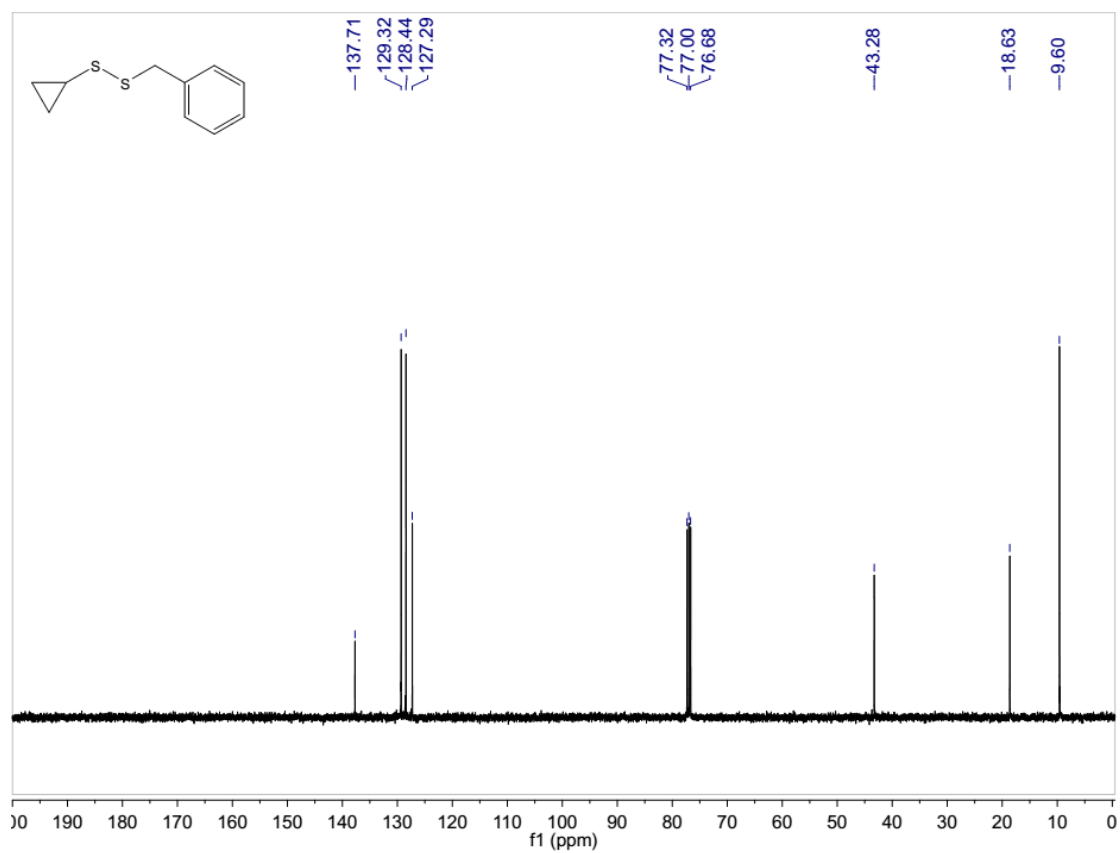

Compound **3k**:

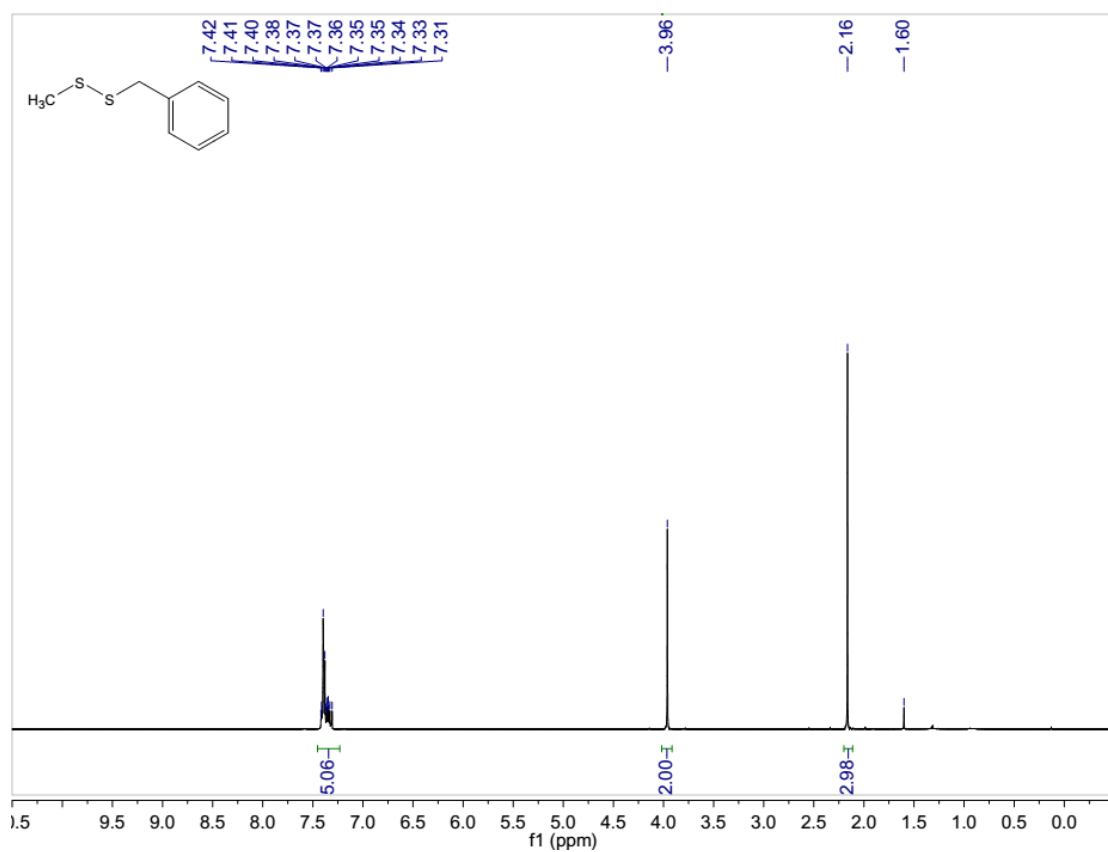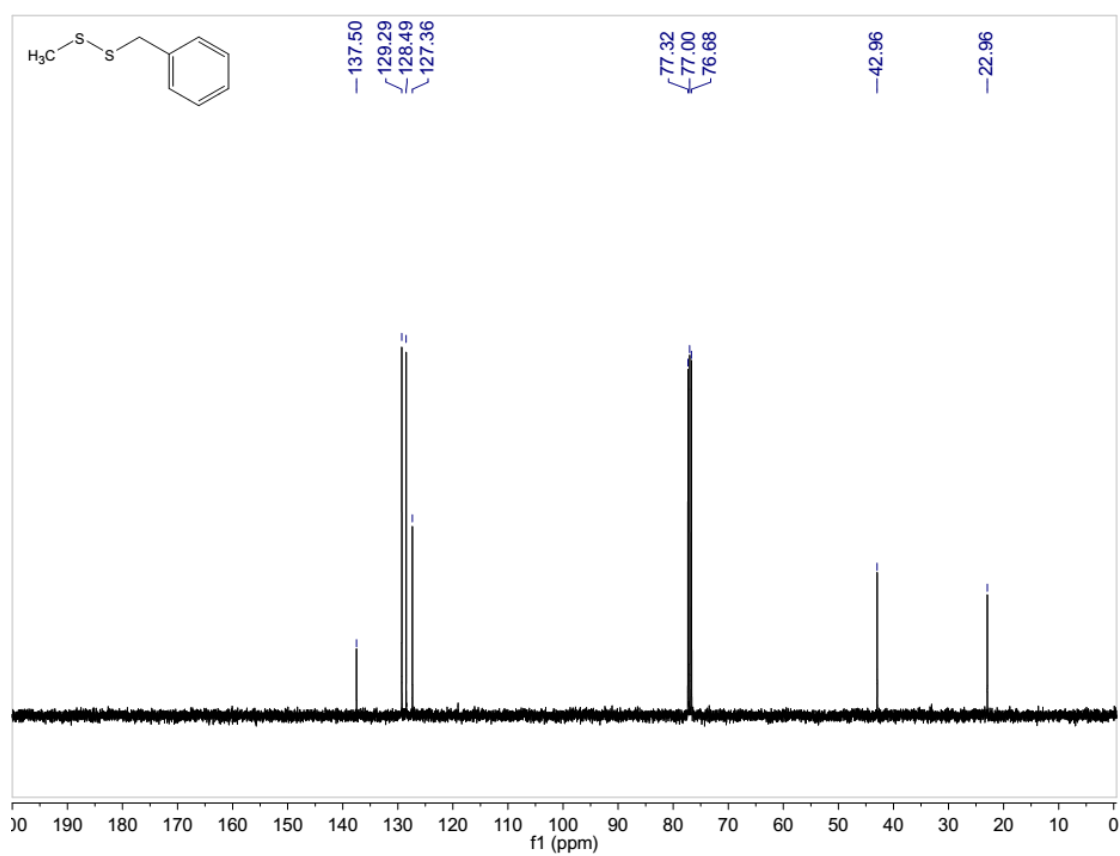



Compound 3I:

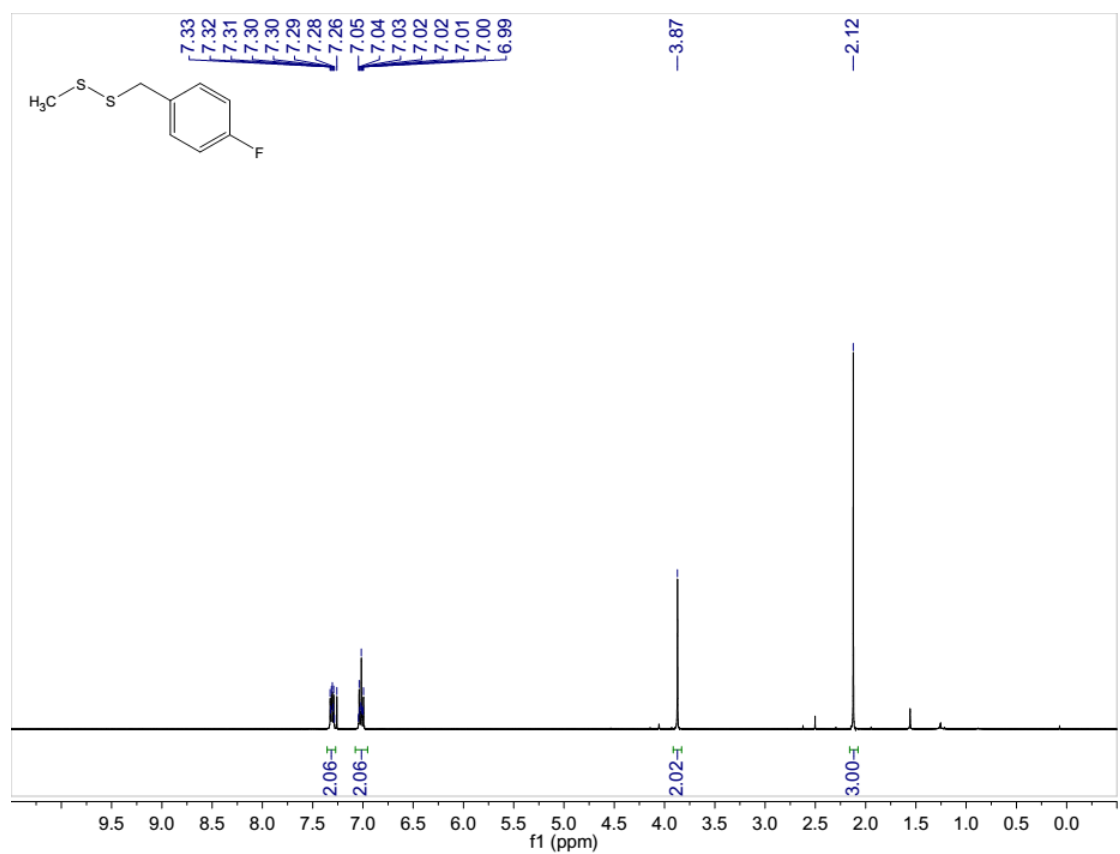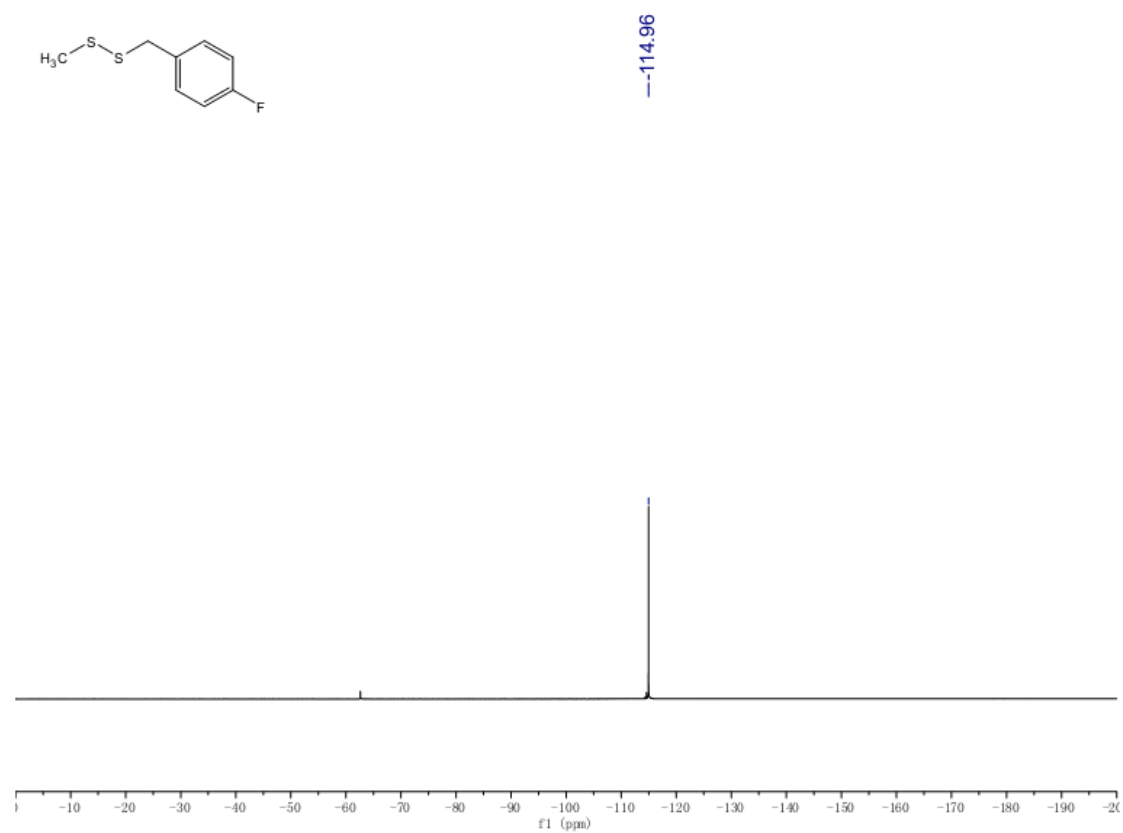

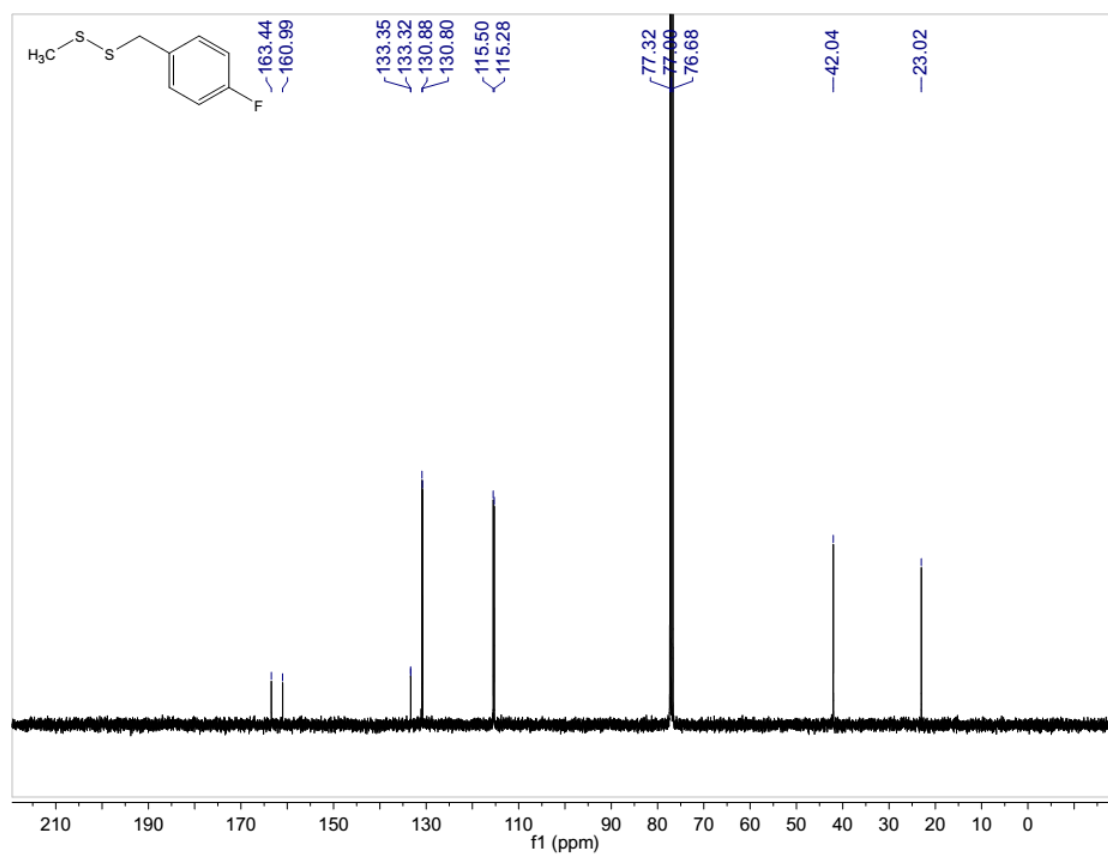

Compound **3m**:

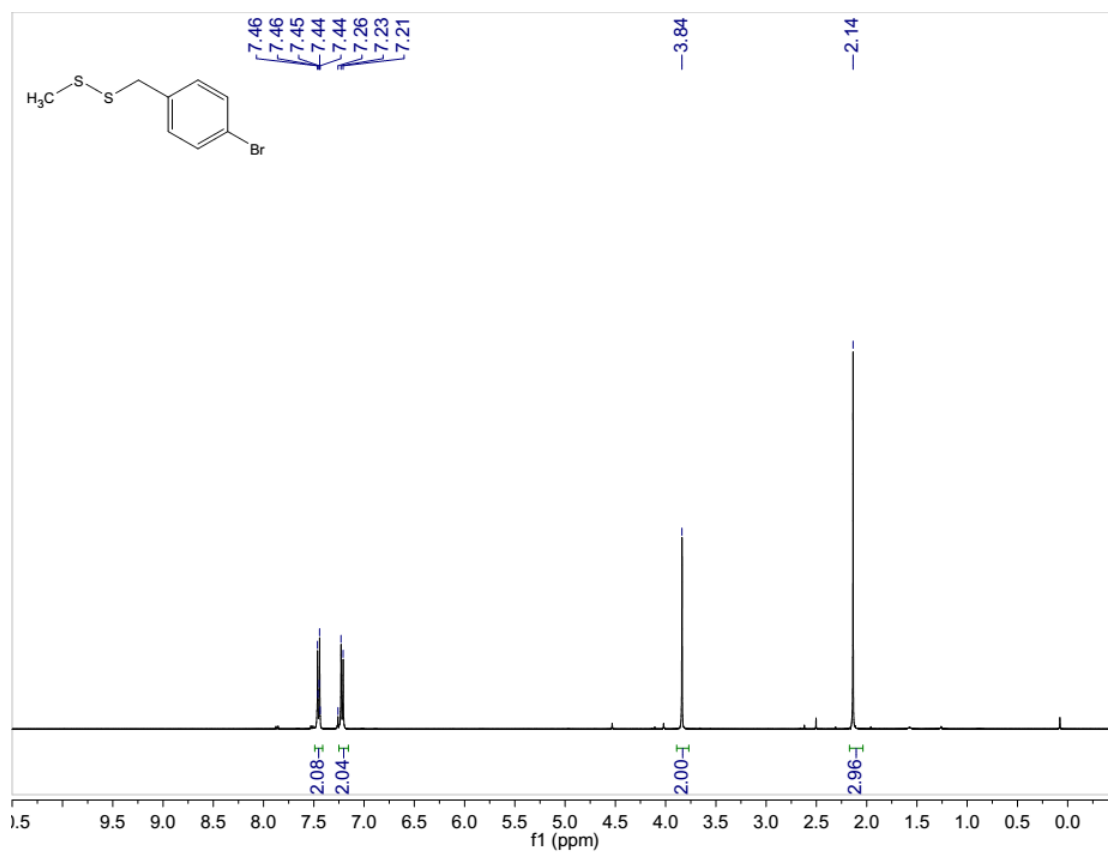

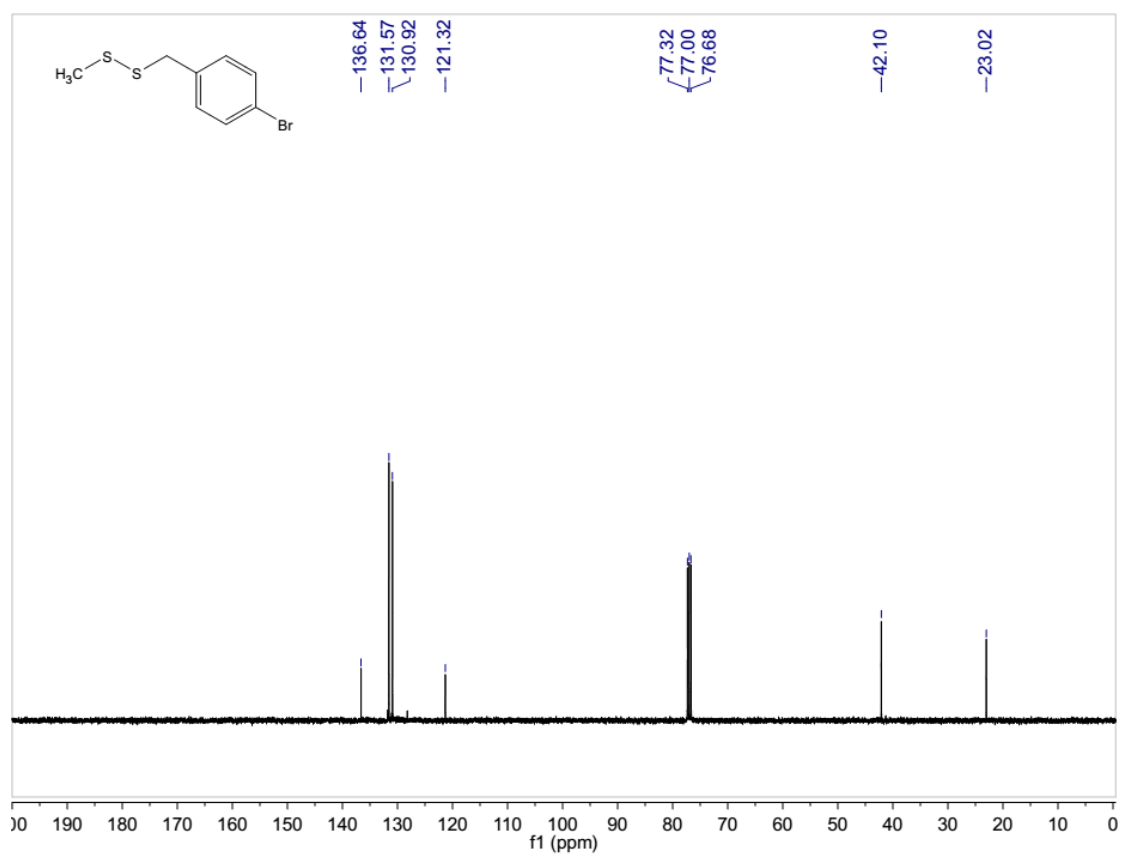

Compound **3n**:

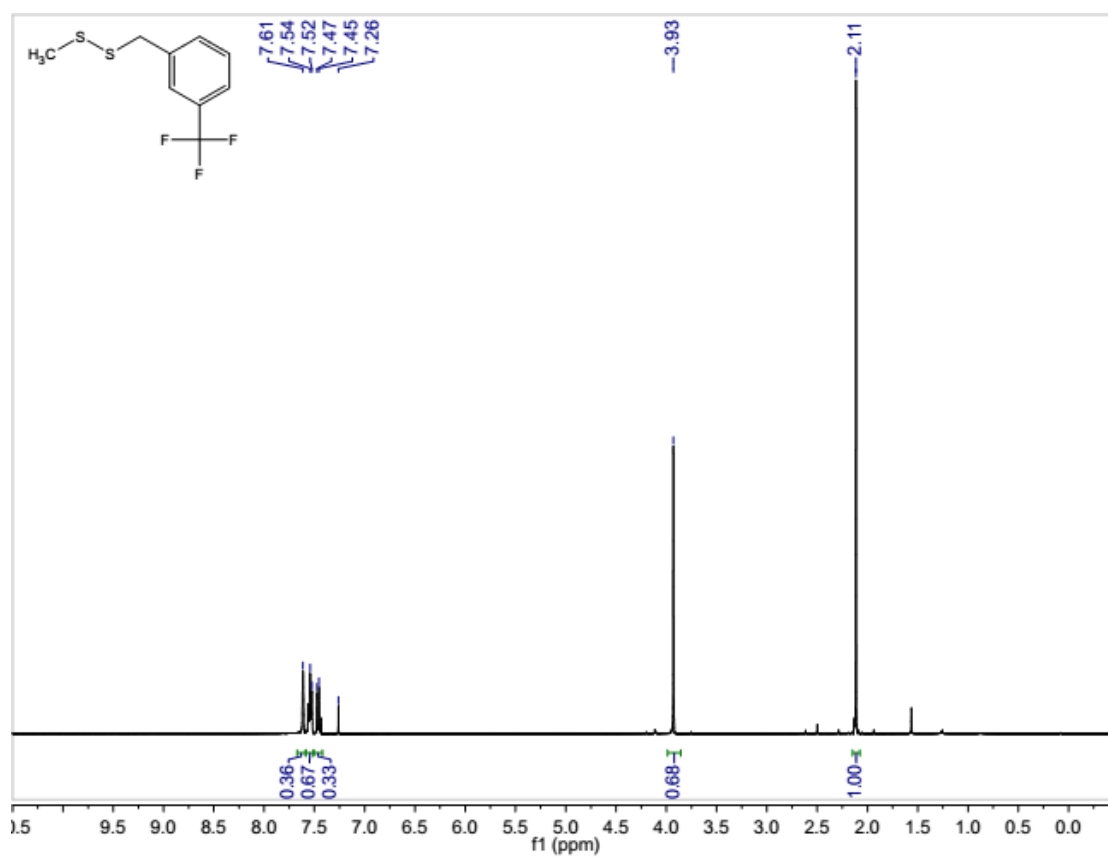

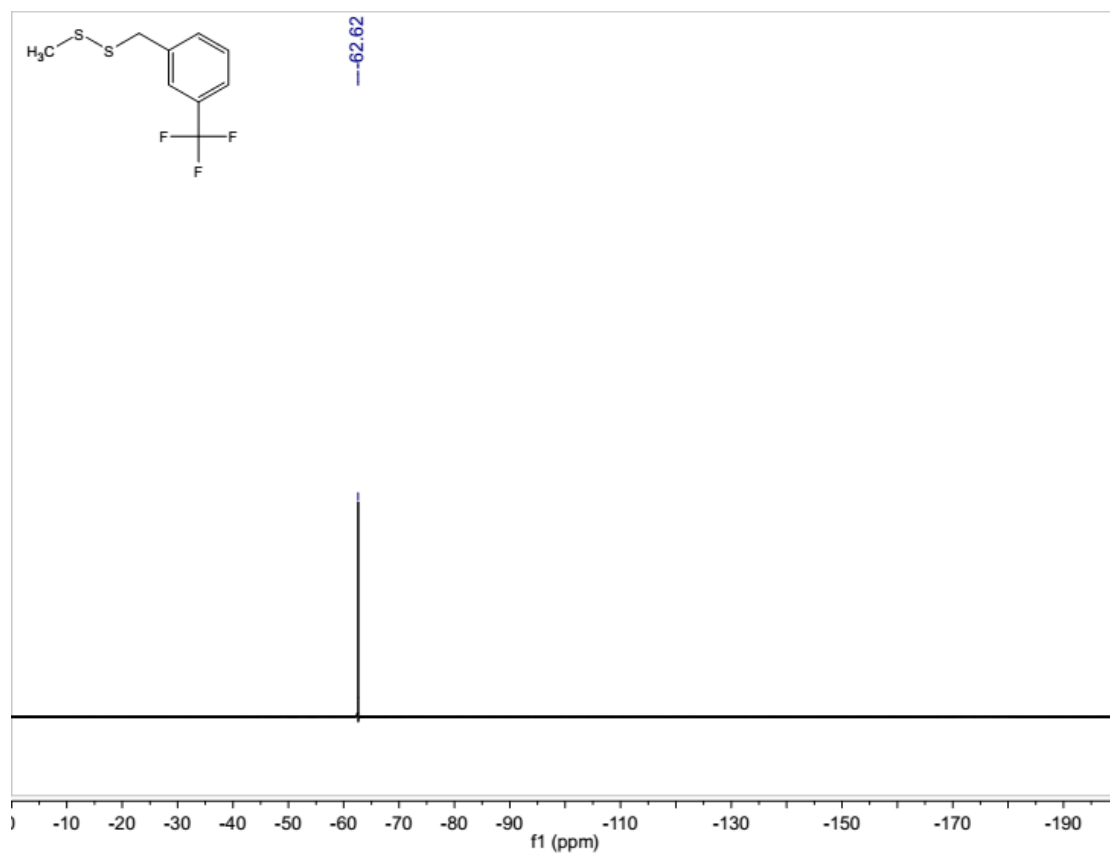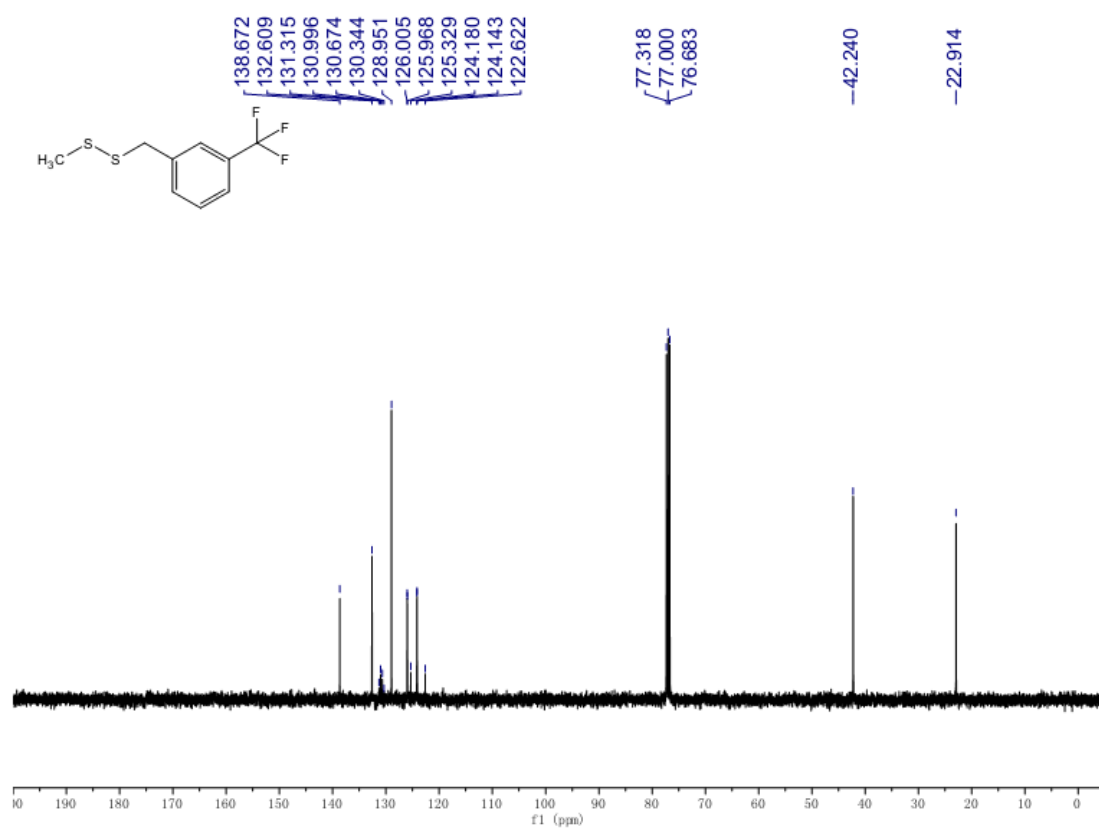

Compound **3o**:

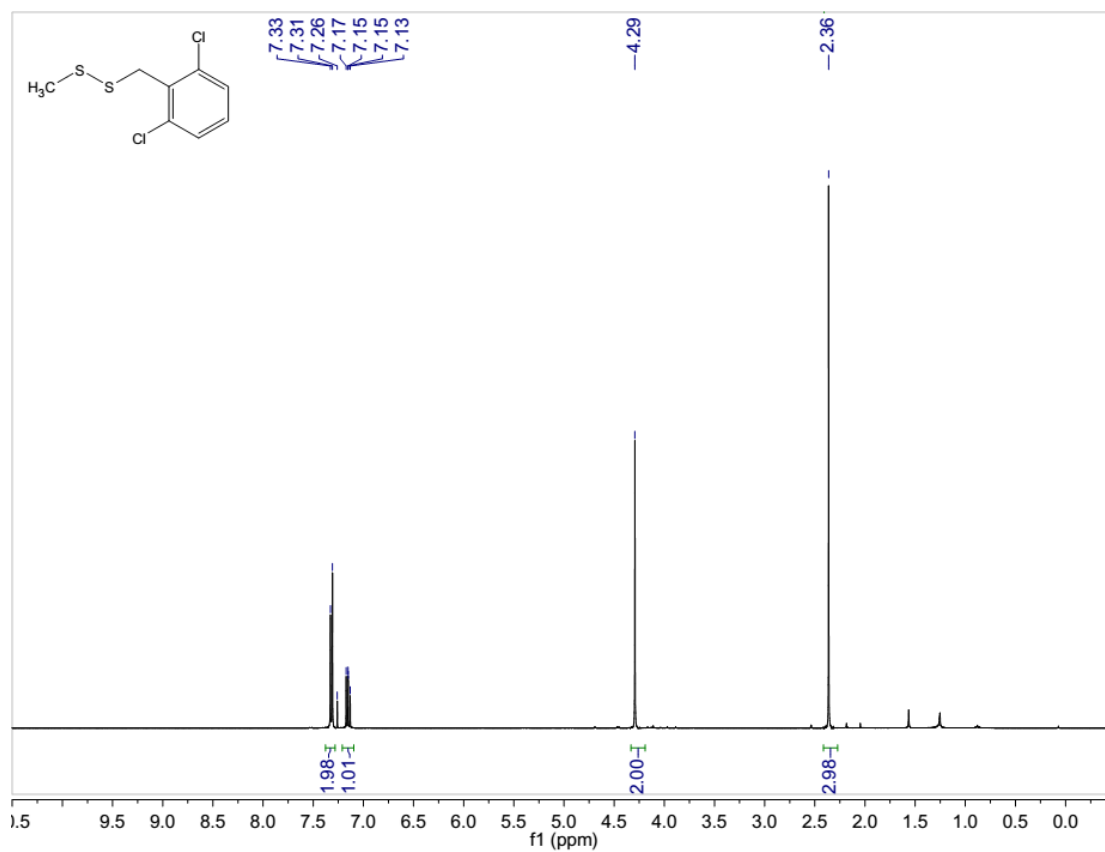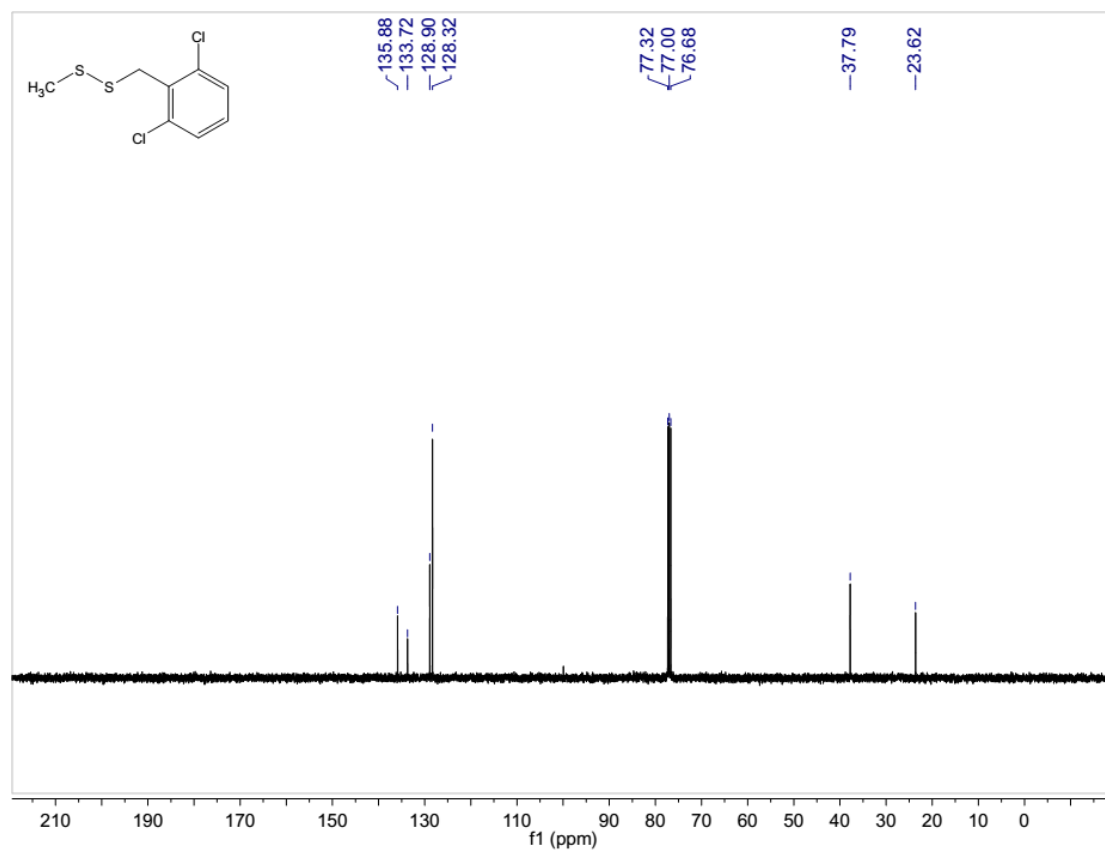

Compound **3p**:

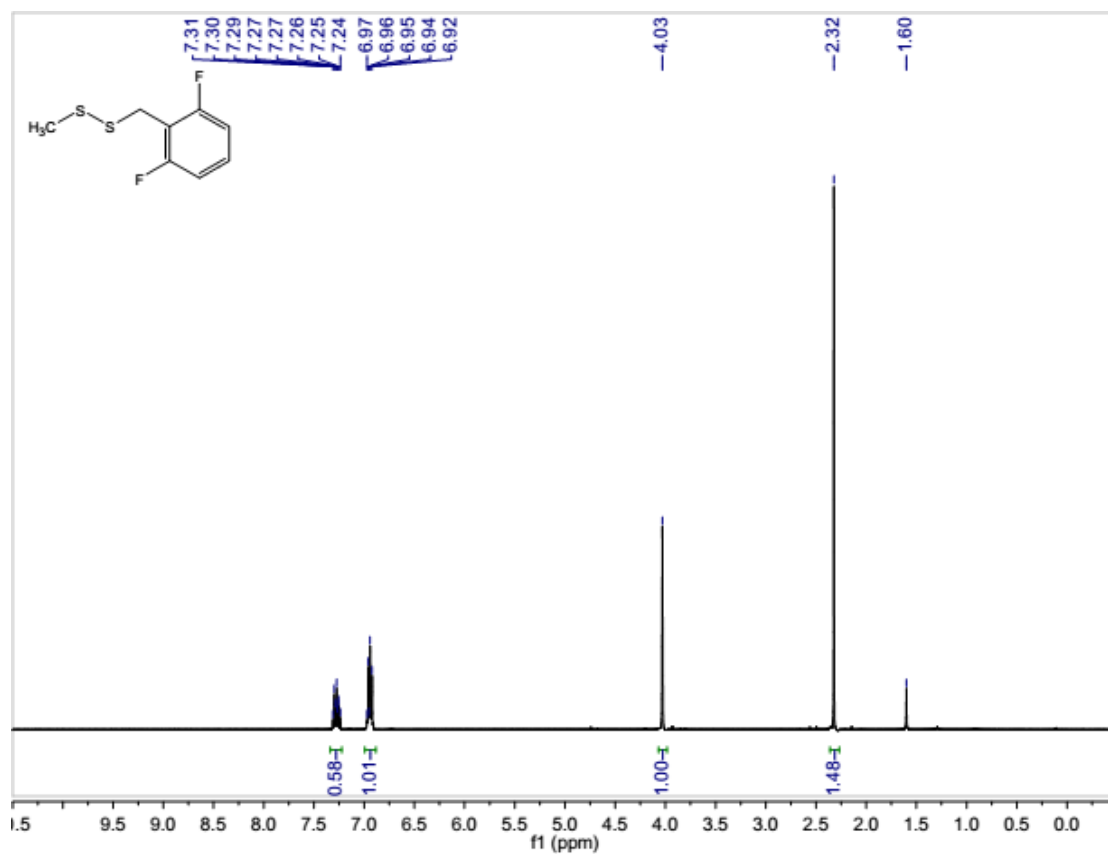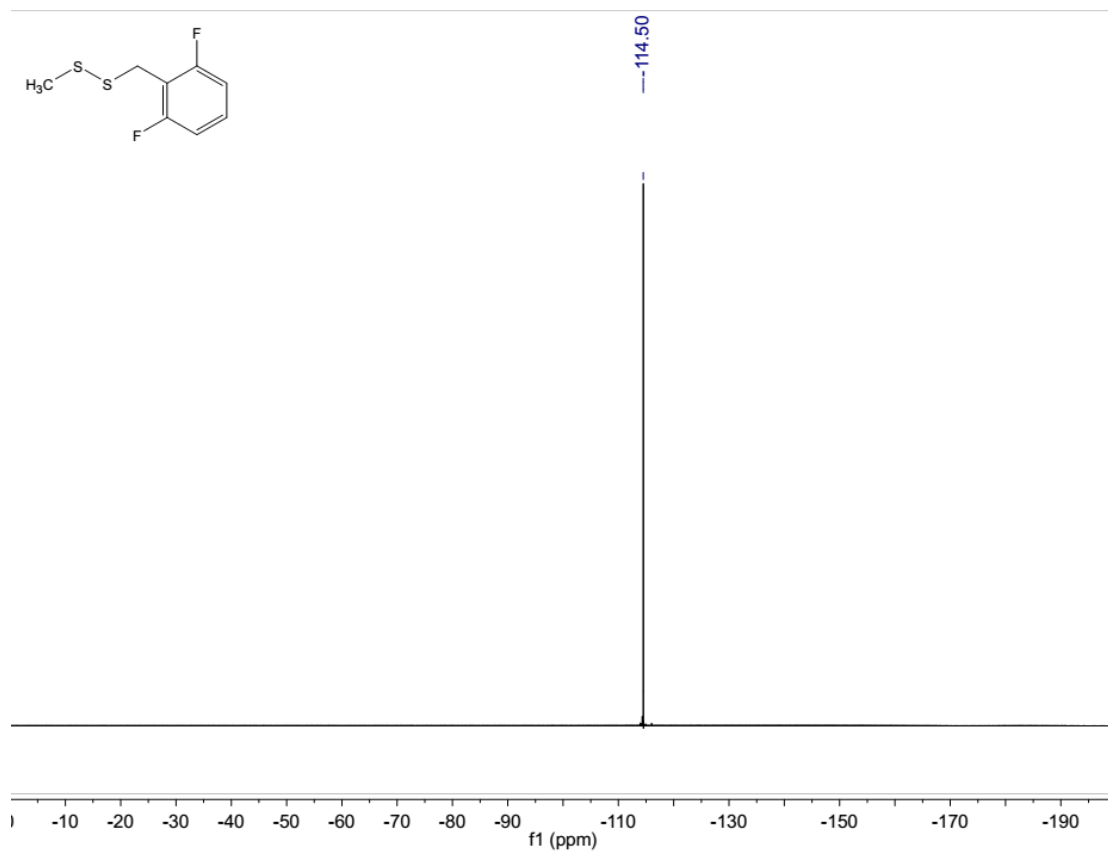

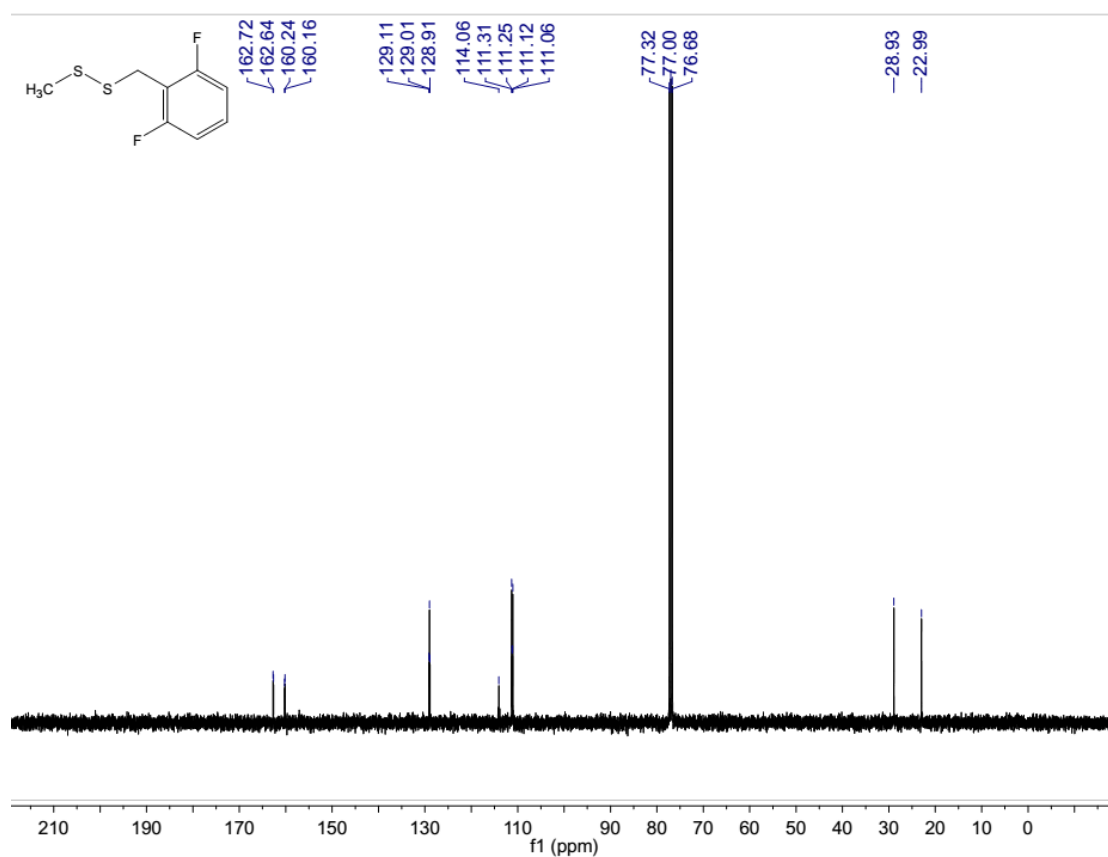

Compound **3q**:

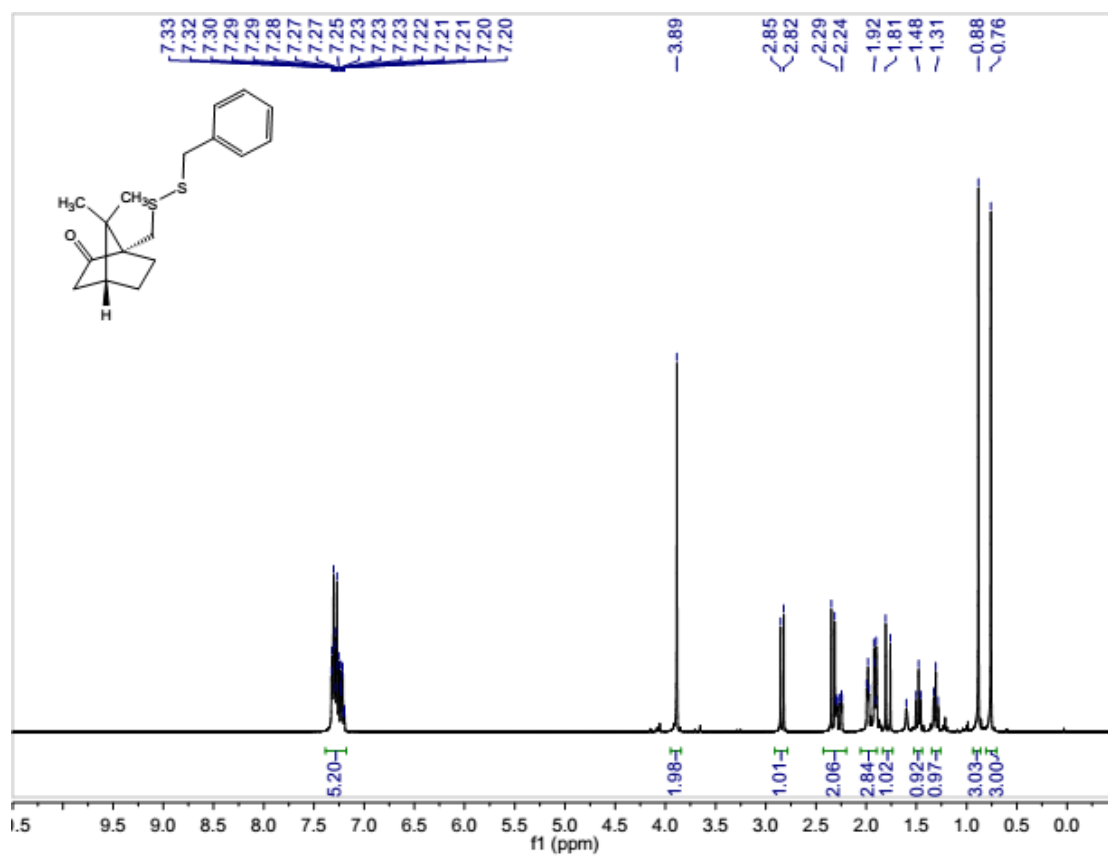

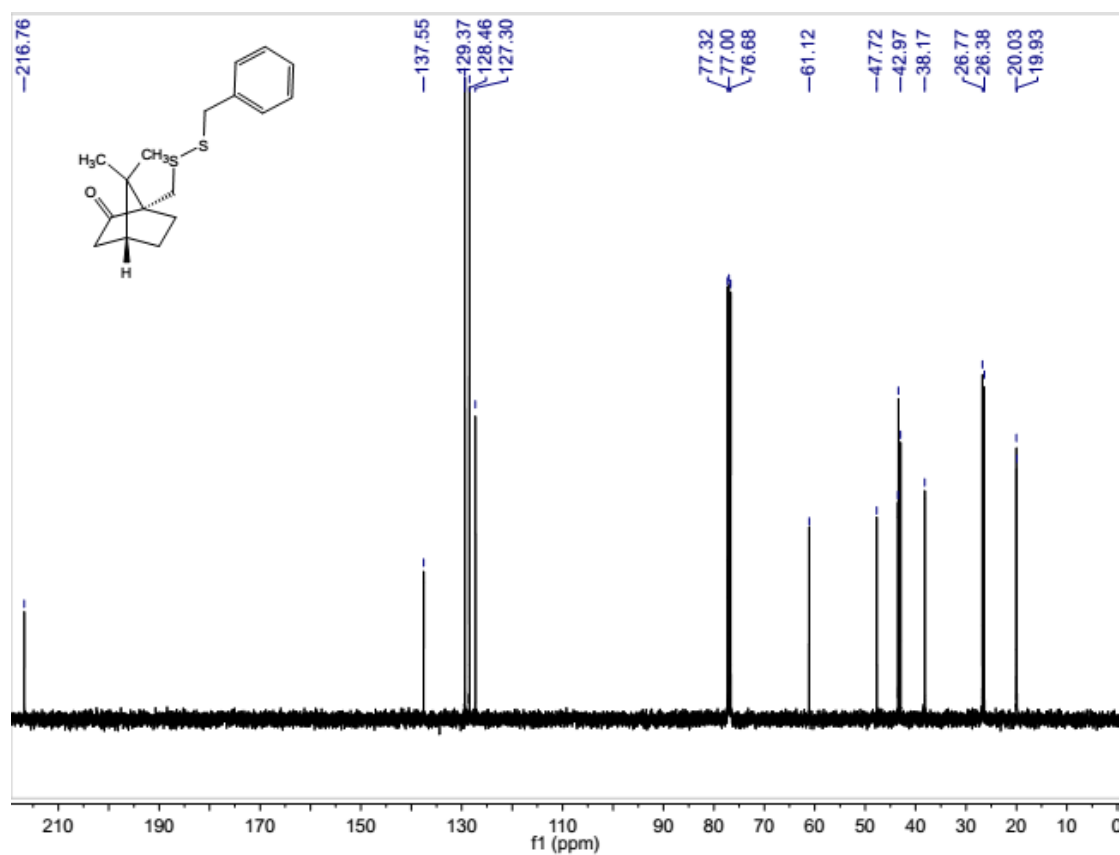

Compound **3r**:

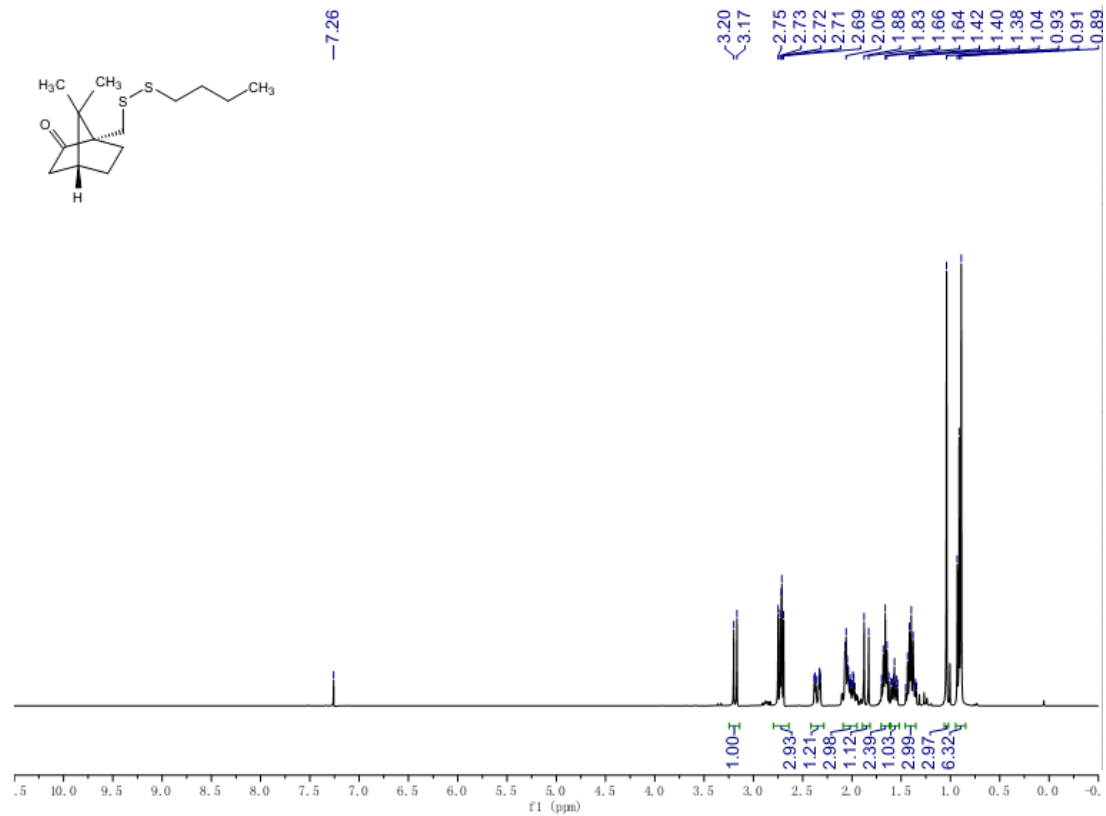



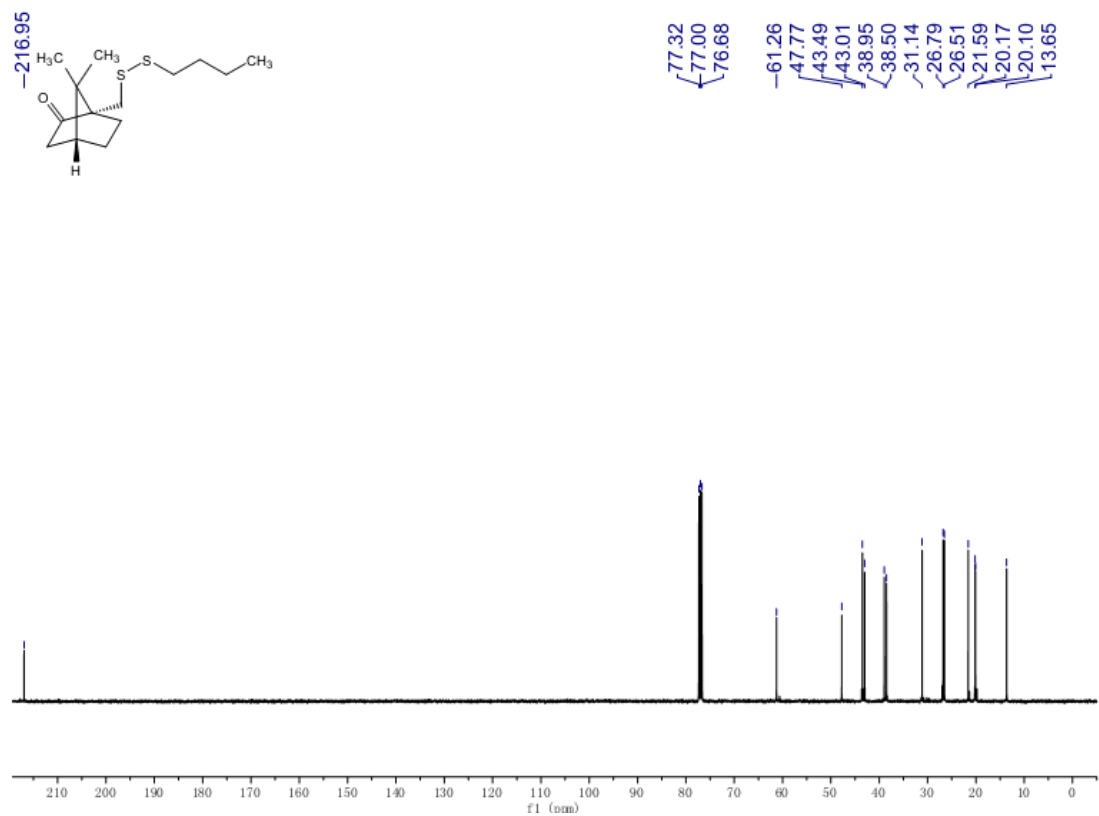

Compound **3s**:

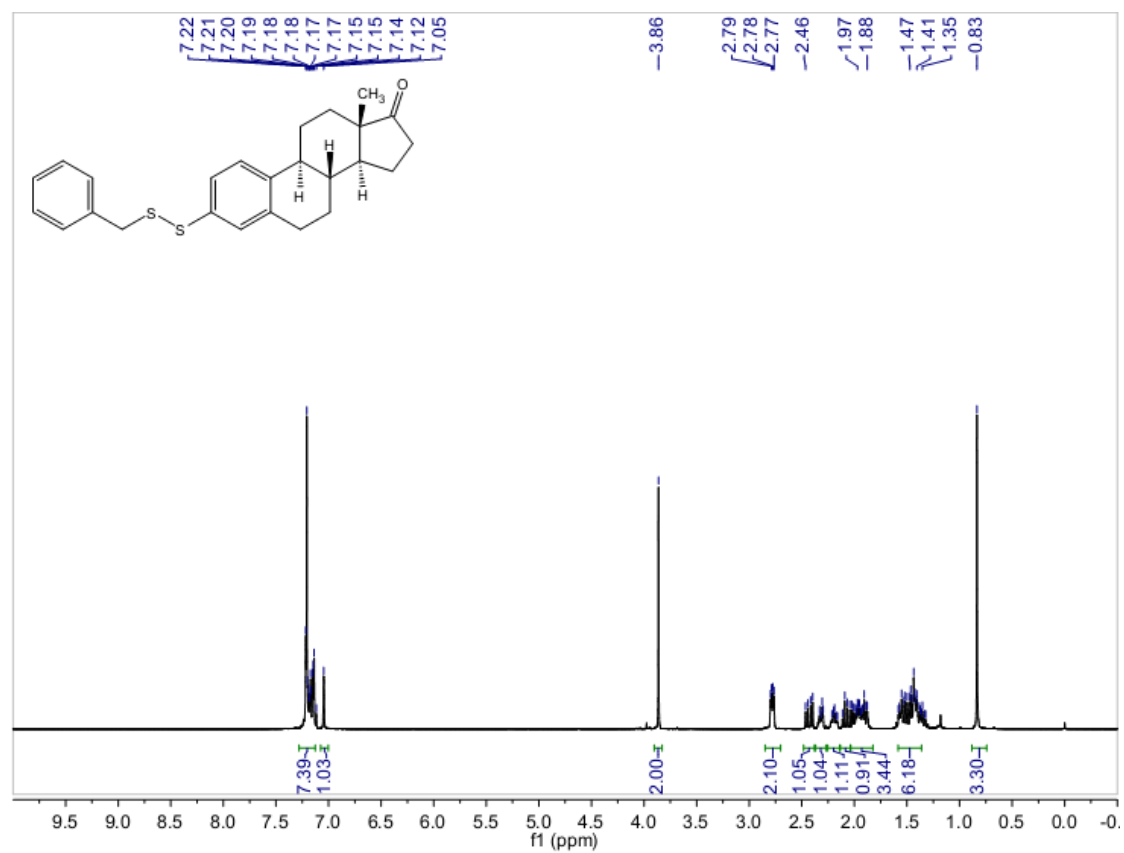

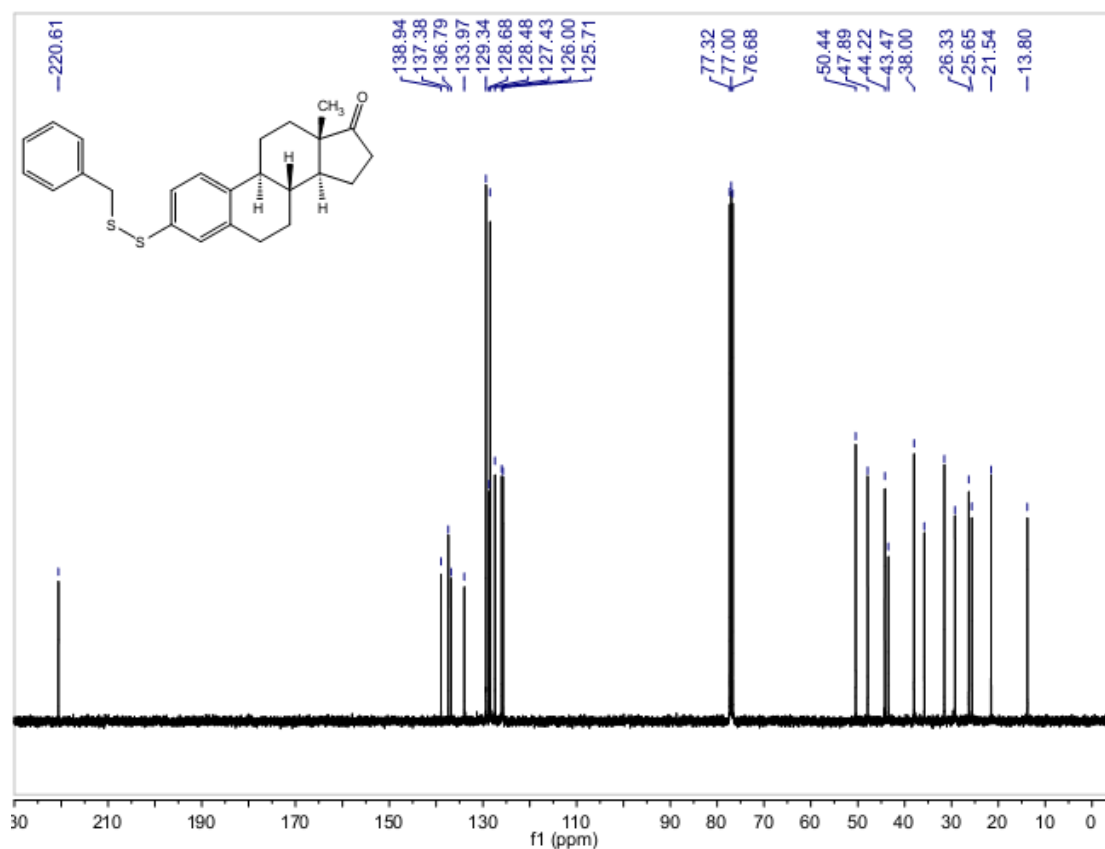

Compound 3t:

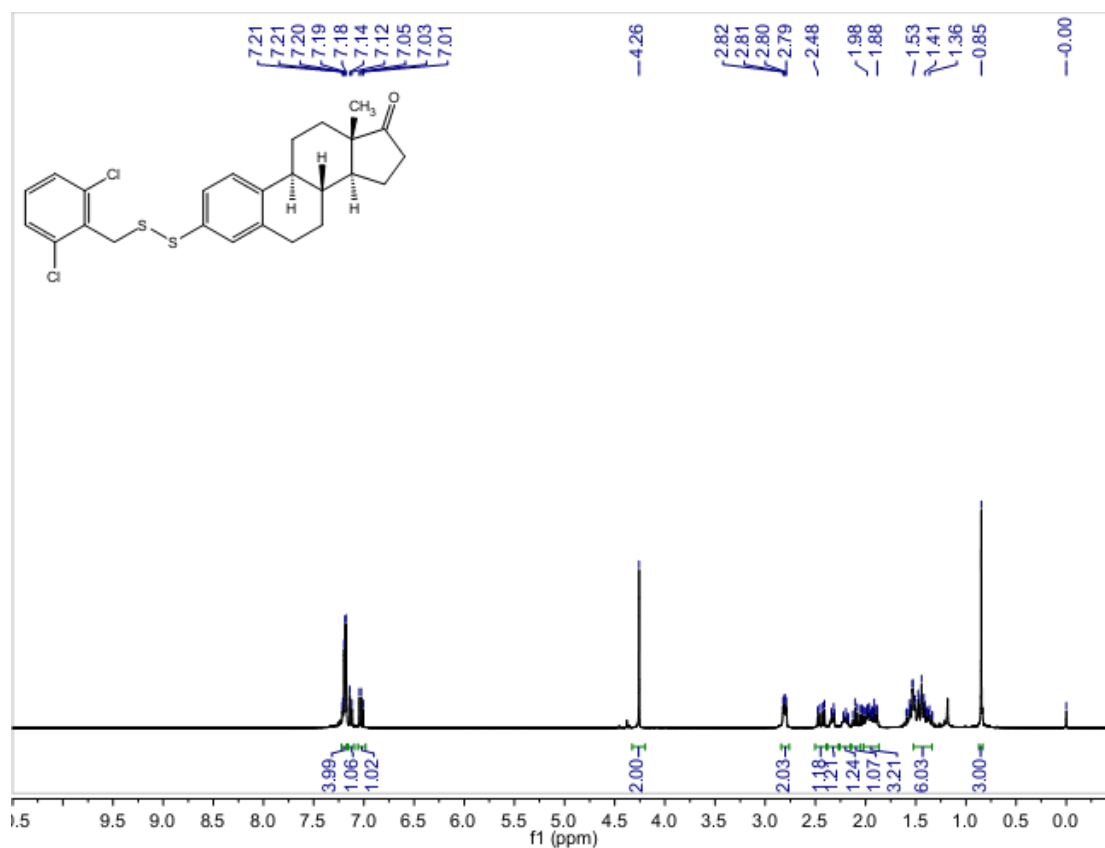

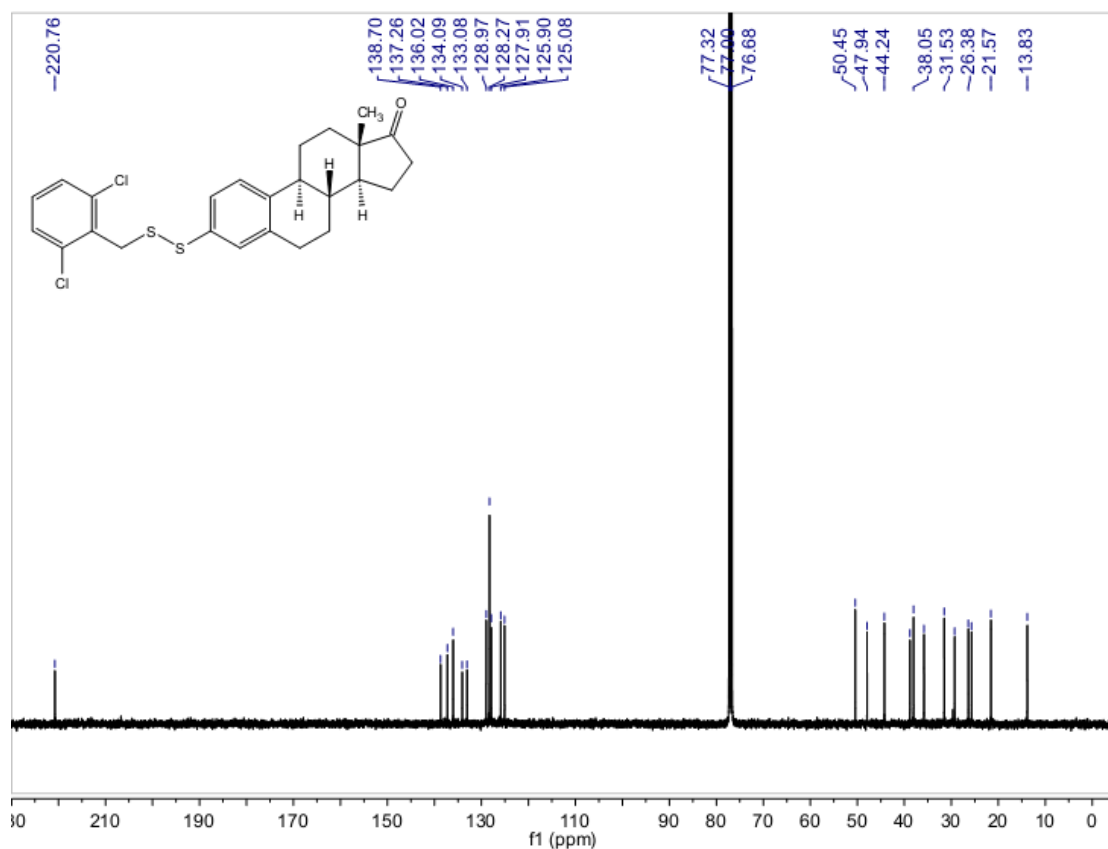

Compound **3u**:

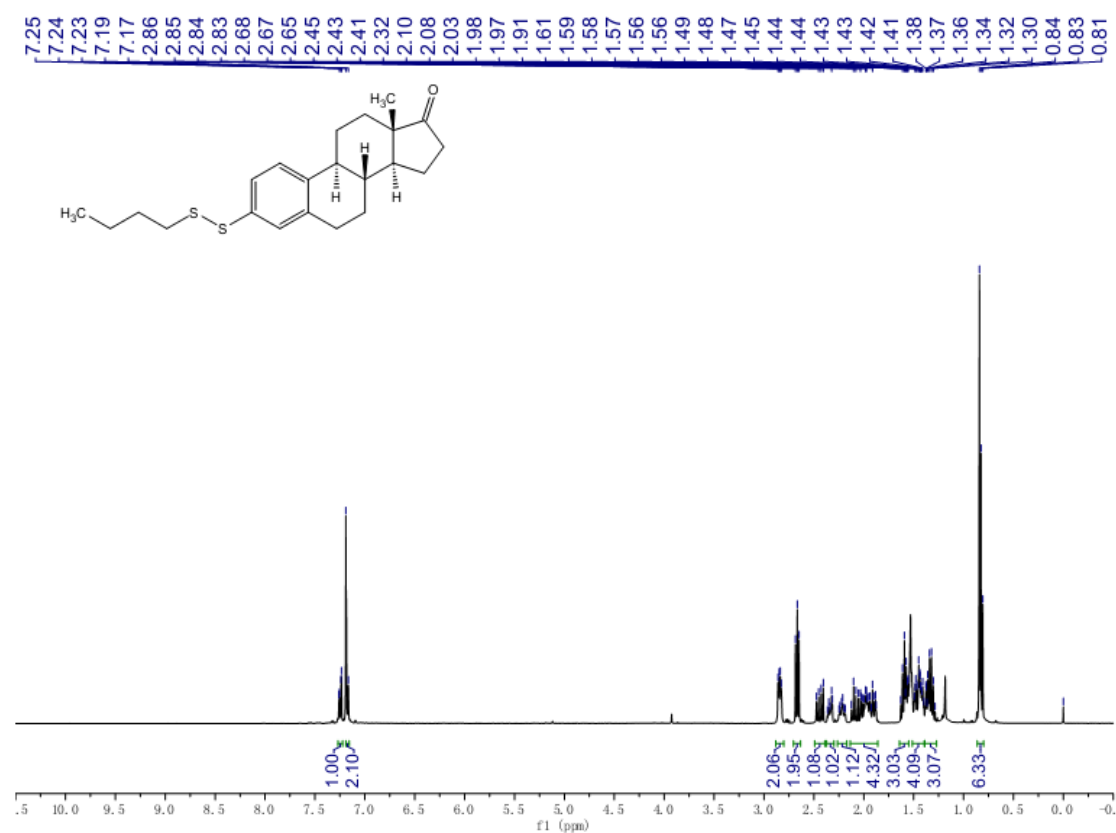

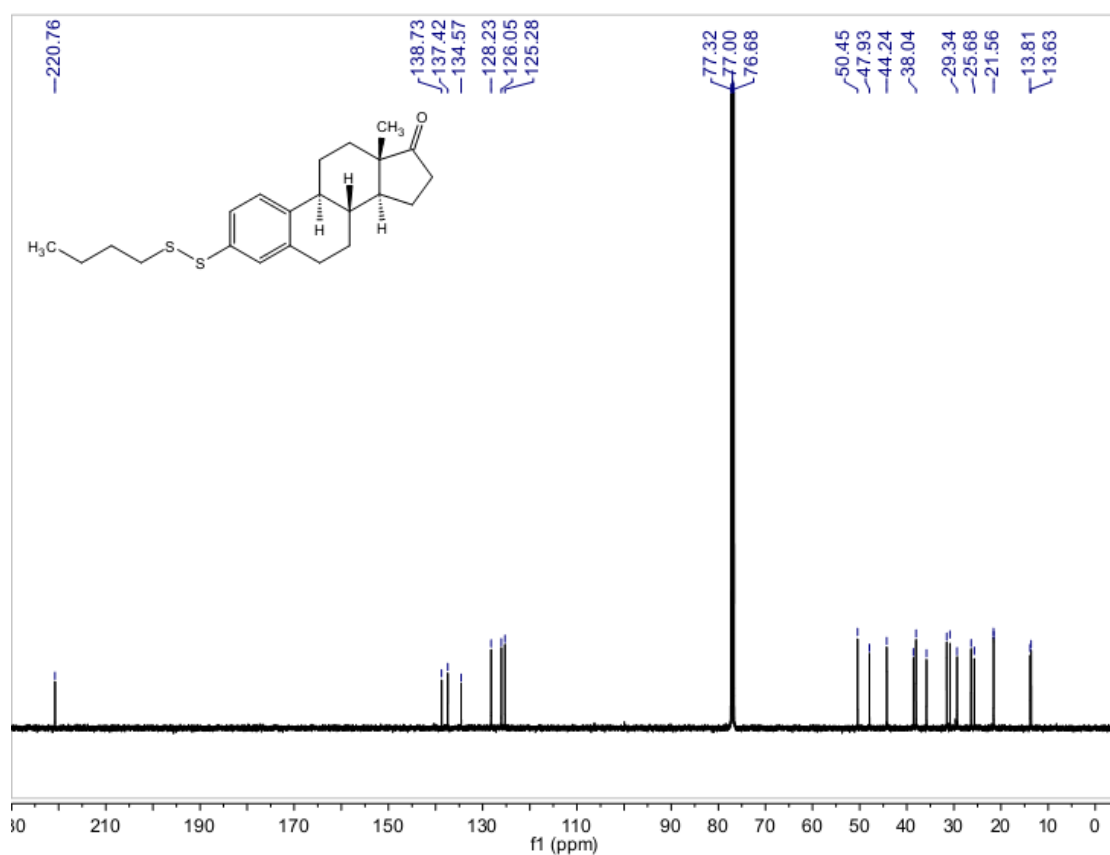

Compound 4:

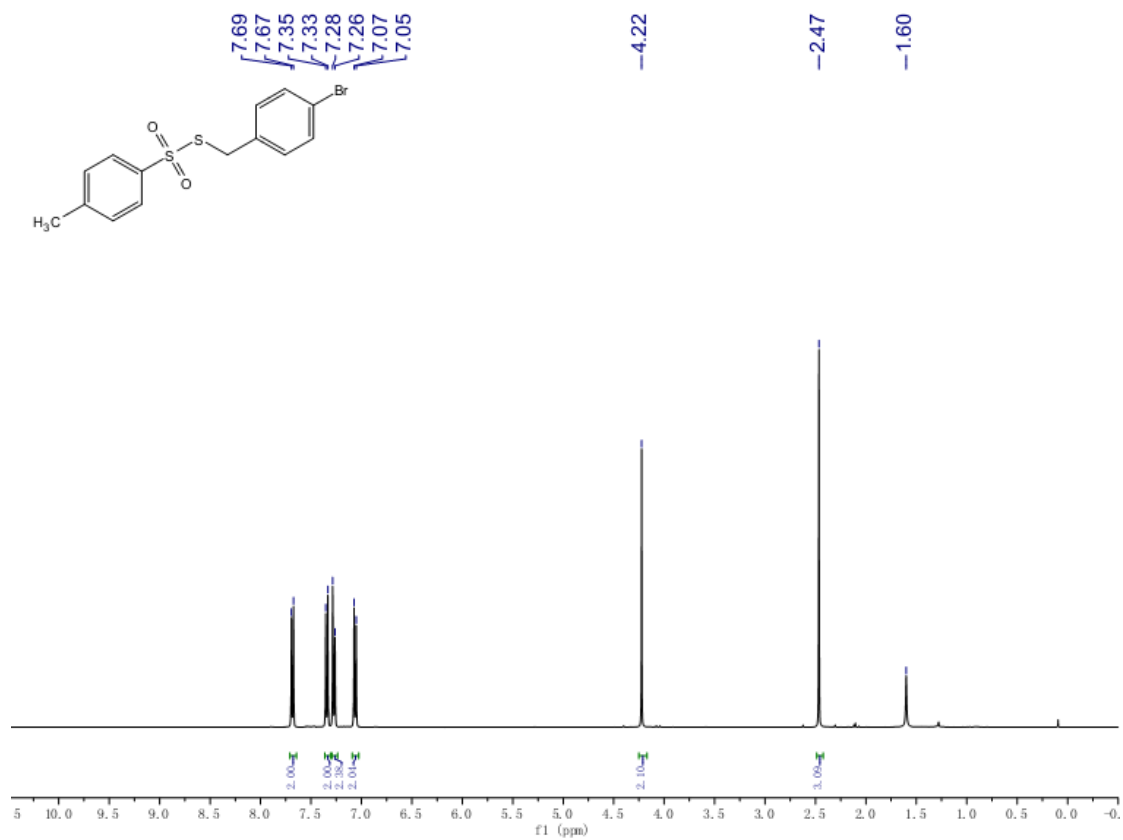

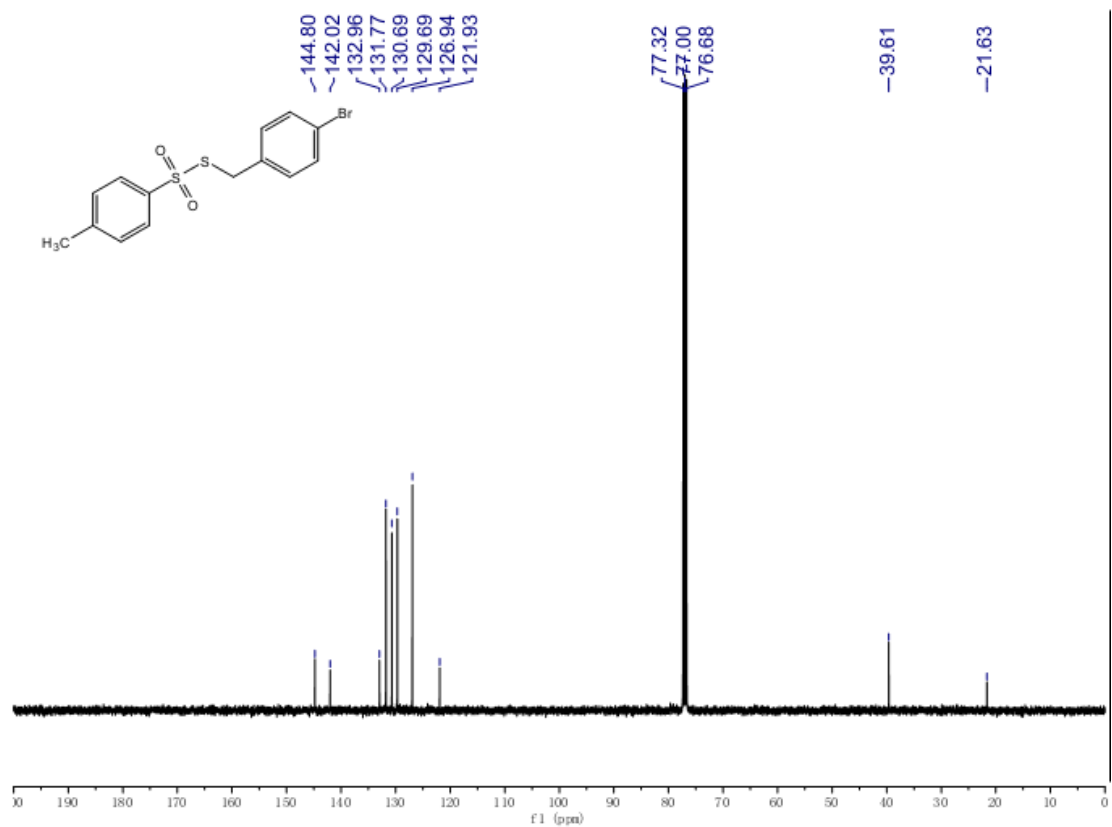

Compound 5:

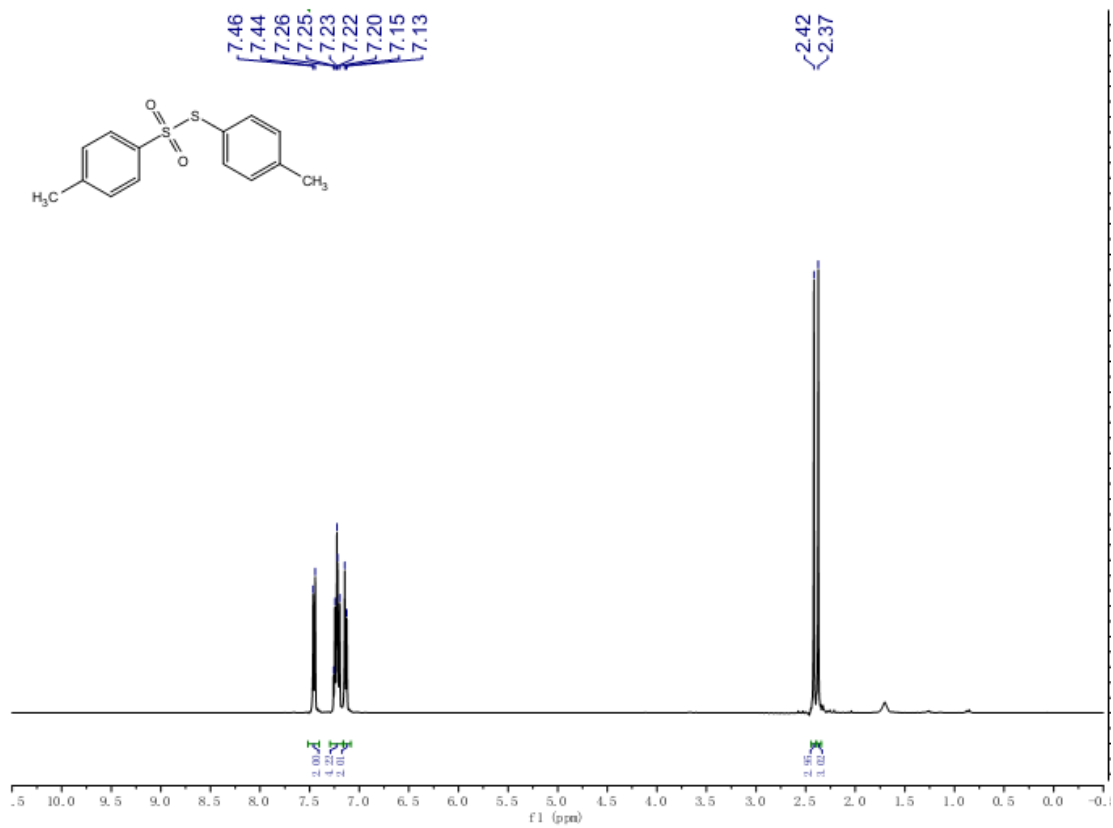

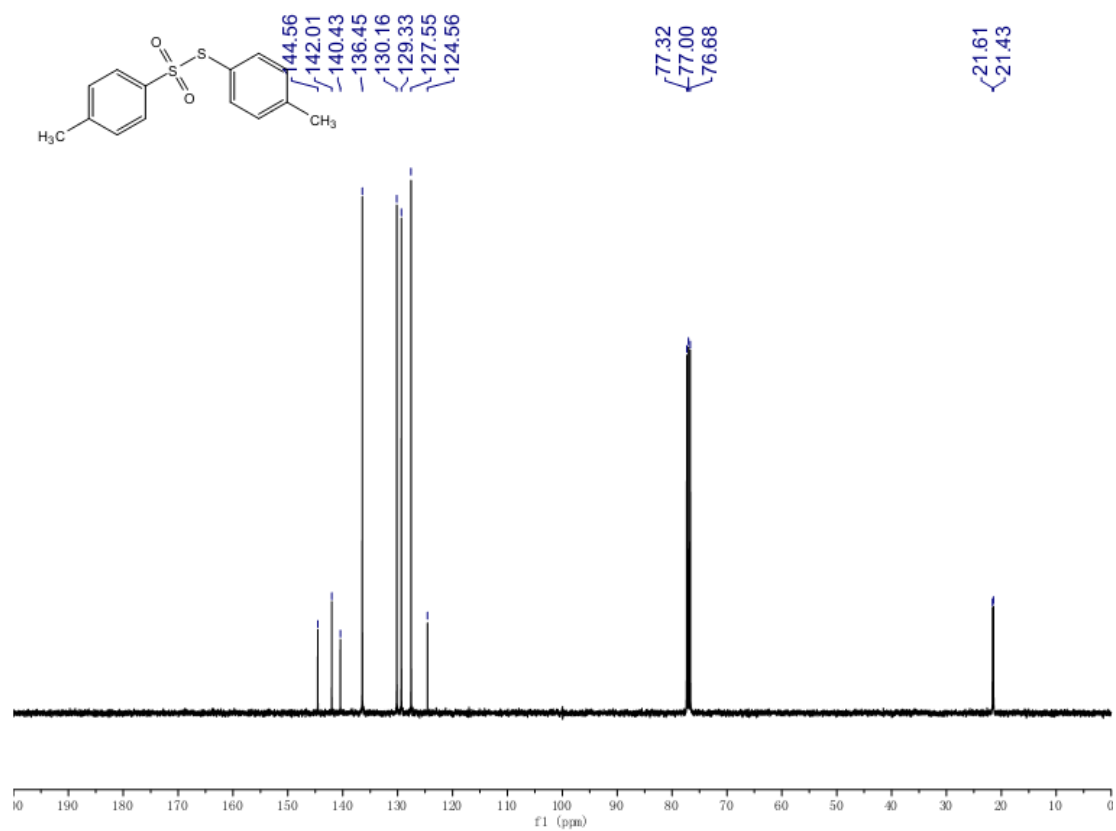

Supplement: c4cc09633a1.pdf [file c4cc09633a1.pdf]
